1  
2  
3  
4  
5  
6  
7  
8  
9  
10  
11  
12  
13  
14  
15  
16  
17  
18  
19  
20  
21  
22  
23  
24  
25  
26  
27  
28  
29  
30  
31  
32  
33  
34  
35  
36  
37  
38

**Vagus nerve stimulation accelerates motor learning through cholinergic modulation.**

Spencer Bowles\*<sup>1,2</sup>, Jordan Hickman\*<sup>1</sup>, Xiaoyu Peng\*<sup>1,2</sup>, W. Ryan Williamson<sup>3</sup>, Rongchen Huang<sup>1,2</sup>, Kayden Washington<sup>1</sup>, Dane Donegan<sup>1,2</sup>, Cristin G Welle<sup>1,2,4</sup>

<sup>1</sup>Department of Physiology and Biophysics, <sup>2</sup>Department of Neurosurgery, <sup>3</sup>IDEA Core, University of Colorado School of Medicine. \* These authors contributed equally to this work. <sup>4</sup>Corresponding author. Email: [cristin.welle@cuanschutz.edu](mailto:cristin.welle@cuanschutz.edu).

39 **Abstract**

40 Vagus nerve stimulation (VNS) is a neuromodulation therapy for a broad and rapidly expanding set of neurologic  
41 conditions. Classically used to treat epilepsy and depression, VNS has recently received FDA approval for stroke  
42 rehabilitation and is under preclinical and clinical investigation for other neurologic indications. Despite benefits across a  
43 diverse range of neurological disorders, the mechanism through which VNS influences central nervous system circuitry is  
44 not well described, limiting therapeutic optimization. A deeper understanding of the influence of VNS on neural circuits  
45 and activity is needed to maximize the use of VNS therapy across a broad range of neurologic conditions.

46 To investigate how VNS can influence the neurons and circuits that underlie behavior, we paired VNS with upper  
47 limb movement in mice learning a skilled motor task. We leveraged genetic tools to perform optogenetic circuit dissection,  
48 as well as longitudinal *in vivo* imaging of calcium activity in cortical neurons to understand the effect of VNS on neural  
49 function. We found that VNS robustly enhanced motor learning when temporally paired with successful movement  
50 outcome, while randomly applied VNS impaired learning. This suggests that temporally-precise VNS may act through  
51 augmenting outcome cues, such as reinforcement signals. Within motor cortex, VNS paired with movement outcome  
52 selectively modulates the neural population that represents outcome, but not other movement-related neurons, across both  
53 acute and behaviorally-relevant timescales. Phasic cholinergic signaling from basal forebrain is required both for VNS-  
54 driven improvements in motor learning and the effects on neural activity in M1. These results indicate that VNS enhances  
55 motor learning through precisely-timed phasic cholinergic signaling to reinforce outcome, resulting in the recruitment of  
56 specific, behaviorally-relevant cortical circuits. A deeper understanding of the mechanisms of VNS on neurons, circuits  
57 and behavior provides new opportunities to optimize VNS to treat neurologic conditions.

## 58 Introduction

59 Vagus Nerve Stimulation (VNS) is currently used in clinical care to treat epilepsy<sup>1,2</sup> and depression<sup>3</sup>, but novel stimulation  
60 paradigms are being explored to treat a broad and growing range of neurologic injuries<sup>4-6</sup>. Recently, VNS temporally  
61 paired with motor rehabilitation was approved by the FDA for the treatment of motor deficits associated with stroke<sup>6</sup>.  
62 Preclinical and early clinical studies suggest that other paired-VNS paradigms can accelerate functional recovery from  
63 multiple neurologic conditions, including spinal cord injury, peripheral nerve injury and traumatic brain injury<sup>7-9</sup>. Despite  
64 the wide-ranging etiology of these conditions, the therapeutic model is similar: VNS is paired with a relevant rehabilitation  
65 protocol. It is hypothesized that this precise timing of stimulation drives targeted circuit plasticity for recovery from  
66 injury<sup>5,10</sup>. Yet, the lack of a clear circuit mechanism limits optimization of VNS therapy to treat neurologic injury.

67 The circuitry that mediates VNS effects on central nervous system plasticity remains poorly understood. Vagus  
68 nerve afferents terminate in the brainstem nucleus tractus solitarius (NTS)<sup>11</sup>, which in turn activates many subcortical and  
69 cortical brain regions, including major subcortical neuromodulatory nuclei<sup>12-14</sup>. Lesions of major neuromodulatory centers,  
70 including the cholinergic basal forebrain (BF), limit both VNS-driven cortical map plasticity<sup>15,16</sup> and functional  
71 rehabilitation after peripheral nerve damage<sup>9</sup>. In addition, the cholinergic basal forebrain has been indicated as necessary  
72 for motor learning<sup>17</sup>, and phasic cholinergic signals are thought to play critical roles in reinforcement learning and outcome  
73 representation<sup>18,19</sup>. Together, these data suggest a possible role for phasic cholinergic signaling in mediating the effects of  
74 VNS-driven learning.

75 Paired VNS drives cortical map expansion specific to the associated sensory or motor representation. For instance,  
76 VNS paired with a forelimb movement expands the forelimb cortical representation<sup>20</sup> while VNS paired with an auditory  
77 tone expands the cortical representation of that tone<sup>21</sup>. However, map expansion is delayed relative to changes in behavior,  
78 and does not always correlate to improved performance<sup>22</sup>. To achieve the improvements in motor and sensory learning,  
79 VNS must also influence specific neural activity and plasticity on shorter, behaviorally-relevant timescales.  
80 Electrophysiological<sup>23-25</sup> and recent *in vivo* imaging studies have identified broad, excitatory effects of VNS across multiple  
81 cortical regions<sup>14</sup>. Yet, this non-specific alteration in excitatory drive cannot account for the selectivity of paired-VNS  
82 stimulation, which requires a specific refinement of relevant cortical circuits<sup>8</sup>.

83 To understand the mechanisms by which VNS can selectively modulate neural circuits to optimally enhance motor  
84 behavior, we compared the effect of VNS timing on skilled reach learning in mice and probed the underlying circuit using  
85 optogenetic cholinergic circuit manipulation, kinematic analysis, and *in vivo* calcium imaging in the motor cortex. Paired-  
86 enhanced skilled reach learning, but only when applied after a successful reach (Success VNS). Improved reach  
87 performance was explained by accelerated consolidation of reach trajectory onto an expert trajectory, indicating earlier and  
88 more effective motor learning. Cholinergic neural activity in the BF was required for the effects of VNS on motor learning  
89 and reach kinematics. VNS altered specific neural populations relevant to outcome representation in the primary motor  
90 cortex, and the effects of VNS in M1 were mitigated by cholinergic antagonists. These results indicate that VNS enhances  
91 motor learning through precisely-timed phasic cholinergic signaling to reinforce outcome, resulting in the recruitment of  
92 specific, behaviorally-relevant cortical circuits.

93

94

95

## 96 **Results**

### 97 **VNS enhances skilled motor learning when paired with successful task outcome**

98 To induce motor rehabilitation and cortical plasticity, VNS must be paired with movement<sup>20,26</sup>, yet an optimal pairing  
99 protocol has not been identified<sup>8</sup>. To determine the optimal timing of VNS during skilled motor learning, we applied  
100 multiple VNS pairing protocols as mice learned a skilled forelimb reaching task<sup>27</sup>. Using a newly developed chronic VNS  
101 approach for mice<sup>28</sup>, we implanted a microfabricated stimulation cuff on the left cervical vagus nerve (**Fig. 1a**), connected  
102 to a skull-mounted headcap. Mice were trained to perform a the skilled reach task, where they learn to reach through a slit  
103 to grab a food pellet off a post, for 14 days (**Fig. 1b,c**).

104 We explored three possible mechanisms by which VNS could influence motor learning: arousal, spike-timing  
105 dependent plasticity and reinforcement (**Fig. 1b,c, see Methods for additional detail**). To test if VNS drives plasticity by  
106 increasing widespread cortical excitation and arousal<sup>14,29,30</sup>, VNS was applied at pseudo-random intervals (Random VNS)  
107 during the 20-minute training session. Alternatively, to determine if VNS acts through modulation of short-term attention  
108 or by influencing spike timing dependent plasticity<sup>31</sup>, VNS was applied at the initiation of a subset of reach movements  
109 (Reach VNS). To explore if VNS may augment reward or reinforcement related to movement outcome<sup>32,33</sup>, a third cohort  
110 received VNS after successful reach completion (Success VNS). The surgical control cohort was implanted with  
111 stimulation cuffs and connected to a stimulation isolation unit that was turned ‘off’ (Sham VNS). Current amplitude was  
112 consistent across groups and the number of stimulation trains delivered during training did not correlate with reach success  
113 rate (**Supp. Fig.1a-c**).

114 Animals in all cohorts learned to perform the skilled reach task (Sham VNS:  $p=0.0001$ , Random VNS:  $p=0.0001$ ,  
115 Reach VNS:  $p=0.0002$ , Success VNS:  $p=0.001$ ; **Supp. Fig. 2b-e**). Neither Random nor Reach VNS altered the success  
116 rate of the animals relative to Sham VNS (Random VNS:  $47.4 \pm 3.9\%$ ; Reach VNS:  $53.6 \pm 3.5\%$ ; Sham VNS:  $46.3 \pm 3.2\%$ ;  
117 **Fig. 1d,e,g**). However, Success VNS improved the overall success rate compared to Sham VNS ( $59.2 \pm 3.1\%$  vs  $46.3 \pm$   
118  $3.2\%$ ; **Fig. 1f,g**), demonstrating for the first time that paired VNS can enhance motor learning in healthy animals.

119 Prior work on learning of a skilled reach suggests a multiphasic approach to learning, with distinct early and late  
120 learning phases<sup>34,35</sup>. Yet the timing of early to late transition has not been empirically demonstrated. Using a Weibull  
121 growth curve nonlinear model of the control learning curve, we identified an inflection point ( $55.49\% \pm 6.81$ ) to determine  
122 early learning (days 1-4) and late learning (days 5-14; **Supp. Fig. 2a**). We next examined if VNS exerted distinct effects  
123 during different learning stages. Despite having no effect on the overall success rate, Random VNS impaired early learning  
124 ( $27.3 \pm 7.3\%$  vs.  $37.4 \pm 8.9\%$ ), but performance recovered during late learning (**Fig. 1h**). Reach VNS had no influence on  
125 success rates at any phase of learning (**Fig. 1i**). Success VNS increased success rates during the early and late phases  
126 (Early:  $50.6 \pm 9.4\%$  vs.  $37.4 \pm 8.9\%$ ; Late:  $63.6 \pm 6.9\%$  vs.  $49.6 \pm 13.2\%$ ; **Fig. 1j**). These data suggest that VNS paired with  
127 a successful outcome accelerates learning and increases the final proficiency of a forelimb task, while random application  
128 of stimulation temporarily impairs learning during early learning.

129 As only Success VNS enhanced motor learning, this indicated that VNS act through mechanisms paired with  
130 successful outcomes, likely reward or reinforcement. To determine if VNS serves as a rewarding or aversive stimulus<sup>36</sup>,  
131 we used a well-documented behavioral assessment of reward, the conditioned place preference test (CPP) (**Fig. 1k**).  
132 Implanted mice were introduced to two rooms with distinct visual and olfactory cues, with VNS applied in only one room  
133 for several days. On the final day probe session, mice spent equal time in the conditioned (stimulated) room as they did in

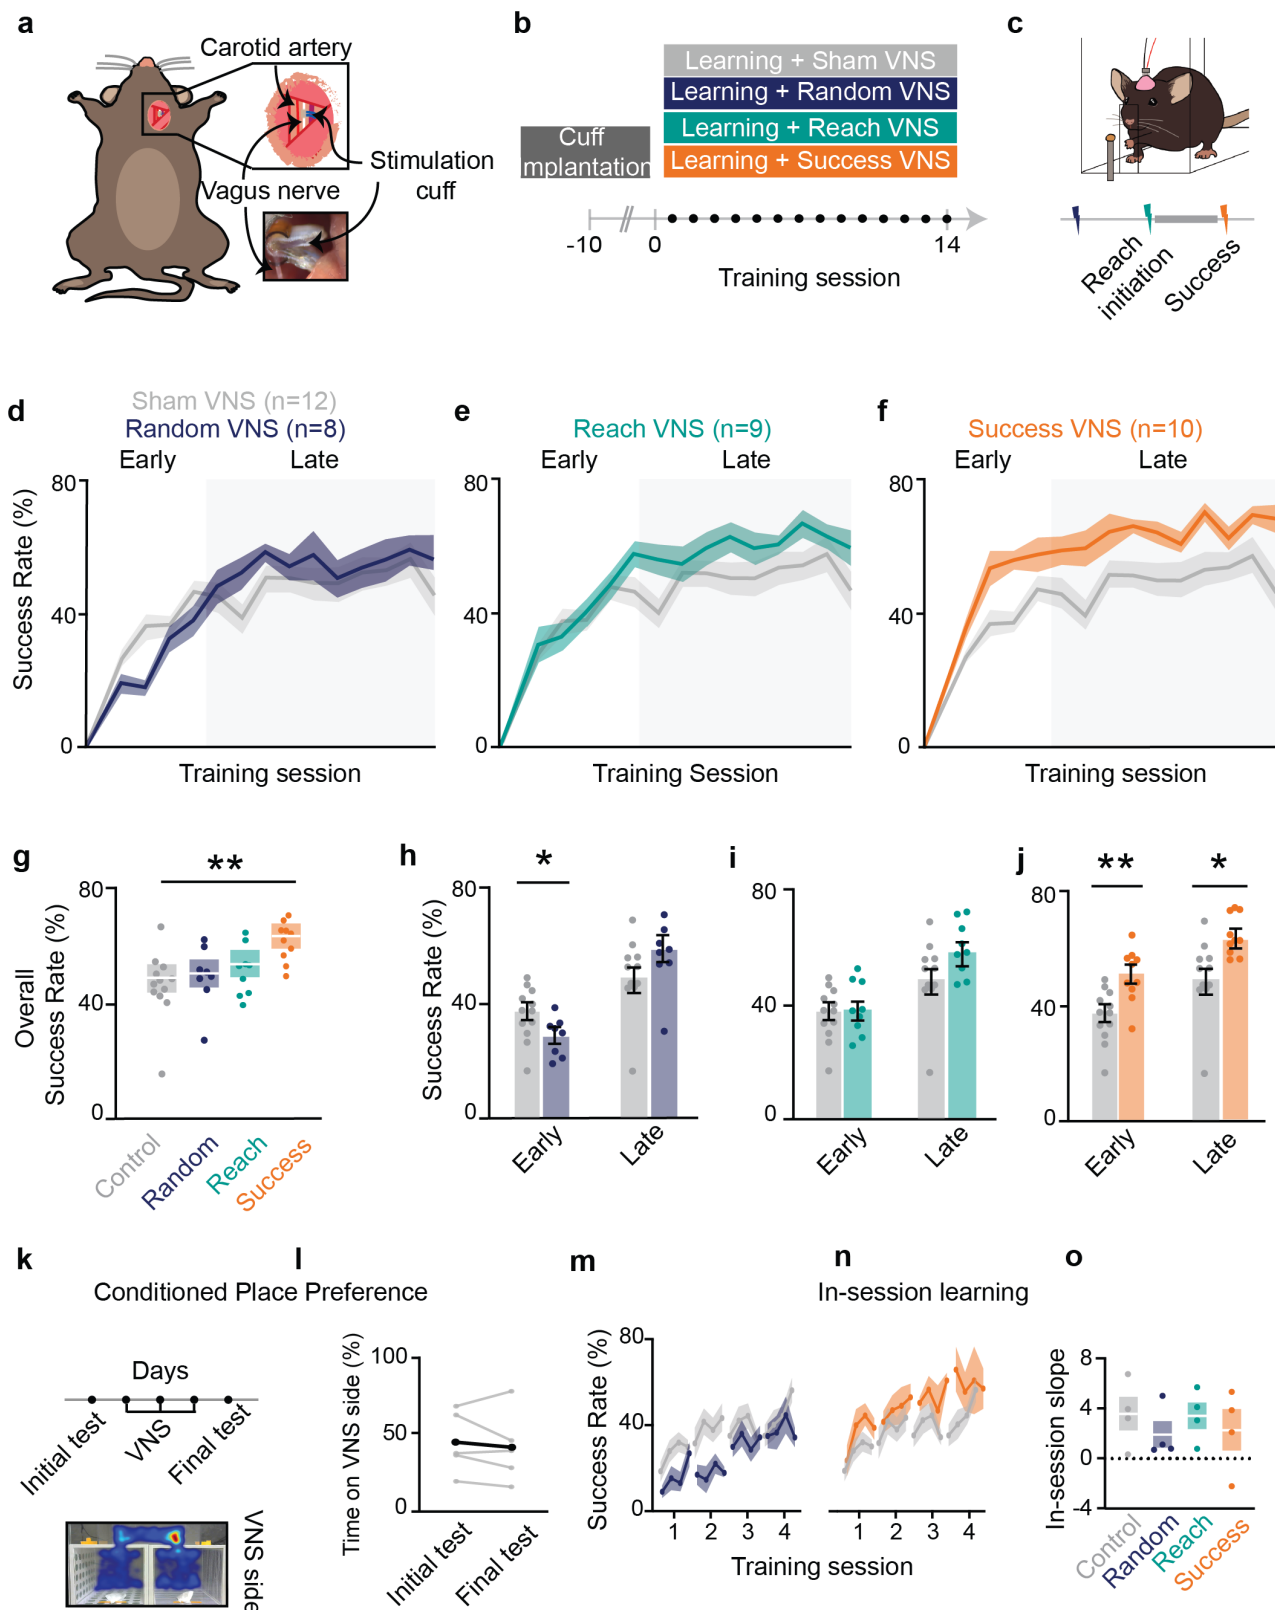

**Figure 1 | VNS modulates forelimb reach learning and requires temporally specific stimulation.**

**a**, VNS surgical approach **b**, Behavior timeline **c**, Stimulation protocol, with Reach and Success VNS applied before and after reach, respectively. **d-f**, Random VNS, Reach VNS, and Success VNS success rate across 14 sessions of training. **g**, Comparison of mean performance across all days between control and stimulated groups (Success VNS:  $p=0.0065$ ,  $f=9.24$ , Random VNS:  $p>0.05$ , Reach VNS:  $p>0.05$ , REML). Shaded boxes denote s.e.m. **h**, Comparison of mean success rate for control and Random VNS mice during early ( $p=0.028$ ,  $f=7.07$ , Student T test) and late learning ( $p>0.05$ ). **i**, Comparison of mean success rate for control and Reach VNS mice during early and late learning ( $p>0.05$ ). **j**, Comparison of mean success rate for control and Success VNS mice during early ( $p=0.0031$ ) and late learning ( $p=0.0126$ ). **k&l**, VNS mice performed a conditioned place preference test after 3 days being stimulated in one of two distinct rooms. **m&n**, In-session learning trajectories for each group. **o**, Comparison of within session learning between all groups across 4 days of learning. \* $p<0.05$ , \*\* $p<0.01$ , \*\*\* $p<0.001$  bars and error bars represent the mean  $\pm$  s.e.m.

135 their initial naïve session ( $44.8 \pm 2.0\%$  and  $41.4 \pm 2.3\%$ ; **Fig. 11**), indicating that VNS is not inherently rewarding or  
 136 aversive. Together, these results suggest that Success VNS may act by augmenting reinforcement cues, but not serve as a  
 137 rewarding stimulus.

138 To determine if VNS alters within-session learning or between-session learning<sup>37</sup>, training session data was  
 139 grouped into 4 blocks of 5 trials each (**Fig. 1m,n**), and the within-session learning slope was quantified over the first 4  
 140 days (**Fig. 1o**). The within-session learning slope was not significantly different between conditions, suggesting that  
 141 Success VNS likely enhances between-session learning.

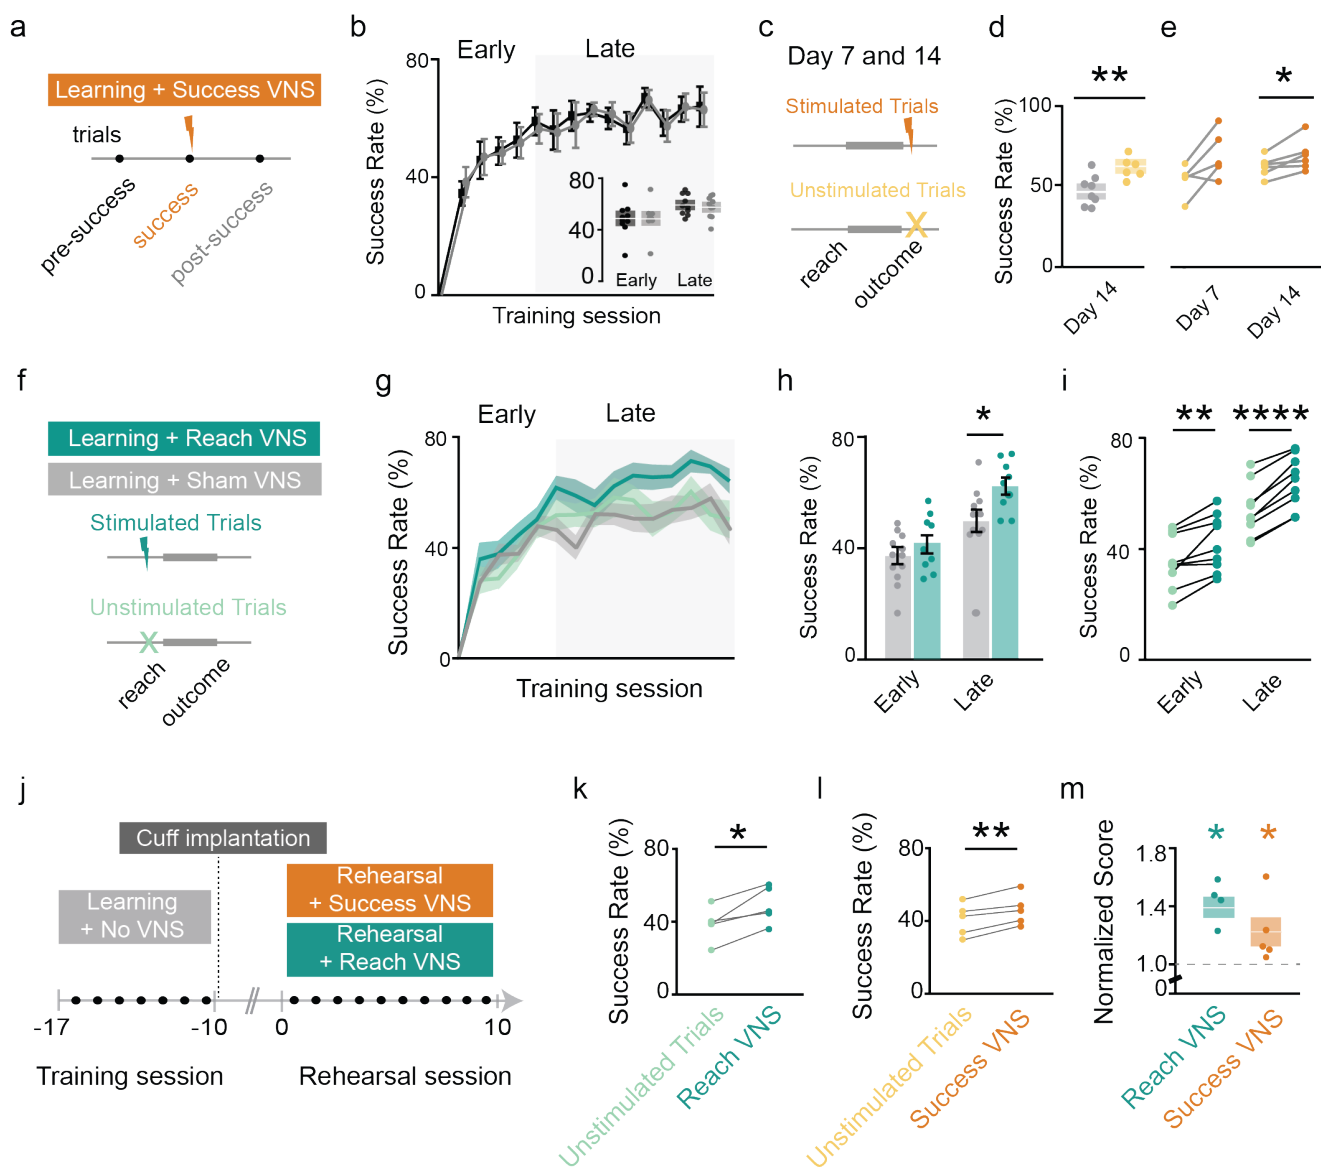

**Figure 2 | VNS improves success rate within sessions and in learned mouse during rehearsal of forelimb reach task.**

**a**, Trials before and after a stimulated success are investigated in success VNS. **b**, Comparison of success rate for reaches preceding or following stimulated reach. **c**, For Success VNS, day 7 and 14 trials are divided into equal blocks of unstimulated and stimulated trials. **d**, Comparison of unstimulated (light orange) and sham (grey) trials on day 14 ( $p=0.0059$ ,  $t=3.34$ , Student's T test). **e**, Comparison of stimulated (dark orange) and unstimulated (light orange) trials on days 7 & 14 (Day 7:  $p>0.05$ ; Day 14:  $p=0.0499$ ,  $t=2.57$ , Ratio paired t test). **f**, Reach VNS schematic. **g**, Success rates across learning training sessions for Sham (grey), Stimulated Reach VNS (dark green), and Unstimulated Reach VNS (light green). **h**, Comparison of Stimulated Reach VNS and Sham VNS trials in early ( $p>0.05$ ) and late learning ( $p=0.024$ ,  $t=2.47$ , Student's T test). **i**, Comparison between stimulated Reach VNS and unstimulated Reach VNS trials in early ( $p=0.004$ ,  $t=3.98$ , paired t test) and late learning ( $p<0.0001$ ,  $t=10.08$ , paired t test). **j**, Success VNS and Reach VNS applied during rehearsal of reach task in trained mice. **k**, Stimulated Reach VNS trials improve success rate during rehearsal ( $p=0.015$ ,  $t=4.058$ , paired t test). **l**, Stimulated Success VNS trials improve success rate during rehearsal ( $p=0.005$ ,  $t=5.62$ , paired t test). **m**, Normalized improvement of Stimulated Reach VNS ( $p=0.047$ ,  $t=3.56$ ) and stimulated Success VNS trials ( $p=0.028$ ,  $t=4.16$ ) compared to unstimulated trials (Sidak's multiple comparison's test in RM one-way ANOVA). \* $p<0.05$ , \*\* $p<0.01$ , \*\*\* $p<0.001$ ; bars and error bars represent the mean  $\pm$  s.e.m.

142

143 **VNS confers short-term performance benefits during the execution of learned tasks.**

144 Despite a lack of evidence for within-session learning, we wanted to confirm the behavioral results were due to learning,  
145 and not short-term modulation of attention. Since Success VNS is applied after reach outcome, the success rate of trials  
146 that immediately follow a stimulation (post-success) were compared to those immediately prior (pre-success). We found  
147 no effect of VNS on the success rate of trials following stimulation (**Fig. 2a,b**). We next compared the response to Success  
148 VNS to an unstimulated probe trial block included on days 7 and 14 (**Fig. 2c**). The success rate for unstimulated trials on  
149 Day 14 was greater than Sham VNS ( $61.9 \pm 6.3\%$  vs.  $46.6 \pm 9.2\%$ ; **Fig. 2d**), suggesting that Success VNS led to  
150 stimulation-independent, lasting learning. Yet, success rate during stimulated blocks was greater than unstimulated blocks  
151 on day 14 ( $69.7 \pm 10.2\%$  and  $61.9 \pm 6.3\%$ ), but not day 7 (**Fig. 2e**), implying a short-term performance benefit that emerges  
152 during late learning.

153 To further explore potential short-term benefits of VNS, we took advantage of the Reach VNS trial design, which  
154 allowed subgroup analysis of only stimulated or unstimulated reaches (**Fig. 2f**). The success rate of stimulated trials is  
155 greater than sham during late learning ( $64.0 \pm 9.4\%$  vs.  $50.8 \pm 13.7\%$ ; **Fig. 2h**), while unstimulated trials are not different  
156 from sham. Paired analysis for individual animals shows a higher success rate for stimulated trials compared to  
157 unstimulated trials in both the early and late phase (Early:  $41.9 \pm 10.2\%$  vs.  $35.3 \pm 9.7\%$ ; Late:  $64.0 \pm 9.4\%$  vs.  $53.7 \pm$   
158  $9.5\%$ ; **Fig. 2i**). Taken together, Reach VNS provides a short-term performance boost for stimulated over unstimulated trials  
159 throughout learning. Similar to the results from Success VNS (**Fig. 2e**), Reach VNS most effectively modulates short-term  
160 performance for motor skills during late learning.

161 The prior results indicate the VNS can confer short-term performance benefit during late learning. To explore if  
162 this generalizes to tasks that are already known (learned without VNS), we applied paired VNS to animals already  
163 proficient in the skilled reaching task (**Fig. 2j**). Both Success VNS (**Fig. 2l,m**) and Reach VNS (**Fig. 2k,m**), delivered on  
164 alternate days for 10 days, improved performance over trial blocks without VNS (Success VNS:  $46.0 \pm 8.5\%$  vs.  $40.8 \pm$   
165  $8.9\%$ ; Reach VNS:  $49.0 \pm 10.2\%$  vs.  $38.8 \pm 9.5\%$ ), confirming that either pairing protocol is sufficient to modulate the  
166 short-term performance of a known task. Together, this demonstrates that VNS confers short-term enhancement to  
167 performance of known motor skills.

168

169 **VNS drives neural activity in the basal forebrain (BF)**

170 Cholinergic neuromodulation is associated with reinforcement-driven plasticity<sup>18,38</sup> and is required for motor learning<sup>39-41</sup>.  
171 The BF is the source of cortically-projecting cholinergic neurons<sup>42</sup>, however it was unknown if BF neurons respond to  
172 VNS. To address this question, we implanted tetrodes into the BF of mice with implanted VNS cuffs (**Fig. 3a**). Extracellular  
173 activity was recorded during VNS in awake animals in their home cage (30 Hz, 0.6 mA, 100  $\mu$ s pulse, 500 ms train). VNS  
174 modulated the firing rate of BF neurons, as compared to baseline firing rate (**Fig. 3b,c**). VNS altered activity in 43% of  
175 recorded units, with 61% of VNS-responsive units (28% of all units) showing increased activity relative to baseline (**Fig.**  
176 **3d**). On average, the firing rate modulation of activated neurons began during the stimulation train (200 ms after stim  
177 onset) and persisted for  $\sim 1$ s after stimulation ended (**Fig. 3e**).

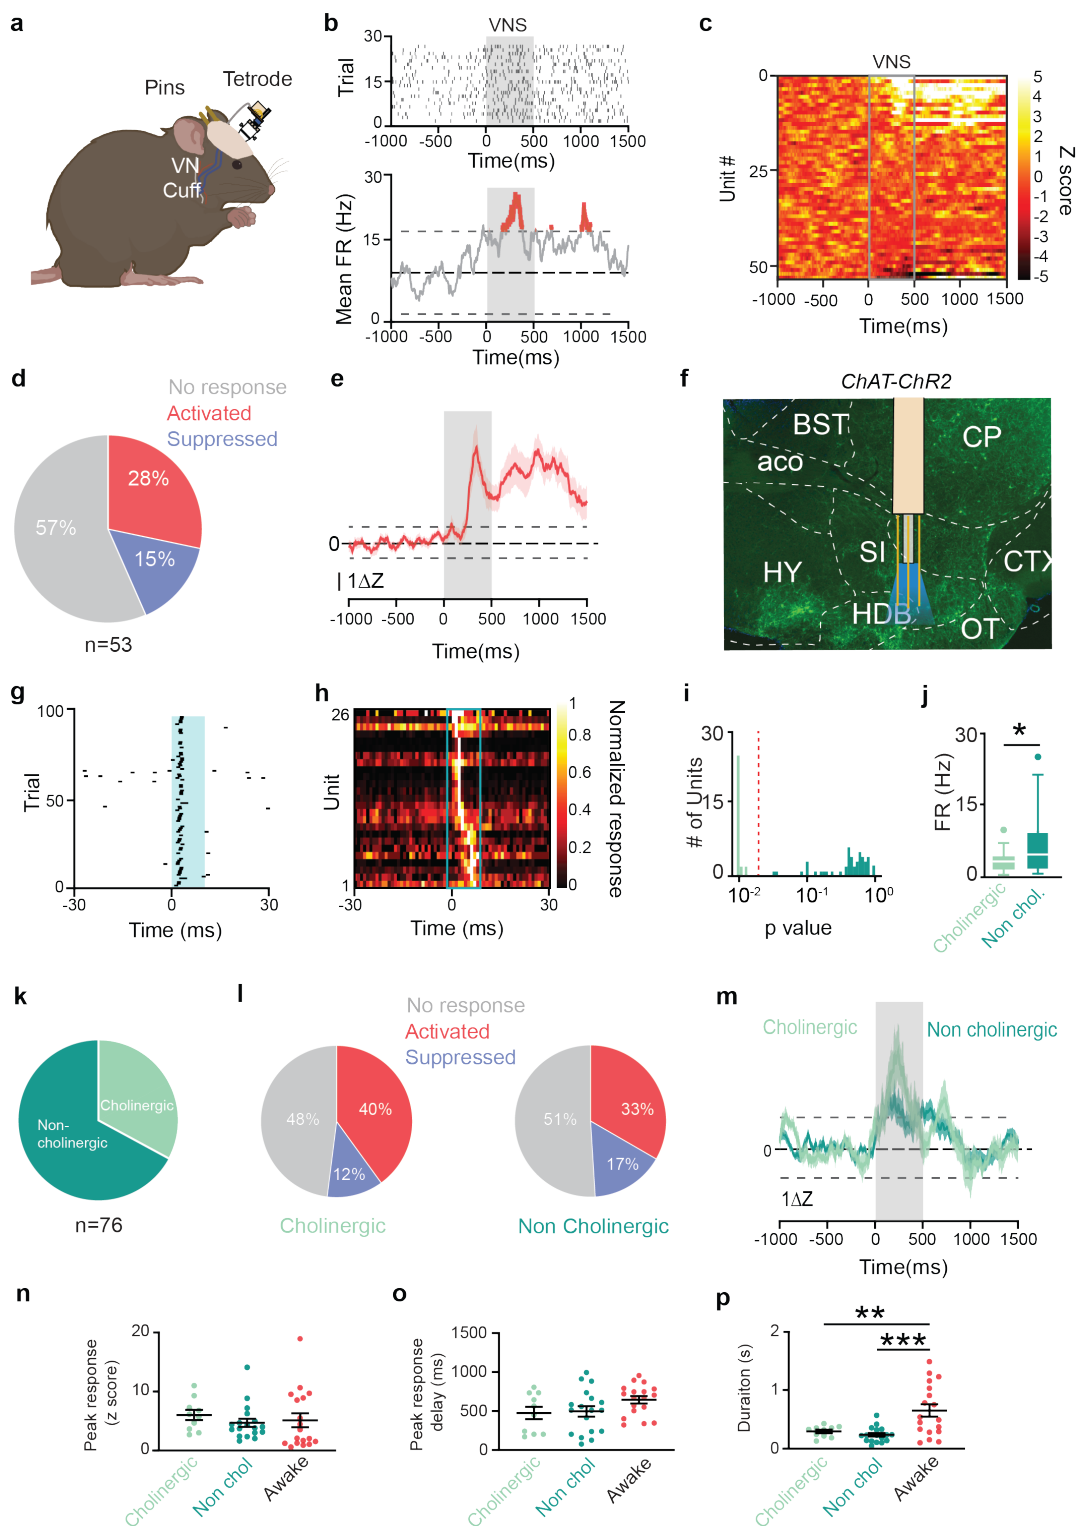

**Figure 3 | VNS drives BF neural activity in anesthetized and awake mice.**

**a**, Tetrodes were implanted in the left BF of mice and recordings were obtained during awake behavior. **b**, Example raster (top) and average firing rate from a response to VNS. Grey box denotes stimulus delivery. **c**, Average responses of all recorded neurons to VNS (grey box). **d**, Percent of neurons that respond to VNS (N = 5 mice, 53 neurons). **e**, Average activity of all ‘activated’ neurons in response to VNS. Dashed lines mark significance, shading represents SE. **f**, Extracellular recordings were obtained using optrodes were targeted at the HDB in *ChAT-ChR2* transgenic mice while under light anesthesia. Green fluorescence denotes the presence of ChR2. **g**, Example cholinergic neuron responding consistently to pulses of 488 nm light. **h**, Average activity of all cholinergic neurons during opto-tagging. Each row represents a neuron. **i**, Stimulus-associated latency tests (SALT) separate light responsive neurons from non-light responsive neurons. **j**, Mean baseline FR of cholinergic and non-cholinergic neurons ( $p=0.013$ , N = 5 mice, 53 neurons). **k**, Percent of neurons categorized as cholinergic (light green) and non-cholinergic (dark green) (N = 6 mice, 76 neurons). **l**, Percent of units that are VNS-responsive in cholinergic (left) and noncholinergic (right) populations. **m**, Average response to VNS for all ‘activated’ neurons. **n**, Mean peak activation during VNS. **o**, Average delay of peak activation from VNS onset. **p**, Mean duration of significantly elevated activity after VNS (cholinergic vs. awake  $p=0.0087$ , non-cholinergic vs. awake  $p=0.0003$ ).



179

180

181

182

183

184

185

186

187

188

189

190

191

192

193

To identify cholinergic neurons from the multiple cells types found within the BF<sup>43</sup>, we used an opto-tagging approach<sup>44</sup> combined with tetrode recordings to interrogate their response to VNS. Acute recordings were performed in anesthetized *Chat-ChR2* transgenic mice (B6.Cg-Tg(Chat-COP4\*H134R/EYFP,Slc18a3)6Gfng/J; **Fig. 3f**). Cholinergic neurons were identified by their rapid response to light (**Fig. 3g,h**) and confirmed using SALT analysis<sup>18</sup> (latency  $5.2 \pm 1.3$  ms; **Fig. 3i**). Cholinergic neurons exhibited a lower baseline firing rate ( $3.4 \pm 2.1$  Hz) than the non-cholinergic population ( $6.8 \pm 6.2$  Hz; **Fig. 3j**). Of 76 units, roughly  $\frac{1}{3}$  were cholinergic (**Fig. 3k**) and half of both neuron populations were VNS-responsive (52% of cholinergic, 49% of non-cholinergic; **Fig. 3l**). Of the VNS-responsive units, most cholinergic units and non-cholinergic units showed increased activity (**Fig. 3m**), suggesting that VNS increases activity in both cholinergic and non-cholinergic populations of the BF.

A comparison of VNS-driven activation in anesthetized recordings to awake recordings suggests that the response to VNS depends on arousal state (**Fig. 3e,m**), consistent with prior findings<sup>14</sup>. While the peak response magnitude and timing to VNS do not change between awake and anesthetized animals (**Fig. 3n,o**), awake animals have a longer response than anesthetized animals (awake:  $652.7 \pm 439$  ms; cholinergic:  $293.7 \pm 94$  ms; non-cholinergic:  $235.8 \pm 127$  ms; **Fig. 3p**). These data confirm that VNS increases BF cholinergic activity, making it a strong candidate for mediating learning effects.

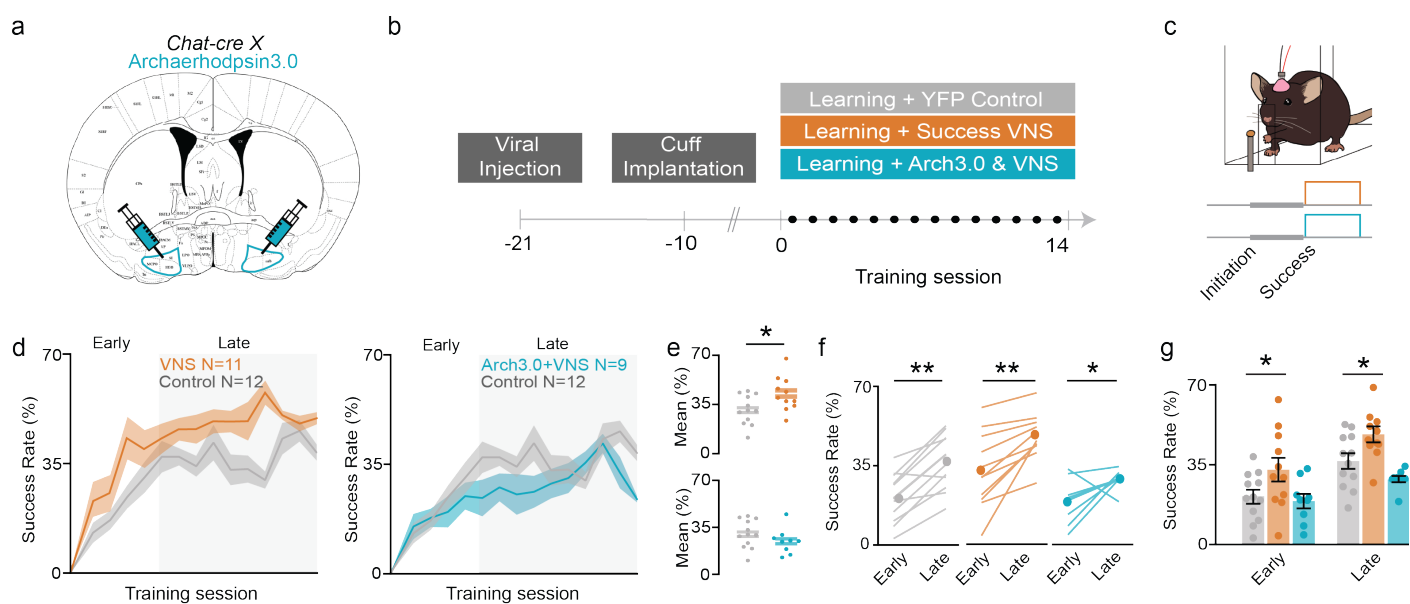

**Figure 4 | Success-paired VNS motor learning enhancement requires cholinergic neuromodulation.**

**a**, A subset of VNS-implanted *Chat-Cre* transgenic mice also received injections of viral constructs containing Archaerhodopsin3.0 bilaterally in the BF (right). Mice were chronically implanted with bilateral fiberoptic cannulas for light delivery. **b**, Timeline of experimental set up and training. Each training session lasts for 20 minutes. **c**, Depending on cohort, mice receive VNS, or continuous 532 nm light and VNS simultaneously, after successful reach attempts. **d**, Average success rate for all mice over the course of learning (VNS N=11, Arch+VNS N=9, Control N=12). **e**, Mean performance across all days between VNS and control ( $p=0.0409$  (top)), and Arch+VNS and control ( $p>0.05$  (bottom)). **f**, Mean success rate of all groups between early and late phases (Control  $p=0.0001$ , VNS  $p=0.0009$ , Arch VNS  $p=0.0379$ ). **g**, Mean success rate for control and VNS mice during early ( $p=0.0458$ ) and late ( $p=0.0001$ ) learning phases and control and Arch+VNS mice ( $p>0.05$ ).

194

195

### Optogenetic cholinergic inhibition prevents VNS-enhanced motor learning

196

197

198

199

Having established that VNS can drive BF cholinergic neurons, we next wanted to determine if these neurons mediate the effects of VNS to enhance motor learning. To do so, we used optogenetic control to silence cholinergic neurons during VNS. An inhibitory opsin (AAV-EF1a-DIO-eArch3.0-EYFP) was injected into the BF of *Chat-Cre* transgenic mice, followed by implanted optical fibers and VNS cuffs (see methods; **Fig. 4a**). Mice then learned to perform the skilled reach

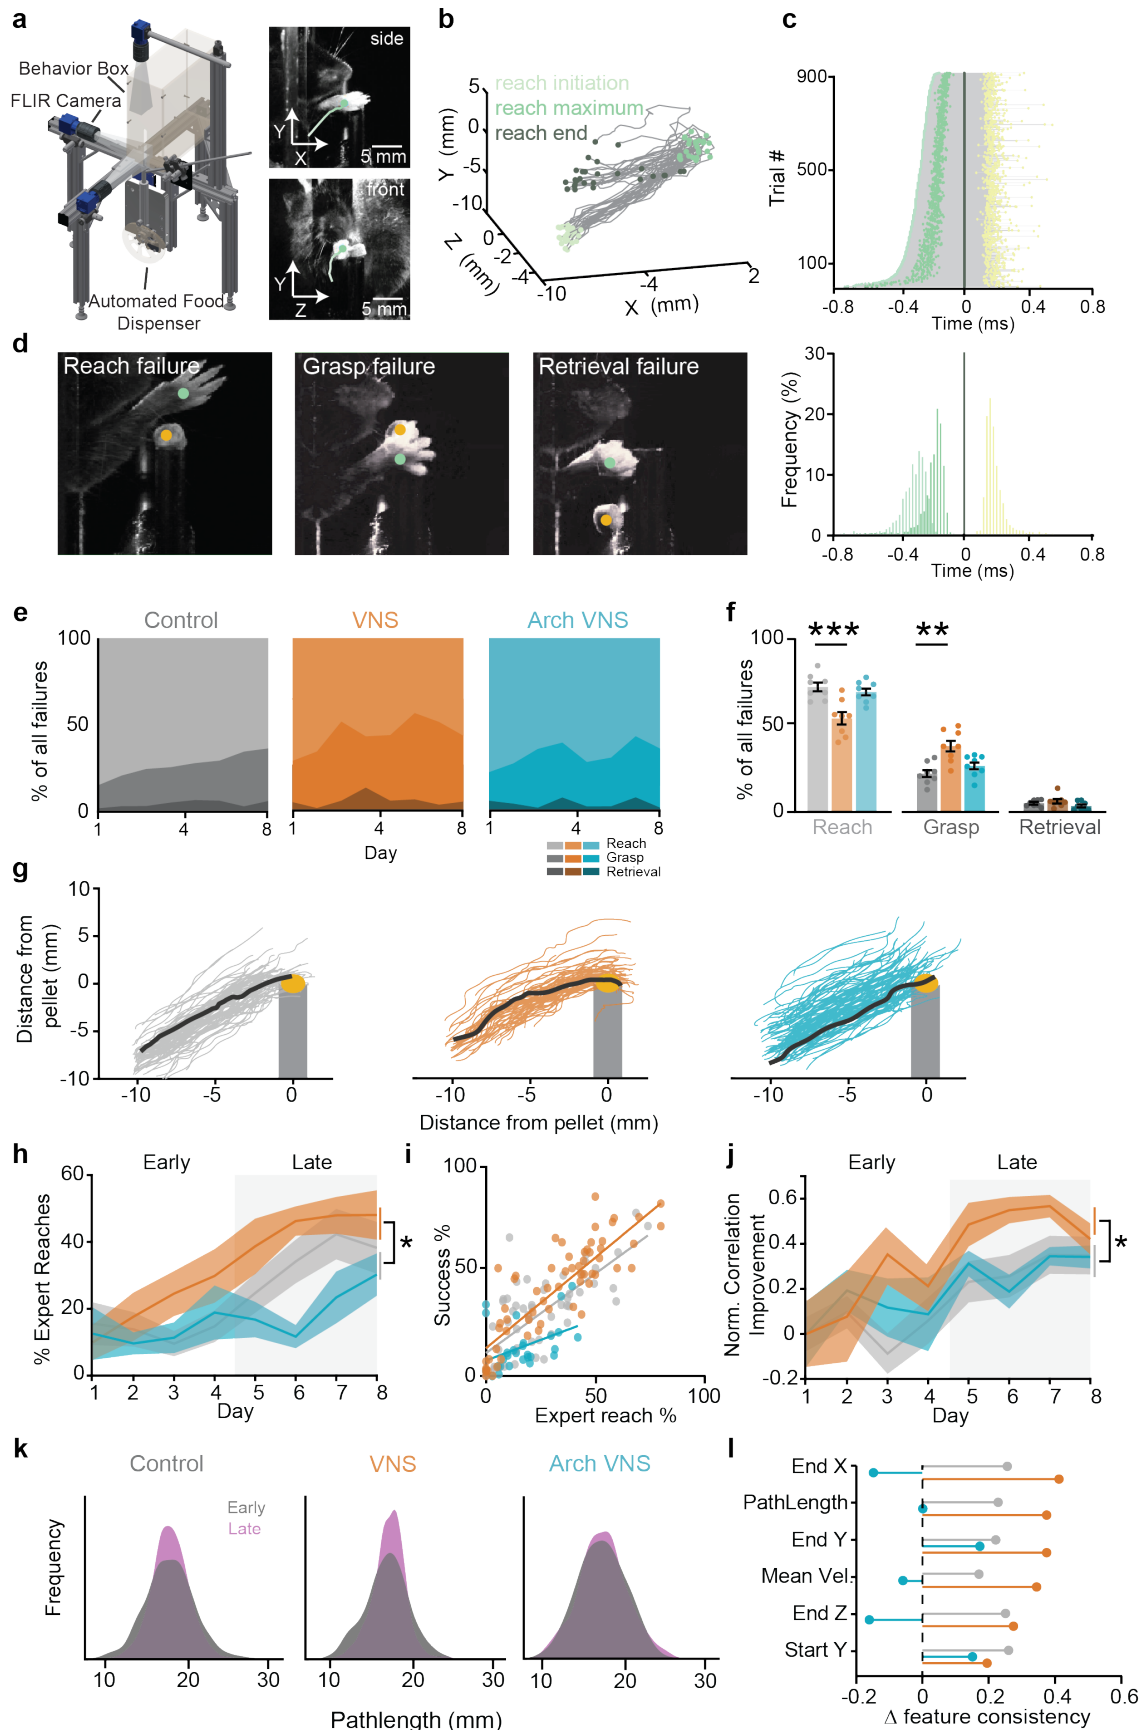

**Figure 5 | VNS improves performance through improved consolidation of reach trajectory.**

**a**, The Closed-loop automated reaching apparatus (CLARA) provides 3D tracking of the paw and pellet. **b**, A custom CLARA data pipeline automatically identifies reaching events (one mouse one control session). **c**, CLARA rapidly delivers stimulation after reach end in a closed-loop fashion ( $180 \pm 5$ ms). Top: duration of all stimulated control trials, yellow dot denotes stimulus delivery. Bottom: a histogram of reach timepoints normalized to reach end.

201 task (**Fig. 4b**). One cohort received Success VNS, a second received Success VNS simultaneously with optical inhibition  
202 of the BF (Arch+VNS), while the control cohort was unstimulated (**Fig. 4c**). VNS animals ( $40.55 \pm 7.1\%$ ) performed  
203 significantly better than controls ( $31.23 \pm 10.4\%$ ), while Arch+VNS animals performed at control levels ( $25.59 \pm 9.3\%$ ;  
204 **Fig. 4d,e**). While all cohorts learned the task (**Fig. 4f**), cholinergic inhibition prevented VNS-driven performance increases  
205 in both learning phases (Early:  $19.02 \pm 9.5\%$ ; Late:  $28.66 \pm 4.1\%$ ) compared to VNS mice (Early:  $32.81 \pm 17.1\%$ ; Late:  
206  $48.28 \pm 11.6\%$ ; **Fig. 4g**), demonstrating that phasic cholinergic signaling is necessary for VNS-enhanced motor learning.  
207

## 208 VNS reduces off-target failures through increased reach consistency

209 To further explore how VNS can influence the learning of a skilled reach, we measured the kinematic features of the reach  
210 across learning and conditions. To obtain accurate kinematic measures, we designed a custom closed-loop automated  
211 reaching apparatus (CLARA) to track forelimb kinematics in real-time, and apply closed-loop VNS following automated  
212 classification of reach outcome<sup>45</sup> (**Fig. 5a-c**). Using video data acquired by CLARA, trials were categorized into one of  
213 four categories: success; reach failures; grasp failures; and retrieval failures (**Fig. 5d**). These reach-types were compared  
214 in control, Success-VNS and Arch+VNS mice to determine if VNS influences reach kinematics and improve motor  
215 learning. Out of all errors, success-VNS mice made fewer reach failure errors than control and Arch+VNS mice (VNS:  
216  $54.14 \pm 10.4\%$ ; Control:  $72.16 \pm 7.0\%$ ; Arch+VNS:  $71.66 \pm 4.5\%$ ), and more on-target grasp errors (VNS:  $38.19 \pm 9.2\%$ ,  
217 Arch+VNS:  $24.00 \pm 4.8\%$ , control:  $22.14 \pm 6.0\%$ ; **Fig. 5e,f**). The reduction in off-target reach failures implies an improved  
218 accuracy in reach trajectory. Therefore, we explored if VNS drives a speed/accuracy trade-off<sup>46</sup>. We measured reach  
219 endpoint accuracy and outward reach velocity (see methods; **Supp. Fig. 3a,b**) and found that Success VNS does not alter  
220 endpoint accuracy or speed of reach attempts (**Supp. Fig. 3c**), suggesting that it does not influence performance through  
221 modulation of either speed or endpoint accuracy.

222 As animals learn the skilled reach task, their reach trajectories become more similar to their final expert reach  
223 trajectory<sup>34,47</sup>, indicating that the animals are learning to execute a successful motor plan. To determine if VNS can  
224 influence the motor plan selection, an expert trajectory was defined for each mouse based on the average successful reach  
225 trajectory over the last two days of training (see methods; **Fig. 5g**). Across all training days, expert reaches were identified  
226 by having a  $>0.95$  correlation with the expert trajectory. On day 1 of training, all cohorts have similar percentage of expert  
227 reaches (**Fig 5i**; **Supp. Fig. 3d**), but during late learning, VNS mice made significantly more expert reaches compared to  
228 control mice (VNS:  $45.22 \pm 4.4\%$ ; Control:  $34.22 \pm 6.6\%$ ) while cholinergic inhibition prevented this increase in expert  
229 reach selection ( $23.58 \pm 6.2\%$ ; **Fig. 5h**). Expert reach attempts correlate strongly with behavioral performance ( $p=0.0001$ ,  
230  $R^2=0.621$ ), demonstrating that this increased stereotypy onto the expert trajectory explains the improved performance (**Fig.**  
231 **5i**). VNS also shapes the trajectory of reaches that end in failure. While reach failures rarely qualify as expert reaches  
232 (**Supp. Fig. 5e**), VNS increases the correlation of reach failures to the expert trajectory during late learning to a greater

### Figure 5 | VNS improves performance through improved consolidation of reach trajectory (con't).

**d**, Example images of the three subcategories of failed reaches (see METHODS). **e**, Breakdown of failure outcomes for each group over 8 days of learning. Light colors: reach failures; intermediate: grasp failures; dark: retrieval failures. **f**, A comparison of types of failed attempts between control and VNS (reach errors:  $p=0.0005$ ; grasp errors:  $p=0.0035$ ) and between control and Arch+VNS mice ( $p>0.05$ ) (VNS N=8, Arch+VNS N=8, Control N=8). **g**, Examples of all outward trajectories (reach initiation – reach maximum) during a session on day 8. Black lines represent each mouse's 'expert reach'. **h**, Percent of reaches that are 'expert'. Comparisons were made for the mean 'expert' reaches in the late learning phase (grey box) between control and VNS mice ( $p=0.0142$ ) and control and Arch+VNS mice ( $p>0.05$ ) (VNS N=8, Arch+VNS N=6, Control N=8). **i**, Correlation of 'expert' reaches and task performance for all mice,  $R^2=0.62$ . **j**, Improvement in reach failures toward an expert trajectory as measured by increase in correlation coefficient (normalized to day 1). Comparisons were made during late learning between control and VNS mice ( $p=0.0455$ ) and control and Arch+VNS mice ( $p>0.05$ ). **k**, Distribution of trajectory lengths from all failure attempts during early (grey) and late (purple) learning phases. **l**, Normalized improvement in reach features from early to late learning phases.

233 degree than control mice, and cholinergic inhibition prevents this increase (VNS:  $50.18 \pm 16.6$ ; Control:  $29.65 \pm 19.9$ ;  
 234 Arch+VNS:  $33.19 \pm 11.6$ ; **Fig. 5j**). Additional kinematic features also show a VNS-driven increase of the consolidation of  
 235 other reach features between early and late phases (narrower histogram with a higher peak; **Fig. 5k,l**), indicating increased  
 236 stereotypy in the VNS cohort. This data suggests that VNS drives all reaches closer to the expert reach trajectory, and this  
 237 is mediated by cholinergic signaling. This demonstrates that VNS improves task performance by enhancing the selection  
 238 of a success motor plan.

239

## 240 VNS drives acute neural suppression and activation in motor cortex

241 VNS paired with forelimb movement alters motor cortical map plasticity<sup>20</sup>, but the effect of VNS on neuronal function in  
 242 motor cortex is unknown. Given that neural activity in M1 is required for both motor skill learning and execution<sup>47,48</sup>  
 243 (**Supp. Fig. 4a**), we hypothesize that VNS will modulate the neural activity and movement representation in M1. To  
 244 investigate the effects of VNS on M1 neural activity, we imaged activity in neurons expressing the calcium indicator  
 245 GCaMP6m using a head-mounted miniature microscope (UCLA miniscope V3, <http://miniscope.org>; **Fig. 6a**). VNS was  
 246 applied to freely-moving animals in the homecage environment.

247 In response to VNS, some neurons demonstrated either activation (red, cell 25; **Fig. 6b**) or suppression (blue, cell  
 248 36; **Fig. 6b**), without a change in the overall firing rate of the neuron population (**Supp. Fig. 5a,b**). Approximately 30%  
 249 of all neurons showed acute response to a VNS delivery, with roughly similar percentages of neurons showing activation and  
 250 suppression (activation:  $13.8 \pm 5.8\%$ ; suppression:  $18.1 \pm 15.8\%$ ; **Fig. 6d**), and only a small fraction ( $0.7 \pm 1.4\%$ )

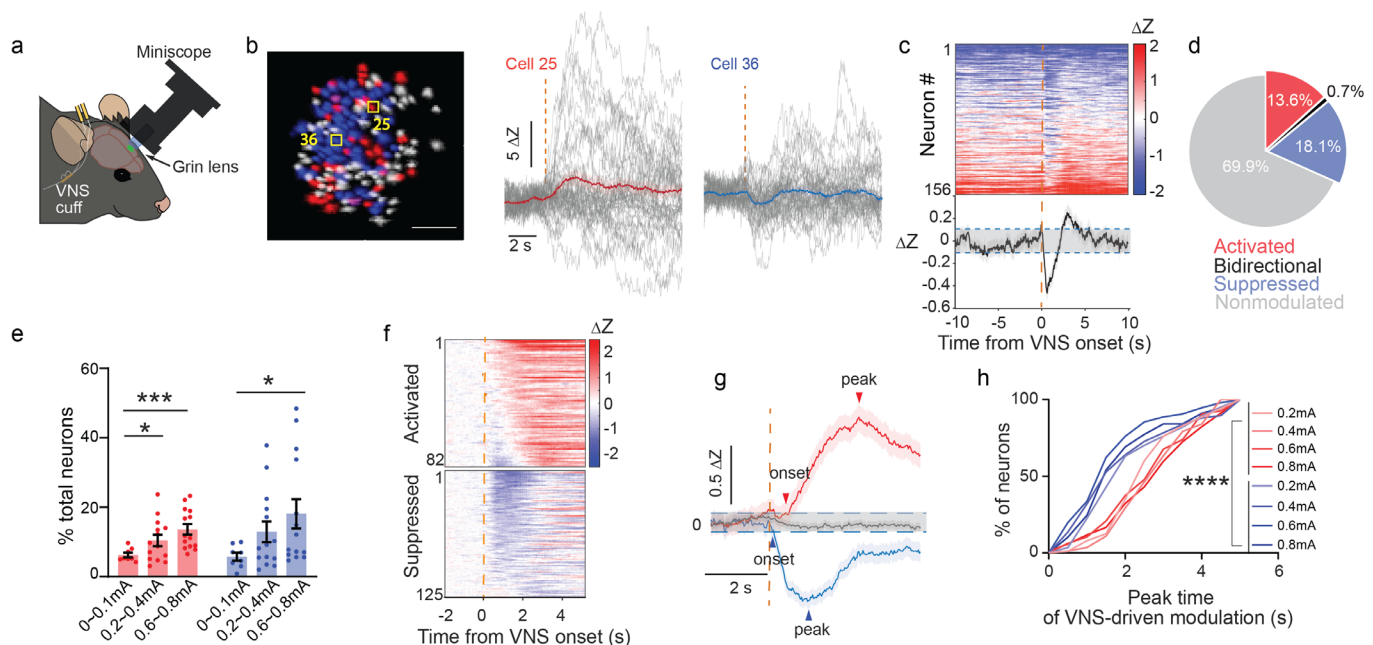

251 showing bidirectional modulation (**Fig. 6d**). The number of neurons modulated depended on stimulation intensity (**Fig.**  
252 **6e**).

253 Across the population of VNS-responsive neurons, we observed a temporal relationship between activation and  
254 suppression (**Fig. 6c,f**). The mean peak timing of the suppression precedes the activation by 1.2 s (Suppression: 1.6 s from  
255 VNS onset; Activation: 2.8 s; **Fig. 6g**), a relationship consistent across a range of behaviorally relevant stimulation  
256 intensities (**Fig. 6h**). Similarly, the onset of suppression preceding activation by 0.6 s (**Supp. Fig. 5c**). These together  
257 suggest that in the forelimb region of the mouse primary motor cortex, VNS first drives acute neural suppression, followed  
258 by activation in two separate subpopulation of neurons, without altering the mean population firing rate.

### 259 **Success VNS modifies the neural representation of reach outcome**

261 We next examined the influence of Success VNS on movement representation during early learning. The neural activity  
262 in M1 was measured by miniscope imaging in freely moving mice as they learned the skilled reach task. Each reach was  
263 subdivided into a reach and an outcome phase using post hoc analysis (**Fig. 7a**). The reach phase includes the outward paw  
264 movement from reach initiation to reach max (~100 ms) and the return movement from reach max to reach end (~200 ms).  
265 Reach outcome was typically detected 350 ms after reach max and 200 ms after reach end. As anticipated<sup>49-52</sup>, the average  
266 population activity was significantly modulated during movement (reach or outcome phase; **Fig. 7b**). Nearly half of all  
267 neurons were movement modulated, with 13.3% of all neurons modulated during reach and 31.7% modulated during  
268 success outcome. For success outcome-modulated neurons, roughly half were activated, and half were suppressed (success-  
269 activated:  $16.3 \pm 6.4\%$ ; success-suppressed:  $15.4 \pm 10.2\%$ ; **Fig. 7c**). The outcome representation of success differs from  
270 failure, both at the level of the population average response (**Supp. Fig. 6 a,b**) and individual neural responses (**Supp. Fig.**  
271 **6 c,d**).

272 During Success VNS, stimulation is delivered at reach outcome, and so the acute neural response to VNS is likely  
273 to overlap with the intrinsic response to success outcome. To accurately detect VNS-related neural activity, mice  
274 participated in two sessions of training, one with VNS and one without. These sessions were administered on a pseudo-  
275 randomized schedule (**Fig. 7d**), and the average neural response was compared between VNS and no-stimulation sessions.  
276 During VNS sessions, the success-activated neurons' average response was first attenuated, then slightly enhanced (**Fig.**  
277 **7e**). In contrast, success-suppressed (**Fig. 7f**), movement non-modulated (**Fig. 7g**) and failure-activated neural (**Supp. Fig.**  
278 **6f**) responses did not differ between VNS and no-stimulation sessions. Moreover, in VNS sessions, the percentage of  
279 success activated and suppressed neurons were not significantly different from no-stimulation sessions (**Supp. Fig. 6e**),  
280 suggesting that VNS modulates neurons that already represent success outcomes. These together suggest that Success VNS  
281 specifically modulates neurons already activated by success outcome.

282 To track the response of individual neurons to VNS, we cross-registered neuronal ROIs between the VNS and no-  
283 stimulation sessions (**Fig. 7h**). We found that, remarkably, ~80% of the success-activated neurons were modulated by VNS  
284 (**Fig. 7k**). Despite the overall attenuation of the population response (**Fig. 7e**), nearly half of individual neuronal responses  
285 were enhanced by VNS (43.3%; **Fig. 7i,k**), while a similar portion were attenuated (40.9%; **Fig. 7j,k**). We next considered  
286 the temporal dynamics of neural enhancement and attenuation of the success outcome response, to determine if they were  
287 similar to the dynamics of activation and suppression in the home cage (**Fig. 6g,h**). Indeed, the peak attenuation occurred  
288 with similar latency to home cage VNS suppression ( $1.85 \pm 1.20$  s vs.  $1.78 \pm 1.10$  s after VNS onset; **Supp. Fig. 6g**),

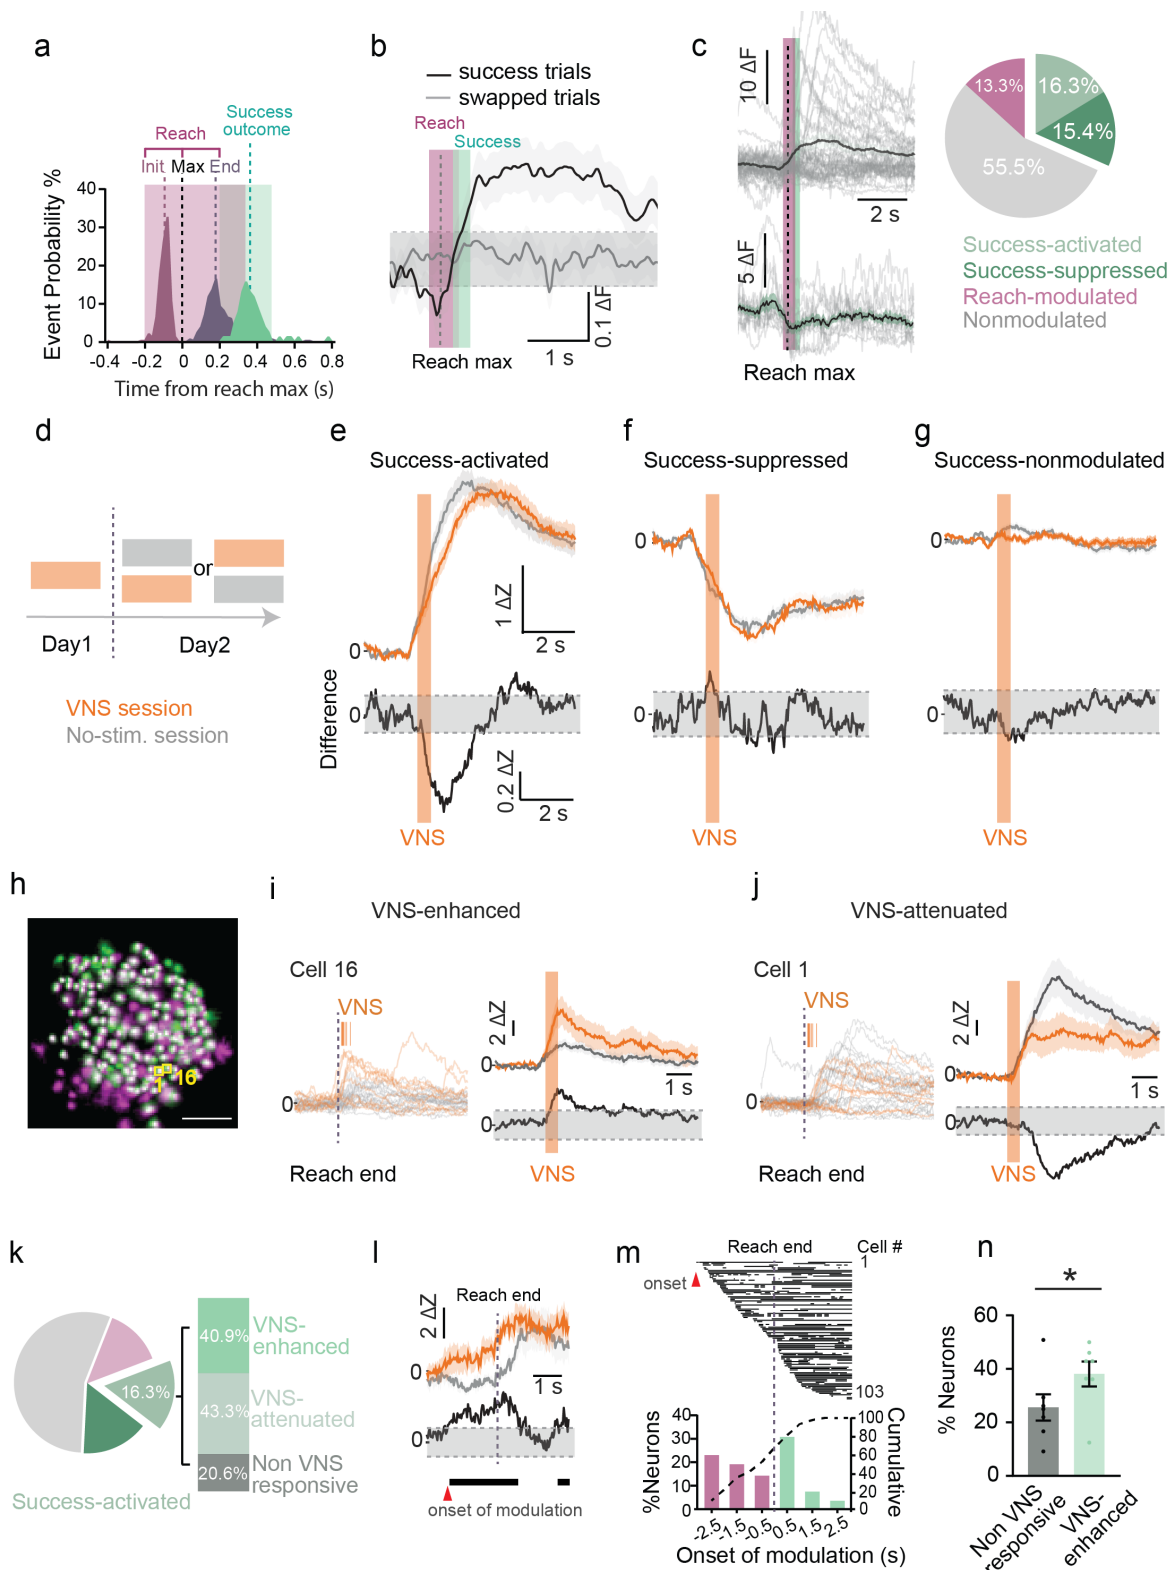

**Figure 7 | Outcome Success VNS selectively modulates activity of task activated M1 neurons in the reach task.**

**a**, Peri-event histogram of the task related events aligned at reach max (n = 6 control mice, day 4, n = 278 single-reach success trials). Dashed lines indicate median reach initiation (-93 ms), reach max (0 s), reach end (180 ms) and outcome recognition (360 ms). **b**, Average neural activity of success trials (black) and random control trials (grey, n = 488 neurons). Gray dashed line indicates 2 s.d. from the baseline mean. **c**, Left: representative neural responses: red success-activated, blue success-suppressed, grey individual trials. Right: % neurons modulated in the task (903 neurons). **d**, Assignment of VNS or no-stimulation sessions. **e-g**, Top: Average responses of success-activated (**e**, 115 and 101 neurons), success-suppressed (**f**, 122 and 92 neurons) and success-non-modulated neurons (**g**, 383 and 394 neurons) in VNS (orange) and in no-stimulation session (grey). Bottom: the difference trace. **h**, Registered neurons (white) in VNS (green) and no-stimulation session (Magenta). **i,&j**, Left: single trial responses in no-stimulation session and in VNS session (orange ticks: VNS onset). Right: the average and difference responses of the same neurons aligned by VNS onset. **k**, Percentage of success-activated neurons (n = 77 registered) that are enhanced (40.9 ± 13.7%) or attenuated (43.3 ± 21.2%) in VNS compared to no-stimulation session. **l**, One success-activated neuron modulated by VNS. Arrowhead: onset of increased activity. **m**, Onset of VNS-driven modulation. **n**, % neurons modulated in reach in VNS-non-modulated vs. VNS-enhanced neurons.

290 followed by peak enhancement at a similar latency to peak activation in the home cage context ( $2.65 \pm 1.50$  s vs.  $2.74 \pm$   
291  $1.20$  s after VNS onset; **Supp. Fig. 6g**), demonstrating a similar temporal structure to the VNS response both during and  
292 outside of the reach behavior.

293 Having established that the majority of success-activated neurons are acutely modulated by VNS during success  
294 outcome, we next wanted to explore if the activity of these neurons is altered beyond the acute response to VNS. To  
295 measure neural activity across the entire reach, activity was normalized to a pre-reach baseline epoch, and movement  
296 related activity was compared between the Success VNS and no-stimulation sessions. Neural activity during the VNS  
297 session often differed across the reach phase (**Fig. 7l**), with an onset of modulation occurring prior to VNS in nearly 60%  
298 of success-activated, VNS-modulated neurons (**Fig. 7m**). More broadly, during the VNS session, all VNS-enhanced  
299 neurons are more likely to be active during the reach phase than non-VNS-modulated neurons ( $38.1 \pm 4.7\%$  vs.  $25.6 \pm$   
300  $4.9\%$ ; **Fig. 7n**). Since VNS alters neural response during the entire reaching movement, this suggests that VNS effects on  
301 neural activity persist beyond those seen during acute modulation.

302

### 303 VNS-driven acute neural modulation is mediated through acetylcholine receptors (AChRs)

304 Because the effects of VNS on motor learning are mediated by cholinergic signaling, we next set out to determine if the  
305 effects of VNS on neural activity in M1 likewise depend on acetylcholine. To test this, we injected awake, freely moving  
306 animals with a systemic acetylcholine receptor antagonist cocktail and measured the acute neural response to VNS in M1.  
307 The baseline acute VNS response in M1 was first measured in the home cage, then 15 minutes following administration of  
308 AChR antagonist cocktail, and finally in a washout session  $\sim 24$  hours later (**Fig. 8a**). The percentage of VNS-modulated  
309 neurons was not changed by AChR antagonism (**Supp. Fig. 7**). However, the average response amplitude of VNS

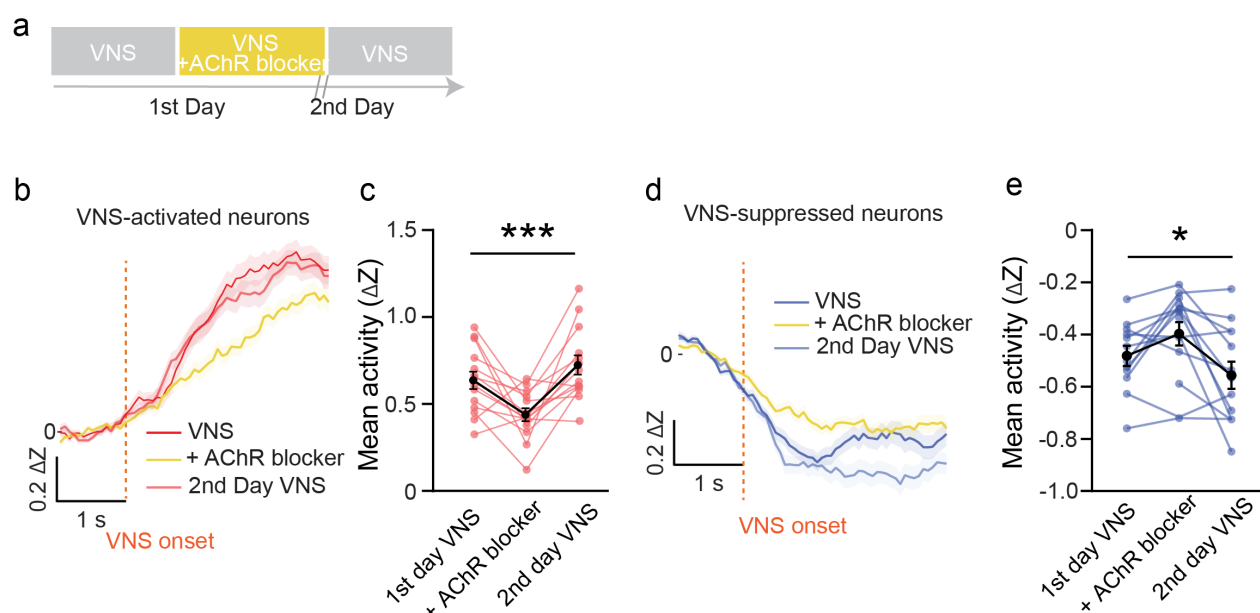

**Figure 8 | VNS driven acute neural modulation is mediated through AchRs.**

**a**, Diagram of experimental design: three sessions including a control VNS session in home cage, VNS session with AChR blocker, recovery VNS session on the 2nd day. **b,d**, Average neural activity of VNS-activated neurons (**b**,  $n=104\text{--}116$  neurons) or VNS-suppressed neurons (**d**,  $n=124\text{--}143$  neurons) in control VNS session, VNS session with AChR blocker and the 2nd day recovery VNS session. **c**, Average neural activity comparison of VNS-activated neurons quantified from 0.8 to 2.8 s after VNS onset, defined based onset and peak delay of VNS-driven neural activation in Figure. 6 ( $N=7$  mice  $\times$  two repeats each mouse, repeated measures ANOVA,  $p<0.001$ ). **e**, Average neural activities comparison of VNS suppressed-neurons quantified from 0.2 to 1.6 s from VNS onset defined based onset and peak delay of VNS-driven neural suppression in **Fig. 6** ( $N=7$  mice  $\times$  two repeats each mouse, Repeated measures ANOVA,  $p=0.02$ ).

310 modulated neurons, both activated and suppressed, were reduced by cholinergic antagonism (**Fig. 8b-e**), demonstrating  
311 that AChR mediated signaling is required for VNS-driven acute neural activation and suppression.

312

## 313 **Discussion**

314 Vagus nerve stimulation paired with rehabilitation is proposed as a therapeutic treatment for a wide range of neurologic  
315 conditions, yet the mechanism by which VNS may alter neuronal activity to influence behavior remains relatively  
316 unexplored. In this study, we establish that VNS optimally enhances motor learning when paired with successful reach  
317 attempts, suggesting a reinforcement learning mechanism. Optogenetic inhibition of cholinergic neurons in the basal  
318 forebrain is sufficient to eliminate the effects of Success-VNS on motor learning and to reverse VNS-driven expert reach  
319 trajectory selection. Longitudinal *in vivo* imaging of neurons of the primary motor cortex shows that VNS selectively  
320 modulates neurons that represent reach outcome, and the effects of VNS on M1 neural activity depend on cholinergic  
321 signaling. Together, these results demonstrate that Success-VNS accelerates motor learning through reinforcement,  
322 mediated by cholinergic-dependent changes in neural representation and reach kinematics.

323

### 324 **VNS paired with reach success optimally enhances motor learning**

325 To our knowledge, we are the first to demonstrate the importance of pairing VNS to movement outcome to enhance motor  
326 learning. VNS induces cortical map plasticity in healthy animals when paired with specific movements<sup>20</sup> or auditory tones<sup>21</sup>  
327 but has not been shown to improve task performance<sup>20,22</sup>. We find that VNS paired with a successful reach, but not reach  
328 initiation, enhances motor learning, indicating a role for VNS in reinforcement learning. Endogenous activity of the vagal  
329 nerve has been linked to reward and motivation<sup>53</sup>, and VNS in human subjects drives motivation towards reward<sup>54</sup> and  
330 improves reinforcement learning<sup>55</sup>. However, VNS does not seem to activate the classical dopaminergic reward pathway<sup>36</sup>,  
331 as conditioned place preference test results indicate that VNS is not inherently rewarding or aversive. Instead, VNS may  
332 augment reinforcement cues, leading to improved selection of the expert trajectory<sup>56,57</sup> and the associated neural ensembles  
333 that underlie those movements<sup>58-60</sup>. By augmenting reinforcement cues, VNS may help to select the appropriate neural  
334 circuits, strengthening those connections for lasting improvements in functional outcome.

335 The importance of VNS timing appears to differ among learning phases. During early learning, Success VNS has  
336 a unique ability to improve reach learning. Moreover, Random VNS delivered during early learning impairs reach learning,  
337 suggesting that poorly timed VNS can disrupt normal learning processes. During late learning, Success VNS maintains  
338 improved performance over control animals, while the subset of stimulated trials in Reach VNS also show performance  
339 improvements over controls (this improvement is abolished when all trials are included). In expert animals, both Success  
340 and Reach VNS provide short-term improvements over unstimulated blocks of trials. Thus, it appears critical that VNS  
341 must be paired with reach outcome during early learning, but there is more flexibility in the timing of VNS pairing during  
342 the rehearsal of a known task.

343 How might reinforcement-paired VNS contribute to skilled motor learning? Motor learning travels along an  
344 exploration-exploitation axis, with early exploration, expressed as motor variability, reducing as the motor behavior  
345 consolidates onto an expert solution<sup>61-63</sup>. Moreover, early learning motor variability predicts improved later performance  
346 of the expert motor solution<sup>57,64,65</sup>. This is generally referred to as an error-driven learning, in which increased exploration  
347 allows for faster identification of the expert solution. Reward is also known to influence the exploration-exploitation



348 relationship. Generally called reinforcement-driven learning, in this process conditions of increased reward frequency lead  
349 to reduced variability and increased consolidation of movement trajectory onto an optimal motor solution<sup>56,63,66</sup>. Our results  
350 show that paired VNS does not increase variability in early learning, but instead improves kinematic consolidation onto an  
351 expert reach. This leads us to believe that in this context, VNS acts via reinforcement-driven learning to increase the  
352 exploitation of the expert solution, without increasing early motor variability. Future experiments are needed to explore if  
353 VNS can reinforce movements without association to a food reward.

354

### 355 **VNS-driven motor learning is mediated by cholinergic signaling**

356 VNS activates multiple neuromodulatory systems in the central nervous system<sup>16,67,68</sup> and the effects of VNS on cortical  
357 plasticity are mitigated with lesions of neuromodulatory nuclei, including the locus coeruleus, raphe nucleus and the  
358 cholinergic BF<sup>15,16</sup>. While each of these neuromodulators play a role in learning, cholinergic neuromodulatory systems are  
359 critical for use-dependent plasticity<sup>39,69–72</sup>, are most closely associated with reinforcement signaling<sup>18,38</sup>, and encode task  
360 outcome<sup>19,73</sup>. Lesion<sup>17,74</sup> or pharmacological inhibition<sup>75</sup> of cholinergic neurons is detrimental to motor learning and VNS-  
361 enhanced motor rehabilitation<sup>9</sup>. Leveraging the temporal precision of optogenetic suppression of cholinergic neurons, we  
362 find that a brief cholinergic inhibition is sufficient to prevent VNS-driven enhancement in motor learning. This suggests  
363 that the effects of Success VNS are mediated through phasic cholinergic signaling in the BF, and is consistent with the role  
364 of the cholinergic BF to encode outcome salience<sup>18,19,73</sup>.

365 Only limited evidence exists demonstrating an anatomical or functional connection between the vagus nerve and  
366 the cholinergic BF<sup>76</sup>. Using opto-tagging approaches, we were able to demonstrate robust functional connectivity between  
367 the BF and the vagus nerve. Stimulation of the vagus nerve elicited robust responses in nearly half of the cholinergic and  
368 non-cholinergic units recorded under anesthesia and more than 40% of the units recorded in awake animals. The variable  
369 timing of BF neuronal responses to VNS suggests the involvement of a multi-synaptic pathway, possibly through the locus  
370 coeruleus (LC), which is known to send direct projections to the BF<sup>77–79</sup> and is activated by VNS<sup>13,80</sup>.

371

### 372 **Motor cortical neurons are modulated by VNS via cholinergic activity**

373 Neurons in the primary motor cortex represent movement preparation and execution for dexterous movements<sup>48,81,82</sup>.  
374 During motor learning, these neural representations are updated to improve motor output<sup>51,83,84</sup> by incorporating feedback  
375 from error and reinforcement signals generated throughout multiple regions of the central nervous system, including  
376 cortical regions<sup>58,85–87</sup>. Recent work demonstrated that, in addition to movement preparation and execution, M1 pyramidal  
377 neurons also report movement outcome. Neurons in superficial L2/3 of M1 represent success and failure, independent of  
378 kinematics and the food reward consumption<sup>52</sup>. Our data demonstrate that Success VNS attenuates the population  
379 representation of a success outcome by selectively modulating success-outcome responsive neurons. This same neural  
380 population is also more likely to have altered representation of movement preparation and reach execution, suggesting that  
381 VNS modulates neural activity beyond the acute response to stimulation. The specificity of the population of neurons that  
382 are modulated by Success VNS may indicate that VNS adds selectivity to outcome representation, which optimizes  
383 outcome signals for enhanced learning.

384 The relative selectivity of the effects of Success VNS on movement representation are somewhat in contrast to  
385 recent observations of widespread, long-lasting excitatory responses to VNS<sup>14</sup>. However, in the previous study, VNS

386 elicited locomotion and whisking, both of which correlate to increased general arousal and widespread cortical activation<sup>88–</sup>  
387 <sup>90</sup>. This makes it difficult to disentangle direct VNS effects from changes in arousal. In contrast, another recent work  
388 demonstrated a VNS-driven suppression of neural response to an auditory tone that persisted even after arousal state was  
389 regressed from the neural response<sup>91</sup>. Our trial design controls for movement state, as the comparison between the VNS  
390 trial and no-stimulation trial occurs at the exact same reach position, and VNS did not produce any noticeable acute motor  
391 response. By eliminating the confound of behavioral states such as locomotion or quiet resting, we can detect that VNS  
392 produces an initial suppression of the outcome response followed by excitation. This effect is seen only in neurons that  
393 respond to outcome, indicating that when applied during a reach, VNS acts on a specific population of neurons that are  
394 already engaged in the representation of reach outcome.

### 395 396 **Optimizing VNS to treat neurological conditions**

397 Through an improved understanding of the mechanisms of VNS, the use of this therapy to treat a range of neurological  
398 conditions can be optimized to increase clinical efficacy. For example, the recently approved VNS therapy for stroke pairs  
399 stimulation with movement, perhaps could be enhanced by pairing VNS only with movements that meet a success criterion.  
400 Similar strategies could be implemented for movement rehabilitation to treat spinal cord injury or peripheral injury. In  
401 addition, our results point to a concern that improperly paired VNS could lead to maladaptive plasticity. We find that  
402 random VNS stimulation impairs early learning. For clinical application in vulnerable populations, such as patients with  
403 neuropsychiatric conditions or in pediatric populations, maladaptive plasticity has the potential for harm. Understanding  
404 how VNS interacts with neural circuits, including both the cholinergic basal forebrain and motor cortical populations,  
405 allows for exploration of stimulation protocols to more directly target the effect of interest. For instance, models that can  
406 predict how stimulation protocols will engage specific vagal fiber types<sup>92–94</sup>, could be used to test differential target  
407 engagement in the brain. Alternatively, direct brain stimulation of targets, such as the basal forebrain, could be used to  
408 provide more specific neuromodulation to achieve key therapeutic results. Lastly, less invasive techniques, such as  
409 auricular VNS might still be able to convey therapeutic benefits if their stimulation protocols and target activation within  
410 the central nervous system is optimized<sup>95,96</sup>. The data presented here provide a framework for dissecting the role of VNS  
411 within specific therapeutic indications, with the ultimate goal of improving therapeutic delivery and patient outcomes.

### 412 413 **Conclusion**

414 In conclusion, we demonstrated that VNS augments reinforcement cues to enhance skilled motor learning and accelerate  
415 kinematic consolidation on an optimal motor plan in healthy animals. VNS alters neural coding of outcome in a select  
416 neural population in motor cortex and modulates neuronal activity of this population across the entire reach. The behavioral,  
417 kinematic, and motor representation effects of VNS are mediated by phasic cholinergic activity. Understanding the  
418 behavioral and circuit mechanisms of VNS allows for future optimization of rehabilitation protocols and new avenues for  
419 the use of cholinergic manipulation to treat neurologic conditions.

### 420 421 **Acknowledgments**

422 This work was supported by grant from DARPA Targeted Neuroplasticity Training (TNT): HR0011-17-2-0051. The  
423 Optogenetics and Neural Engineering (ONE) Core at the University of Colorado School of Medicine provided engineering

424 support for this research. The IDEA Core provided data pipeline and software support for this research. The Animal  
425 Behavior Core provided support for conditioned place preference experiments. These cores are part of the  
426 NeuroTechnology Center, funded in part by the School of Medicine and by the National Institute of Neurological Disorders  
427 and Stroke of the National Institutes of Health under award number P30NS048154. We thank Sean Hansen for technical  
428 assistance in Matlab and manuscript proofreading; Eashan Sahai, Nicole Chen and Melanie Zhou for technical assistance  
429 in mice training and behavior video curation and Benjamin Temple for early technical assistance with optogenetic  
430 procedures.

431

#### 432 **Author Contributions**

433 SB, JH, XP and CW contributed to the text of the manuscript. JH, SB and CW designed and conducted behavioral tests.  
434 SB, JH, DD and CW designed and conducted electrophysiological recordings. XP and CW designed and conducted calcium  
435 imaging experiments. XP and CW designed and conducted pharmacological experiments. WRW and SB constructed and  
436 tested the CLARA behavioral system. KW conducted CPP tests. SB, JH, XP and RH performed surgeries for the  
437 experiments. SB, JH, XP and CW analyzed experimental data and performed statistical tests.

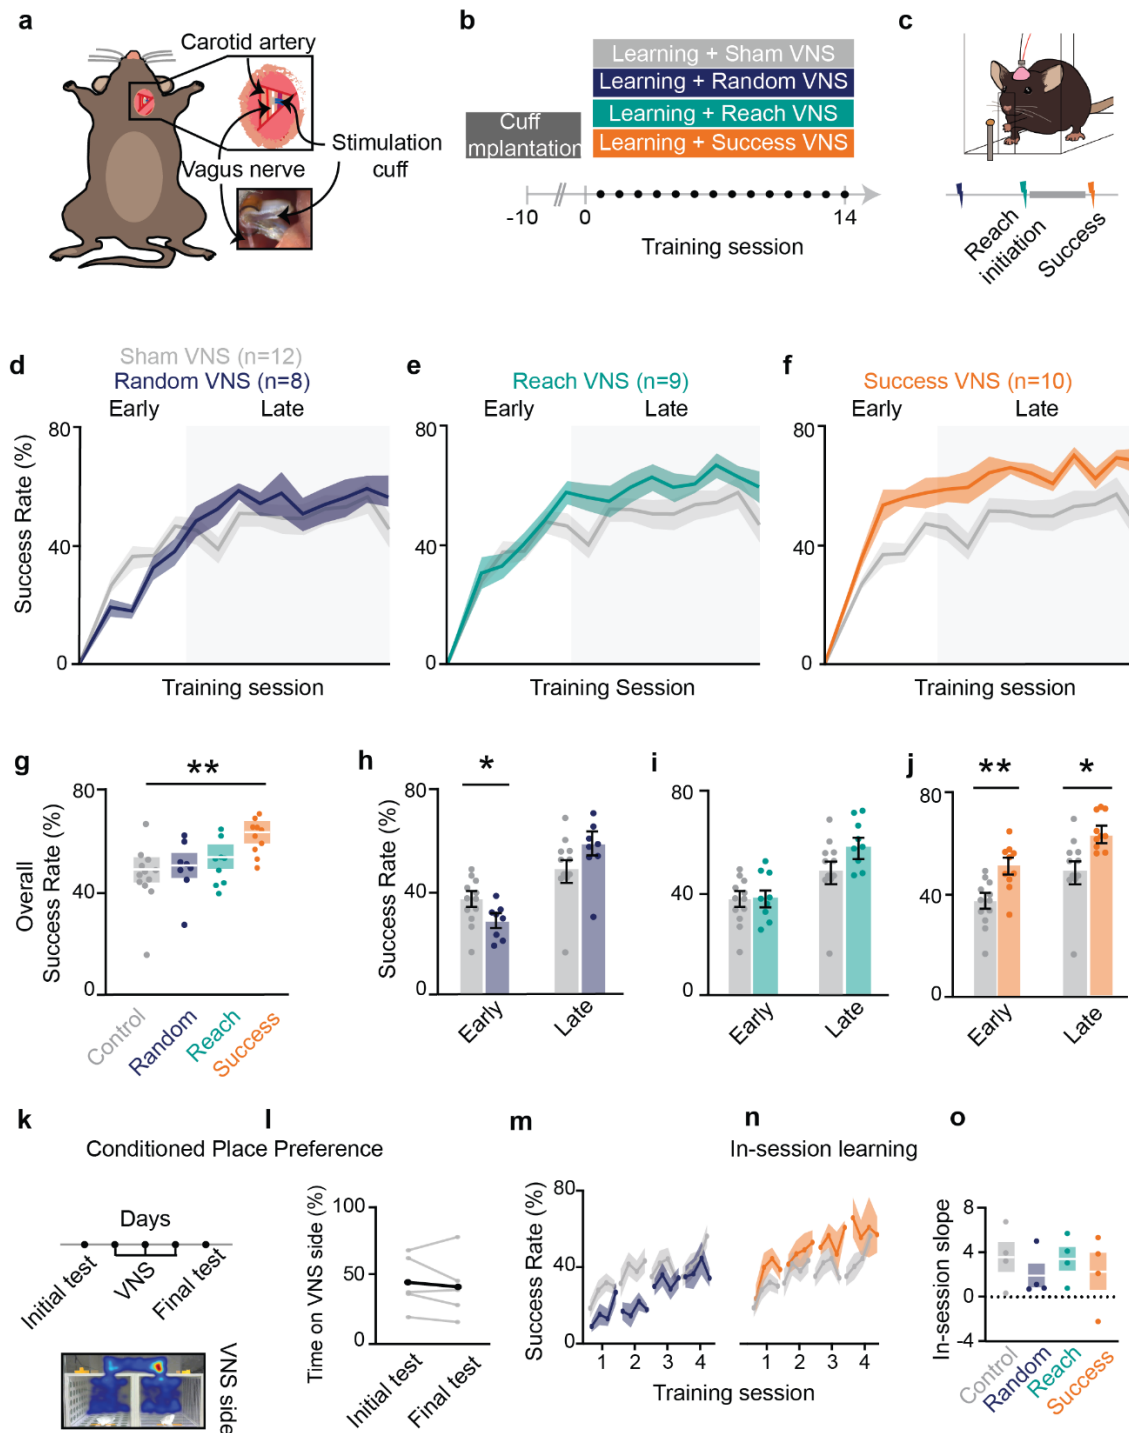

439 **Figure 1 | VNS modulates forelimb reach learning and requires temporally specific stimulation.**  
 440 **a**, VNS surgical approach **b**, Behavior timeline **c**, Stimulation protocol, with Reach and Success VNS applied  
 441 before and after reach, respectively. **d-f**, Random VNS, Reach VNS, and Success VNS success rate across 14  
 442 sessions of training. **g**, Comparison of mean performance across all days between control and stimulated groups  
 443 (Success VNS:  $p=0.0065$ ,  $f=9.24$ , Random VNS:  $p>0.05$ , Reach VNS:  $p>0.05$ , REML). Shaded boxes denote  
 444 s.e.m. **h**, Comparison of mean success rate for control and Random VNS mice during early ( $p=0.028$ ,  $f=7.07$ ,  
 445 Student T test) and late learning ( $p>0.05$ ). **i**, Comparison of mean success rate for control and Reach VNS mice  
 446 during early and late learning ( $p>0.05$ ). **j**, Comparison of mean success rate for control and Success VNS mice

447 during early ( $p=0.0031$ ) and late learning ( $p=0.0126$ ). **k&l**, VNS mice performed a conditioned place preference  
448 test after 3 days being stimulated in one of two distinct rooms. **m&n**, In-session learning trajectories for each  
449 group. **o**, Comparison of within session learning between all groups across 4 days of learning. \* $p < 0.05$ ,  
450 \*\* $p < 0.01$ , \*\*\* $p < 0.001$  bars and error bars represent the mean  $\pm$  s.e.m.

451

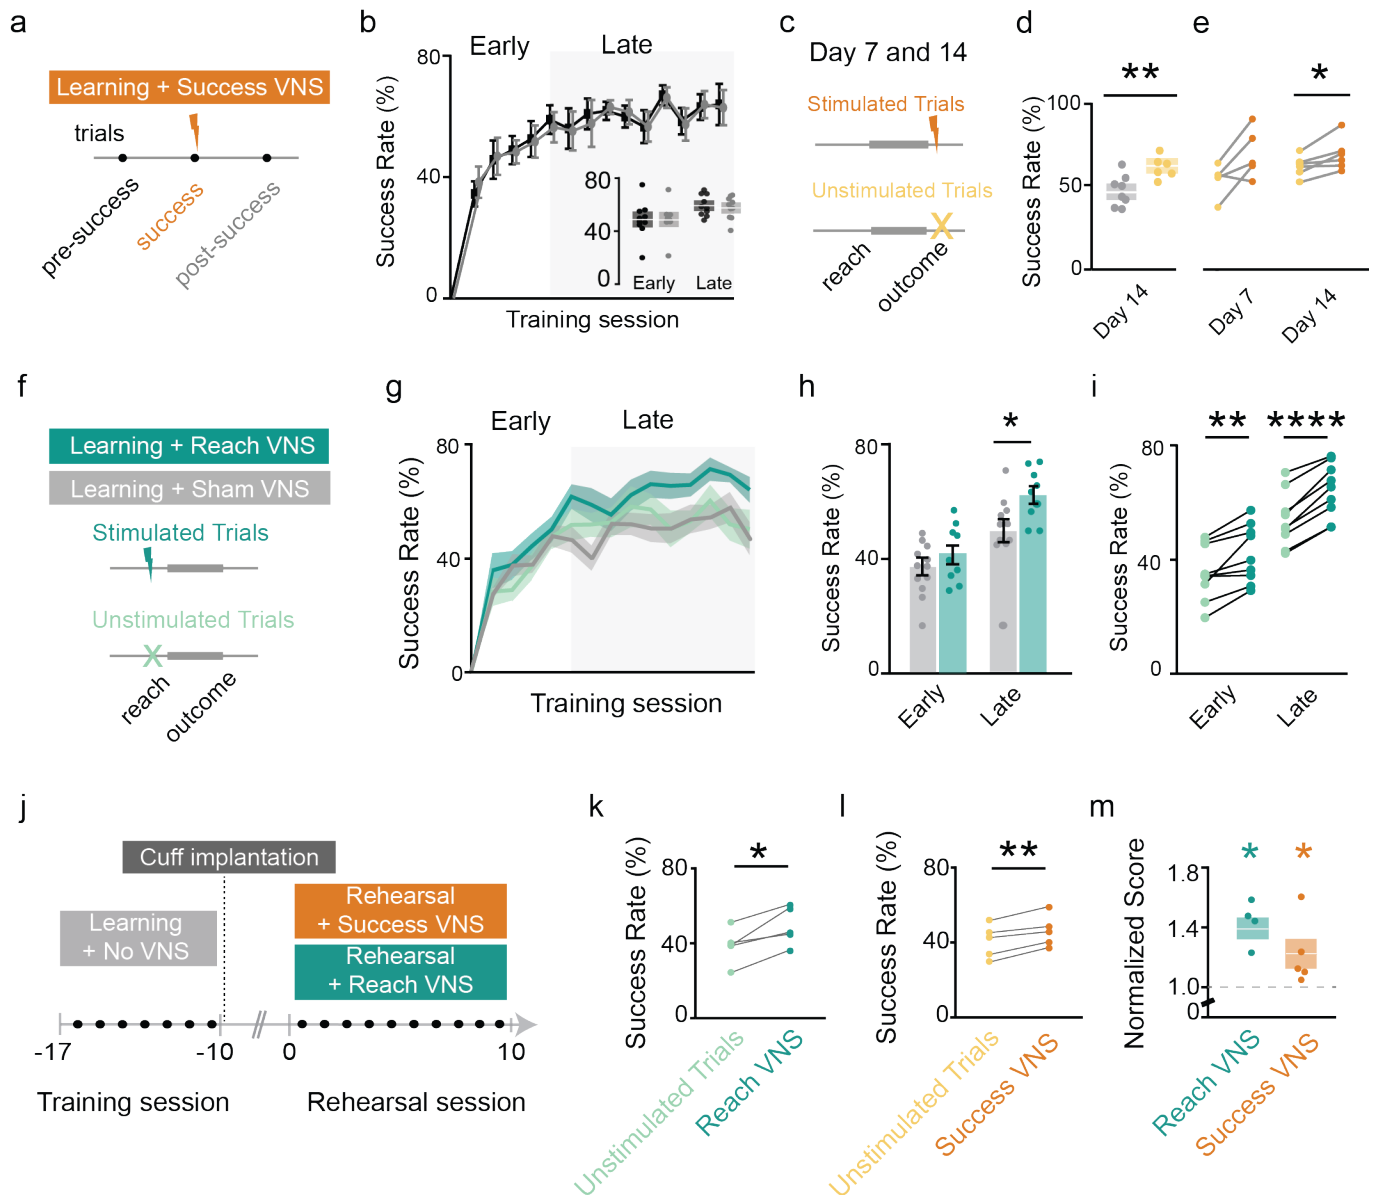

**Figure 2 | VNS improves success rate within sessions and in learned mouse during rehearsal of forelimb reach task.**

**a**, Trials before and after a stimulated success are investigated in success VNS. **b**, Comparison of success rate for reaches preceding or following stimulated reach. **c**, For Success VNS, day 7 and 14 trials are divided into equal blocks of unstimulated and stimulated trials. **d**, Comparison of unstimulated (light orange) and sham (grey) trials on day 14 ( $p=0.0059$ ,  $t=3.34$ , Student's T test). **e**, Comparison of stimulated (dark orange) and unstimulated (light orange) trials on days 7 & 14 (Day 7:  $p>0.05$ ; Day 14:  $p=0.0499$ ,  $t=2.57$ , Ratio paired t test). **f**, Reach VNS schematic. **g**, Success rates across learning training sessions for Sham (grey), Stimulated Reach VNS (dark green), and Unstimulated Reach VNS (light green). **h**, Comparison of Stimulated Reach VNS and Sham VNS trials in early ( $p>0.05$ ) and late learning ( $p=0.024$ ,  $t=2.47$ , Student's T test). **i**, Comparison between stimulated Reach VNS and unstimulated Reach VNS trails in early ( $p=0.004$ ,  $t=3.98$ , paired t test) and late learning ( $p<0.0001$ ,  $t=10.08$ , paired t test). **j**, Success VNS and Reach VNS applied during rehearsal of reach task in trained mice. **k**, Stimulated Reach VNS trials improve success rate during rehearsal ( $p=0.015$ ,  $t=4.058$ , paired t

465 test). **l**, Stimulated Success VNS trials improve success rate during rehearsal ( $p=0.005$ ,  $t=5.62$ , paired t test). **m**,  
466 Normalized improvement of Stimulated Reach VNS ( $p=0.047$ ,  $t=3.56$ ) and stimulated Success VNS trials  
467 ( $p=0.028$ ,  $t=4.16$ ) compared to unstimulated trials (Sidak's multiple comparison's test in RM one-way ANOVA).  
468 \* $p < 0.05$ , \*\* $p < 0.01$ , \*\*\* $p < 0.001$ ; bars and error bars represent the mean  $\pm$  s.e.m.

469

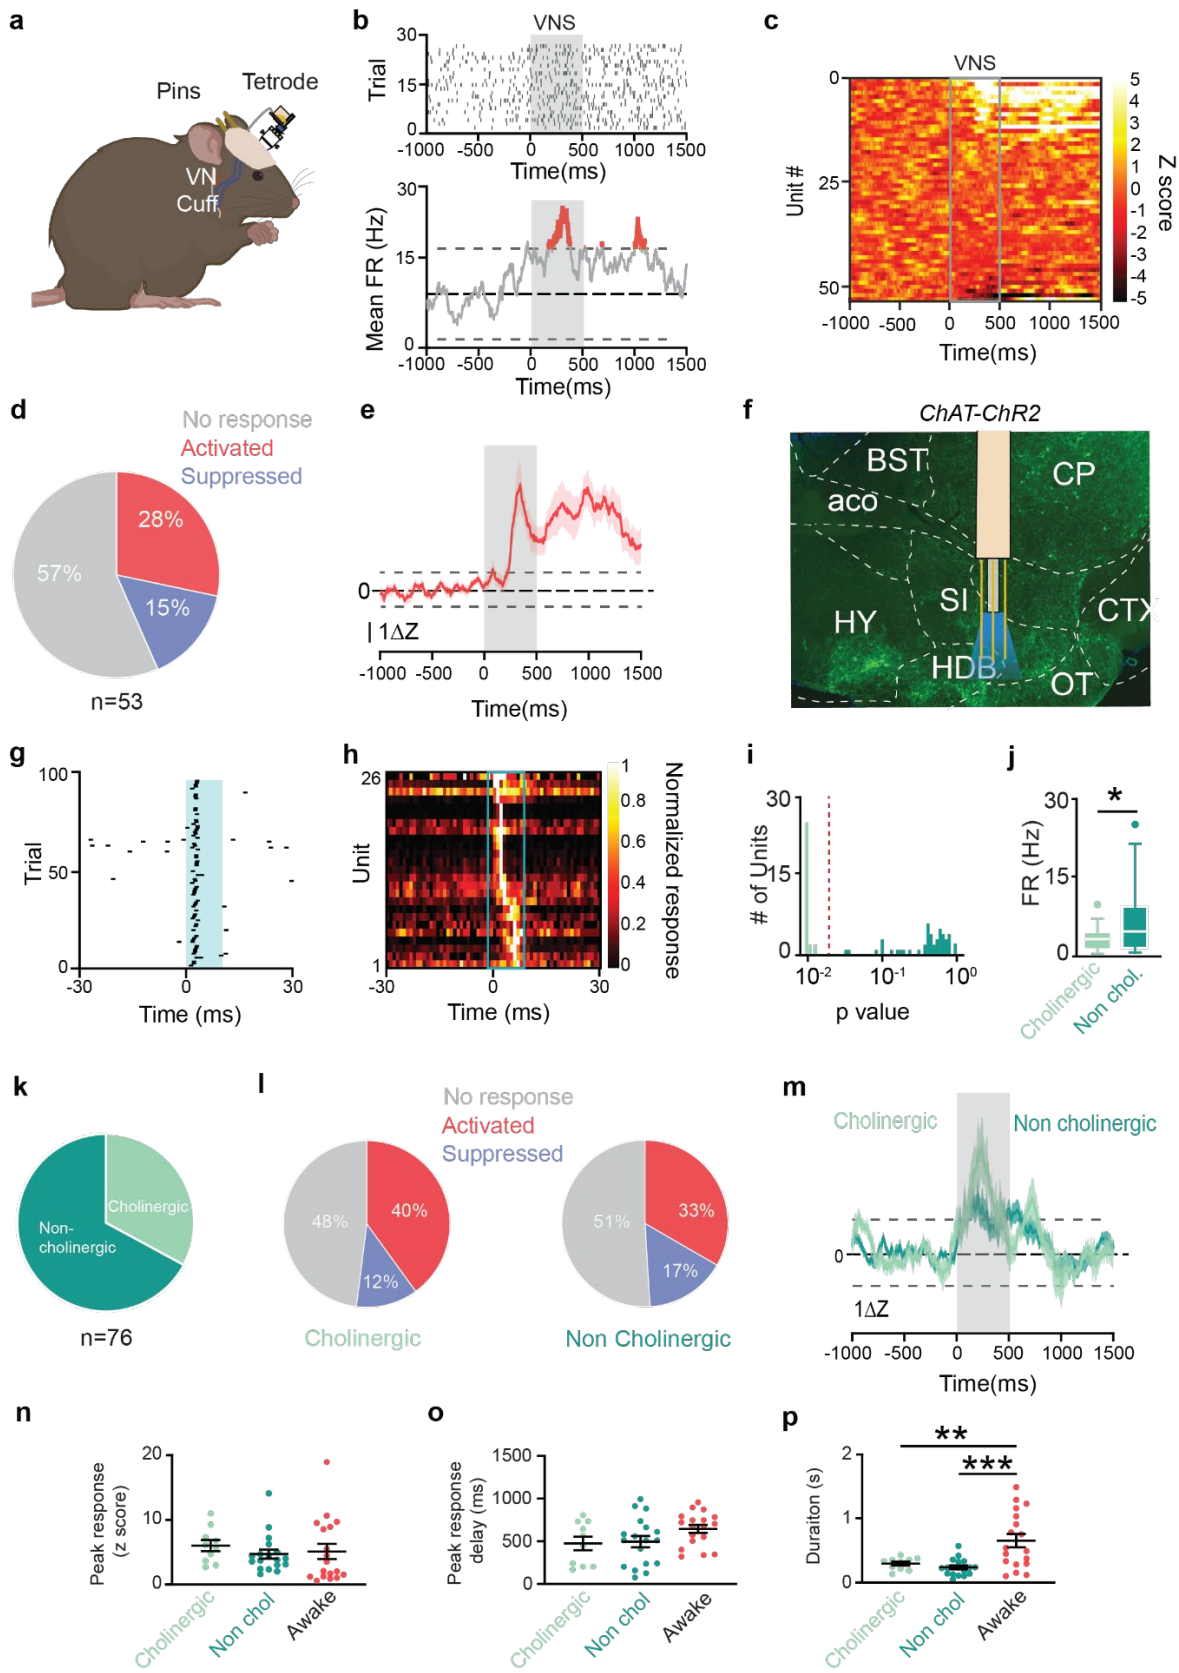

471 **Figure 3 | VNS drives BF neural activity in anesthetized and awake mice.**

472 **a**, Tetrodes were implanted in the left BF of mice and recordings were obtained during awake behavior. **b**,  
473 Example raster (top) and average firing rate from a response to VNS. Grey box denotes stimulus delivery. **c**,  
474 Average responses of all recorded neurons to VNS (grey box). **d**, Percent of neurons that respond to VNS (N =



475 5 mice, 53 neurons). **e**, Average activity of all ‘activated’ neurons in response to VNS. Dashed lines mark  
476 significance, shading represents SE. **f**, Extracellular recordings were obtained using optrodes were targeted at  
477 the HDB in *Chat-ChR2* transgenic mice while under light anesthesia. Green fluorescence denotes the presence  
478 of ChR2. **g**, Example cholinergic neuron responding consistently to pulses of 488 nm light. **h**, Average activity  
479 of all cholinergic neurons during opto-tagging. Each row represents a neuron. **i**, Stimulus-associated latency tests  
480 (SALT) separate light responsive neurons from non-light responsive neurons. **j**, Mean baseline FR of cholinergic  
481 and non-cholinergic neurons ( $p=0.013$ ,  $N = 5$  mice, 53 neurons). **k**, Percent of neurons categorized as cholinergic  
482 (light green) and non-cholinergic (dark green) ( $N = 6$  mice, 76 neurons). **l**, Percent of units that are VNS-  
483 responsive in cholinergic (left) and noncholinergic (right) populations. **m**, Average response to VNS for all  
484 ‘activated’ neurons. **n**, Mean peak activation during VNS. **o**, Average delay of peak activation from VNS onset.  
485 **p**, Mean duration of significantly elevated activity after VNS (cholinergic vs. awake  $p=0.0087$ , non-cholinergic  
486 vs. awake  $p=0.0003$ ).

487

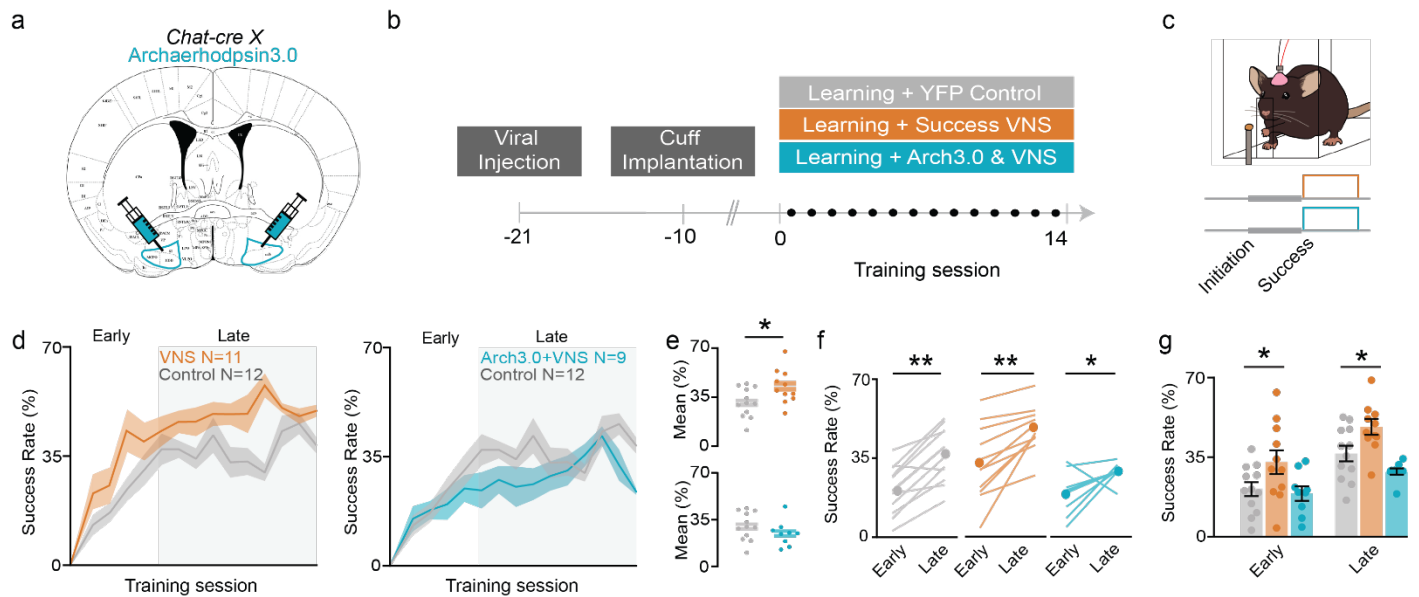

489 **Figure 4 | Success-paired VNS motor learning enhancement requires cholinergic neuromodulation.**  
 490 **a**, A subset of VNS-implanted *Chat-Cre* transgenic mice also received injections of viral constructs containing  
 491 Archaerhodpsin3.0 bilaterally in the BF (right). Mice were chronically implanted with bilateral fiberoptic  
 492 cannulas for light delivery. **b**, Timeline of experimental set up and training. Each training session lasts for 20  
 493 minutes. **c**, Depending on cohort, mice receive VNS, or continuous 532 nm light and VNS simultaneously, after  
 494 successful reach attempts. **d**, Average success rate for all mice over the course of learning (VNS N=11,  
 495 Arch+VNS N=9, Control N=12). **e**, Mean performance across all days between VNS and control (p=0.0409  
 496 (top)), and Arch+VNS and control (p>0.05 (bottom)). **f**, Mean success rate of all groups between early and late  
 497 phases (Control p=0.0001, VNS p=0.0009, Arch VNS p=0.0379). **g**, Mean success rate for control and VNS  
 498 mice during early (p=0.0458) and late (p=0.0001) learning phases and control and Arch+VNS mice (p>0.05).  
 499

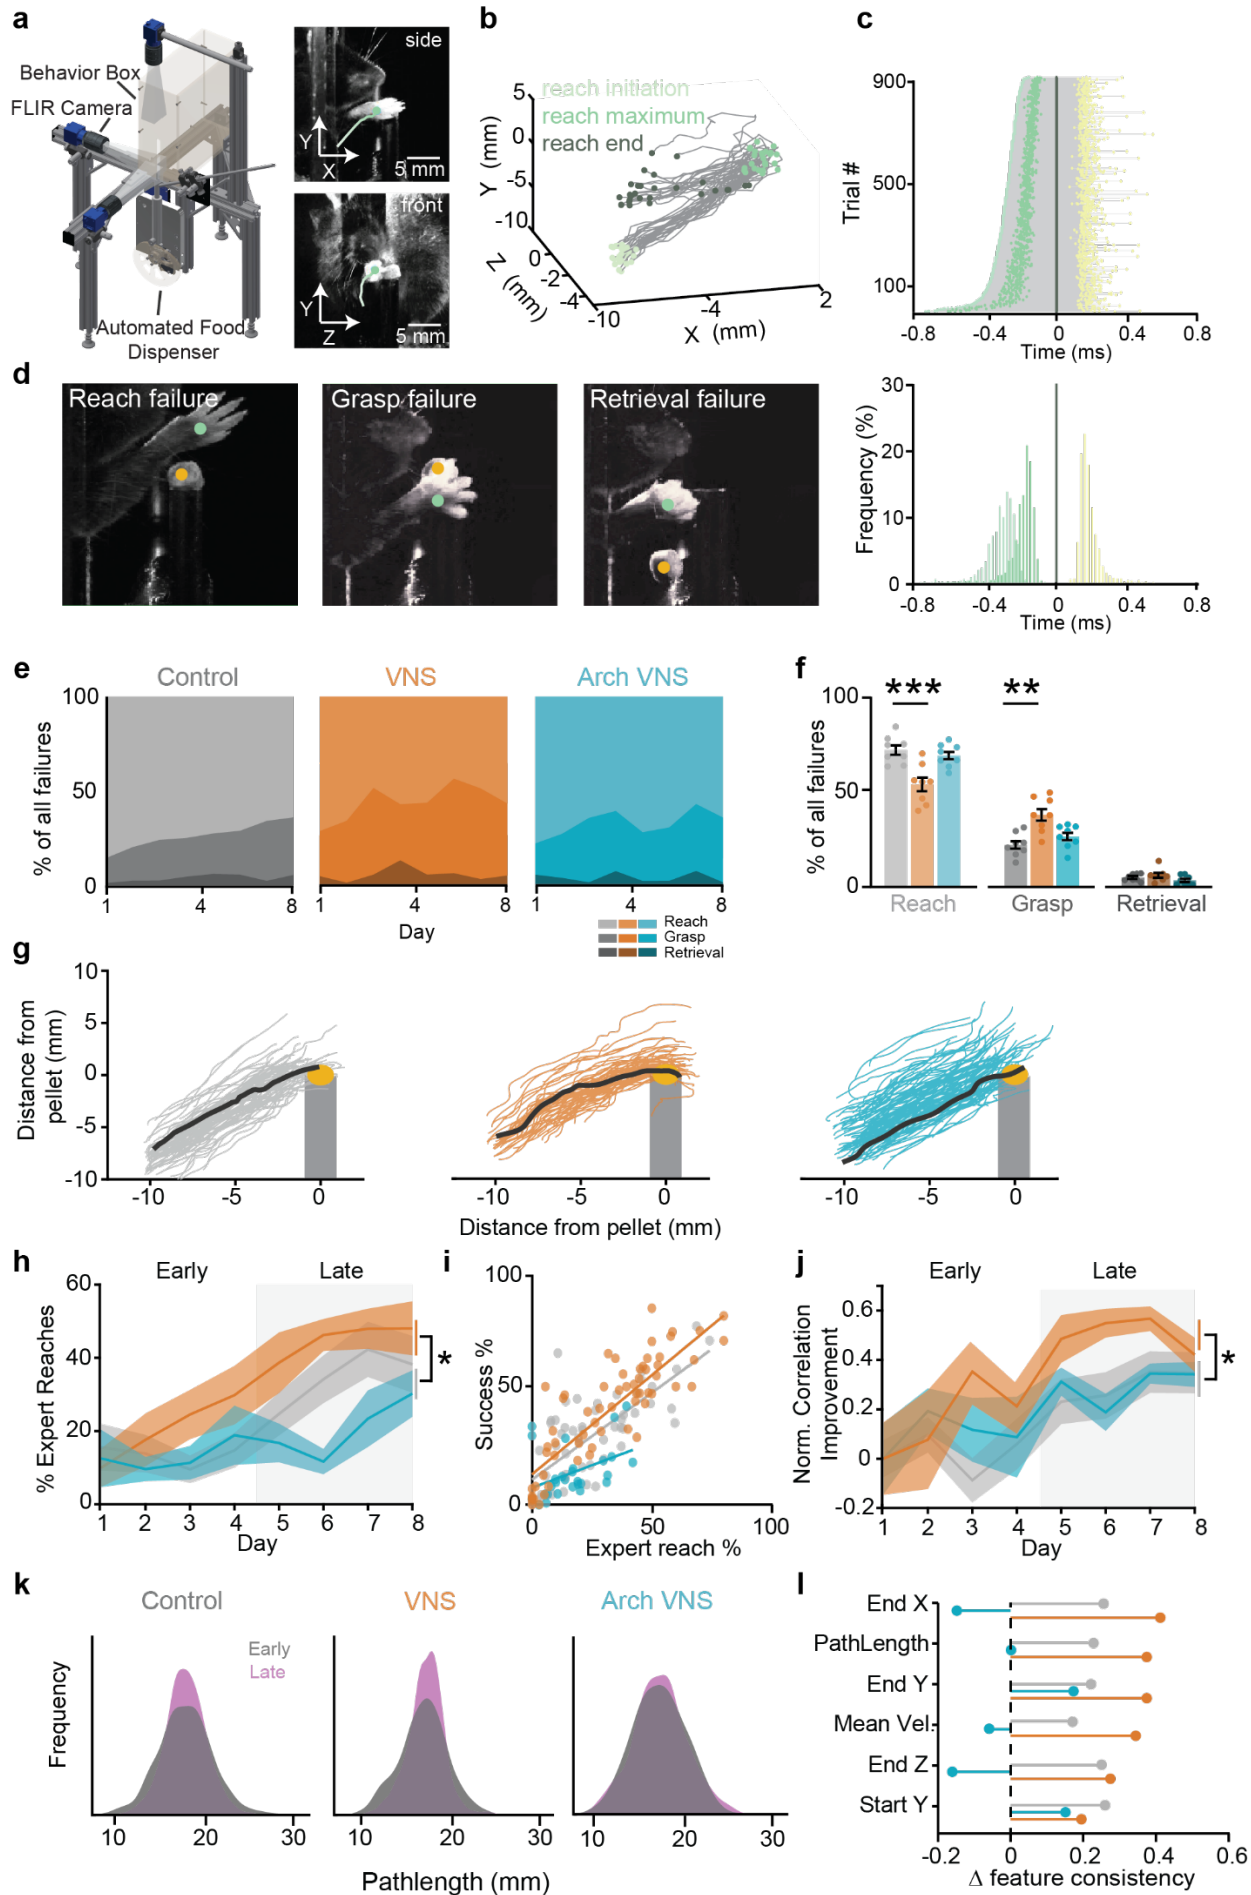

501 **Figure 5 | VNS improves performance through improved consolidation of reach trajectory.**  
502 **a**, The Closed-loop automated reaching apparatus (CLARA) provides 3D tracking of the paw and pellet. **b**, A  
503 custom CLARA data pipeline automatically identifies reaching events (one mouse one control session). **c**,  
504 CLARA rapidly delivers stimulation after reach end in a closed-loop fashion ( $180\pm 5\text{ms}$ ). Top: duration of all  
505 stimulated control trials, yellow dot denotes stimulus delivery. Bottom: a histogram of reach timepoints  
506 normalized to reach end. **d**, Example images of the three subcategories of failed reaches (see METHODS). **e**,  
507 Breakdown of failure outcomes for each group over 8 days of learning. Light colors: reach failures; intermediate:  
508 grasp failures; dark: retrieval failures. **f**, A comparison of types of failed attempts between control and VNS  
509 (reach errors:  $p=0.0005$ ; grasp errors:  $p=0.0035$ ) and between control and Arch+VNS mice ( $p>0.05$ ) (VNS  $N=8$ ,  
510 Arch+VNS  $N=8$ , Control  $N=8$ ). **g**, Examples of all outward trajectories (reach initiation – reach maximum)  
511 during a session on day 8. Black lines represent each mouse's 'expert reach'. **h**, Percent of reaches that are  
512 'expert'. Comparisons were made for the mean 'expert' reaches in the late learning phase (grey box) between  
513 control and VNS mice ( $p=0.0142$ ) and control and Arch+VNS mice ( $p>0.05$ ) (VNS  $N=8$ , Arch+VNS  $N=6$ ,  
514 Control  $N=8$ ). **i**, Correlation of 'expert' reaches and task performance for all mice,  $R^2=0.62$ . **j**, Improvement in  
515 reach failures toward an expert trajectory as measured by increase in correlation coefficient (normalized to day  
516 1). Comparisons were made during late learning between control and VNS mice ( $p=0.0455$ ) and control and  
517 Arch+VNS mice ( $p>0.05$ ). **k**, Distribution of trajectory lengths from all failure attempts during early (grey) and  
518 late (purple) learning phases. **l**, Normalized improvement in reach features from early to late learning phases.  
519

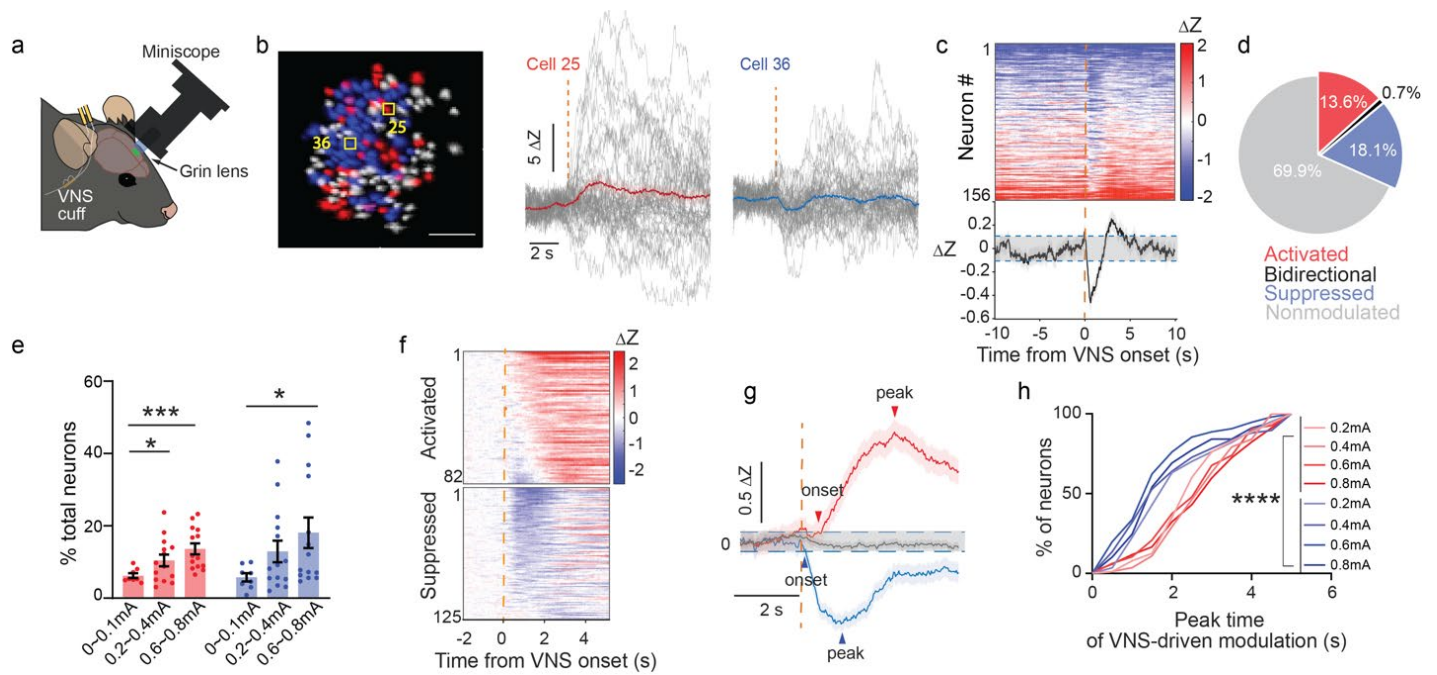

**Figure 6 | VNS drives acute neural suppression and activation in forelimb motor cortex**

**a**, Placement of the grin lens and miniscope above contralateral M1, with VNS cuff in the neck and its wire connectors on top back of skull. **b**, Left, representative neural ROIs from the field of view of one mouse M1 ( $n = 156$  neurons): neurons are pseudo color labeled as VNS-activated (red) and suppressed (blue), scale bar =  $100 \mu\text{m}$ . Middle and right: two representative neurons'  $\text{Ca}^{2+}$  responses aligned by VNS onset (gray: individual trials; red: VNS-activated; blue: VNS-suppressed). **c**, Top: individual neurons' average response z-scored to inactive phases of all neurons from the representative mouse in **b**; bottom: average neural responses of all neurons from the same mouse. **d**, Average % of total neurons activated, suppressed, bidirectionally modulated and nonmodulated after 0.6 to 0.8mA VNS delivery ( $N = 7$  mice, 767 neurons). **e**, % of total neurons that are activated or suppressed by VNS across different current amplitudes. ( $N = 7$  mice,  $n = 747\sim 807$  total neurons from each stimulation group, One-way ANOVA and multiple group comparison to 0~0.1 mA group). **f**, Neural response heatmap of all activated neurons and all suppressed neurons aligned at VNS onset. **g**, Average neural activity of all activated neurons and all suppressed neurons aligned at VNS onset ( $N=7$  mice, 82 activated neurons, 125 suppressed neurons, 0.6mA VNS). **h**, Cumulative distribution of neural response peak time of activated and suppressed neurons measured as the peak value of the average trace 0 to 5 s after VNS onset (82 to 151 neurons from each group, Kruskal-Wallis test followed by Dunn's multiple comparisons test,  $p < 0.0001$ ). \* $p < 0.05$ , \*\* $p < 0.01$ , \*\*\* $p < 0.001$ , \*\*\*\* $p < 0.0001$ ; bars and error bars represent the mean  $\pm$  s.e.m.

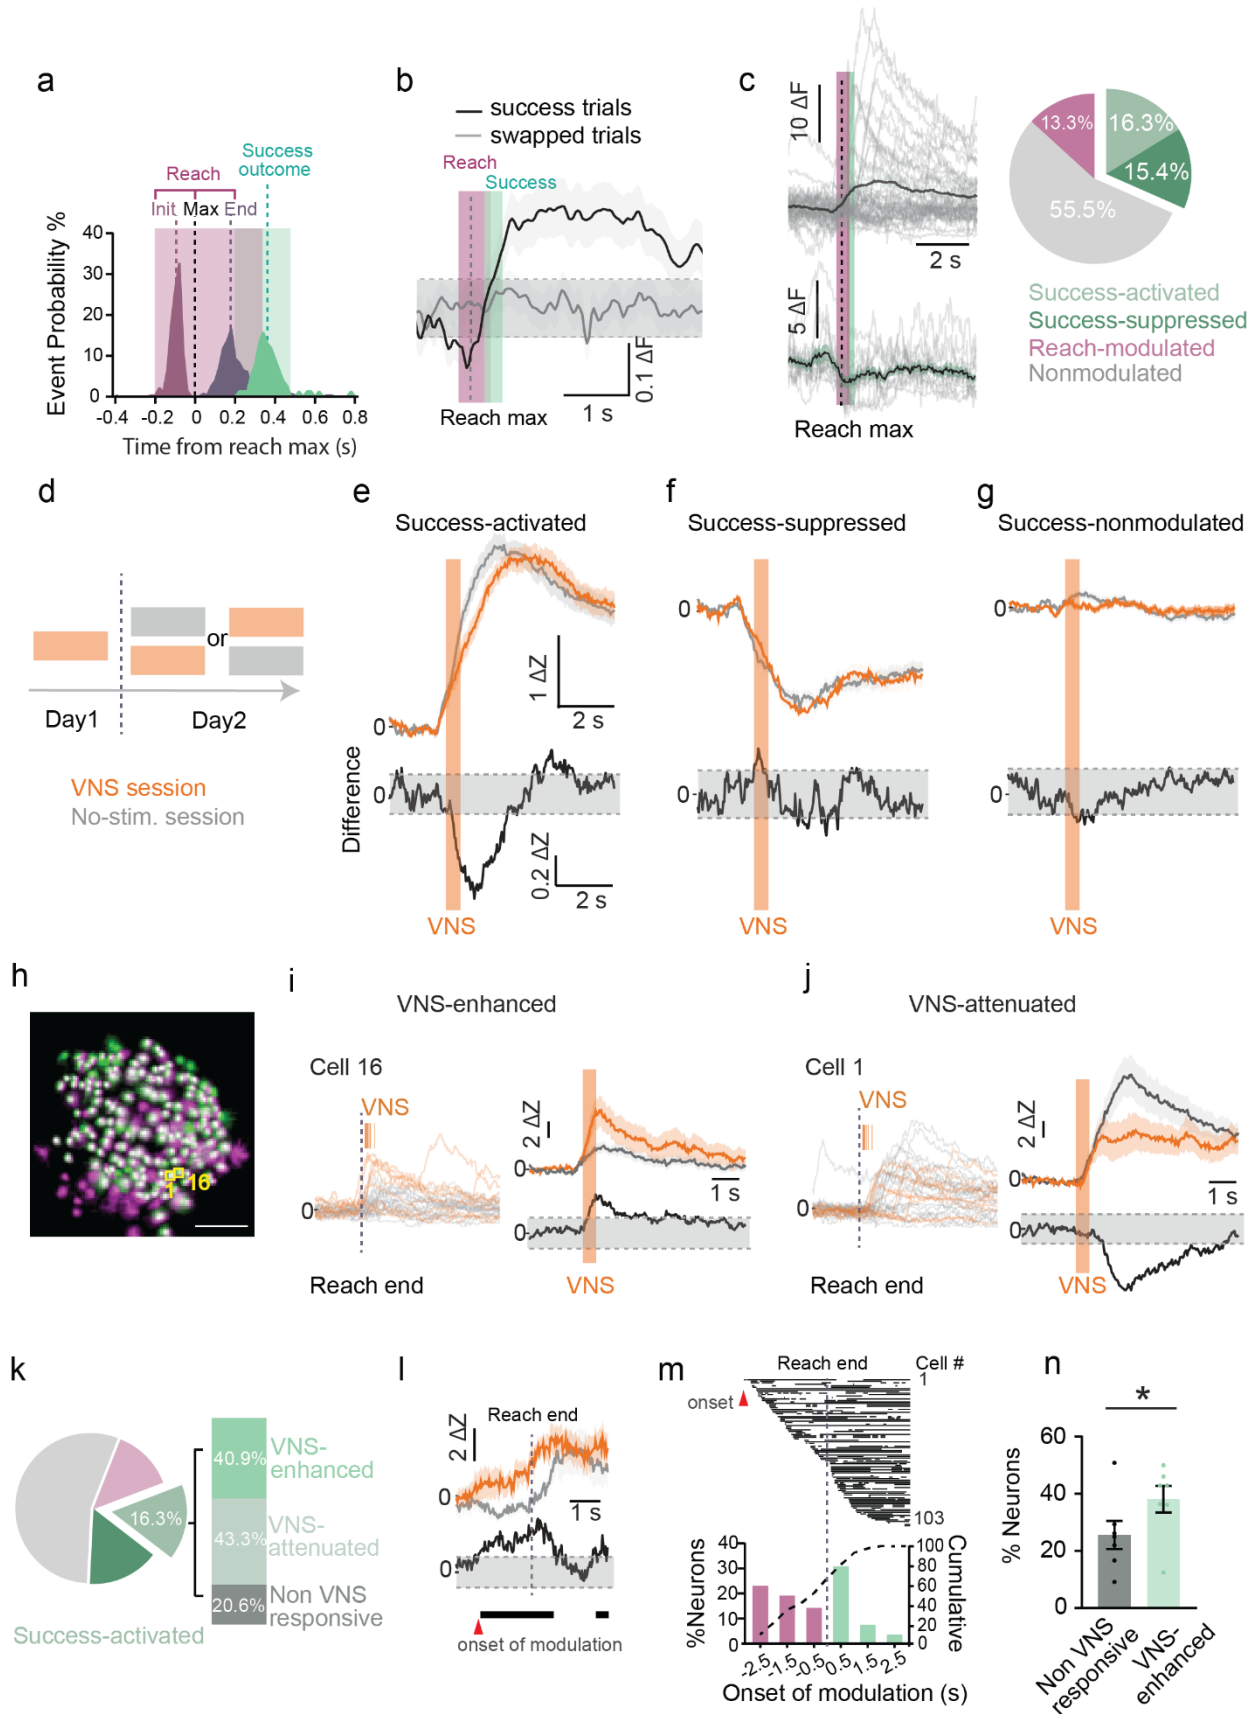

539 **Figure 7 | Success VNS selectively modulates activities of a subpopulation of task-activated M1 neurons in the reach**  
 540 **task.**

541 **a**, Peri-event histogram of the task related events aligned at reach max (N = 6 control mice, day 4, n = 278 single-reach  
542 success trials). Dashed lines indicate median reach initiation -93 ms, reach max 0 s, reach end 180 ms and CLARA success  
543 recognition 360 ms. Magenta indicates full reaches, green success recognition. **b**, Average neural activity of success trials  
544 (black) and random control trials (grey, n = 488 neurons). Gray dashed line indicates 2 s.d. from the baseline mean. **c**,  
545 Left: representative neural responses: red success-activated, blue success-suppressed, gray individual trials. Right: %  
546 neurons modulated in the task (903 neurons;  $16.3 \pm 6.4\%$  success-activated,  $15.4 \pm 10.2\%$  success-suppressed,  $13.3 \pm 5.5\%$   
547 preparation/reach modulated). **d**, Assignment of VNS or no-stimulation sessions. **e-g**, Top: Average responses of success-  
548 activated (d, 115 and 101 neurons), success-suppressed (e, 122 and 92 neurons) and success-nonmodulated neurons (f, 383  
549 and 394 neurons) in VNS (orange) and in no-stimulation session (gray). Bottom: the difference trace. **h**, Registered neurons  
550 (white) in VNS (green) and no-stimulation session (Magenta). **i&j**, Left: trial responses of success-activated neurons in  
551 no-stimulation session and in VNS session (orange ticks: trials' VNS onset). Right: the average and difference responses  
552 of the same neurons aligned by VNS onset. **k**, Percentage of success-activated neurons (n = 77 registered) that are enhanced  
553 ( $40.9 \pm 13.7\%$ ) or attenuated ( $43.3 \pm 21.2\%$ ) in VNS compared to no-stimulation session. **l**, One success-activated neuron  
554 modulated by VNS (supp. Fig. 6h) also have higher neural activity before reach end in VNS session. Arrowhead: onset of  
555 increased activity. **m**, Onset timing histogram of VNS-driven modulation of success-activated neurons. **n**, % neurons  
556 modulated in reach in VNS-nonmodulated versus VNS-enhanced neurons. \* $p < 0.05$ , \*\* $p < 0.01$ , \*\*\* $p < 0.001$ ,  
557 \*\*\*\* $p < 0.0001$ ; bars and error bars represent the mean  $\pm$  s.e.m.

558

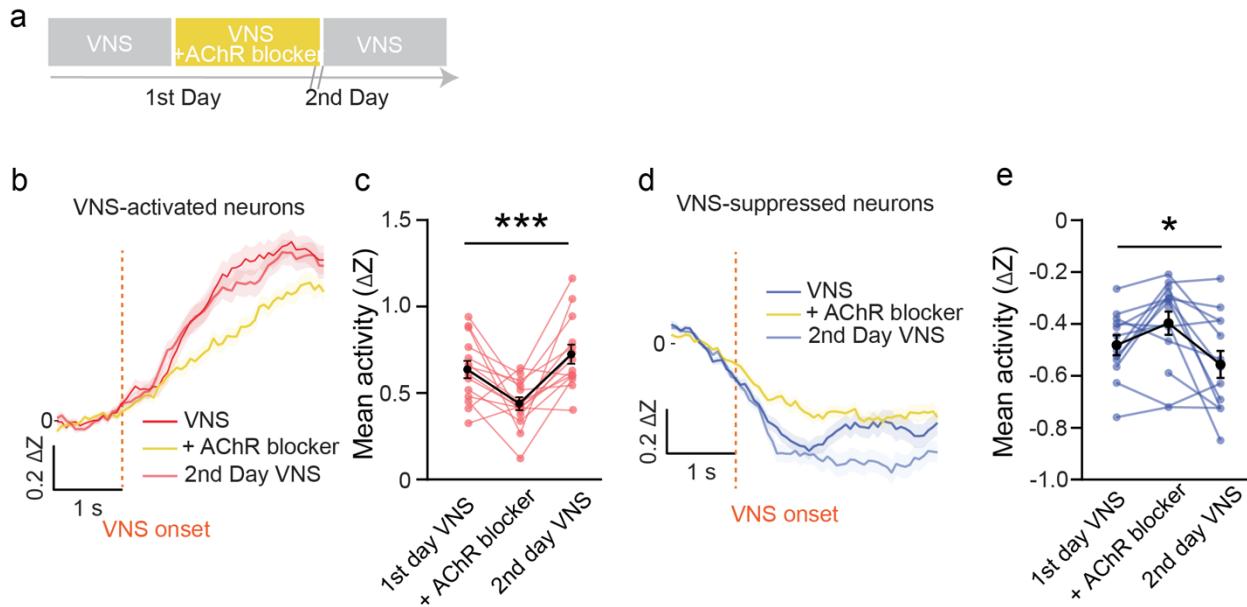

560 **Figure 8 | VNS driven acute neural modulation is mediated through AChRs.**

561 **a**, Diagram of experimental design: three sessions including a control VNS session in home cage, VNS session with AChR  
562 blocker, recovery VNS session on the 2nd day. **b&d**, Average neural activity of VNS-activated neurons (**b**,  $n = 104 \sim 116$   
563 neurons) or VNS-suppressed neurons (**d**,  $n = 124 \sim 143$  neurons) in control VNS session, VNS session with AChR blocker  
564 and the 2nd day recovery VNS session. **c**, Average neural activity comparison of VNS-activated neurons quantified from  
565 0.8 to 2.8 s after VNS onset, defined based onset and peak delay of VNS-driven neural activation in Figure. 6 ( $N = 7$  mice  
566 x two repeats each mouse, Repeated measures ANOVA,  $p < 0.001$ ). **e**, Average neural activities comparison of VNS  
567 suppressed-neurons quantified from 0.2 to 1.6 s from VNS onset defined based onset and peak delay of VNS-driven neural  
568 suppression in Figure. 6 ( $N = 7$  mice x two repeats each mouse, Repeated measures ANOVA,  $p = 0.02$ ). \* $p < 0.05$ ,  
569 \*\* $p < 0.01$ , \*\*\* $p < 0.001$ , \*\*\*\* $p < 0.0001$ ; bars and error bars represent the mean  $\pm$  s.e.m.

570



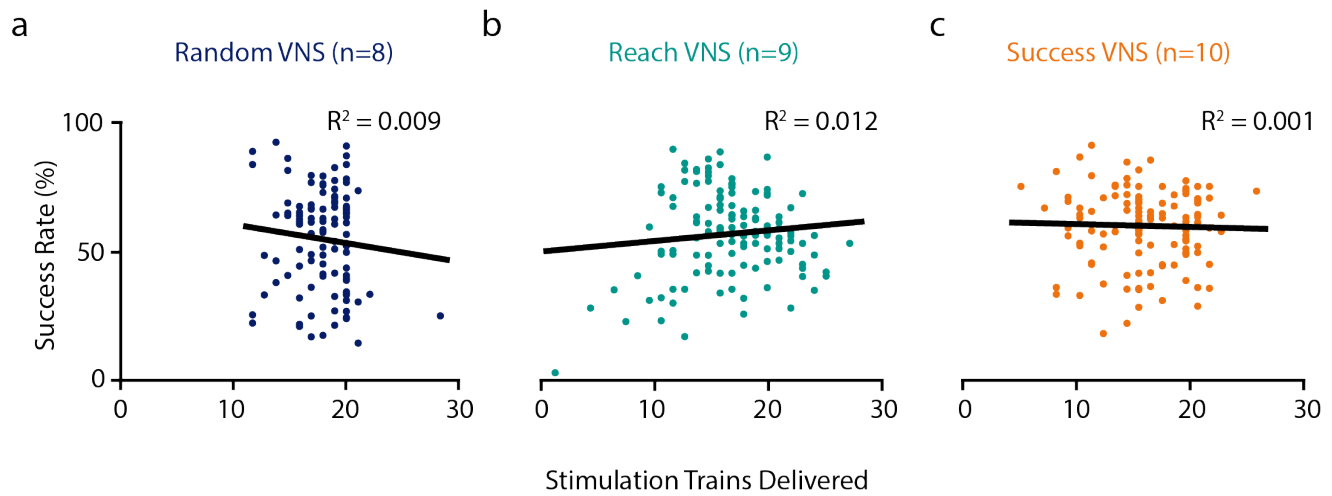

572 **Supplementary Figure 1 | Stimulation Amount between Random VNS, Reach VNS, and Success VNS does not**  
573 **predict success.**

574 **a-c**, A simple linear regression was calculated to predict success rate based on the amount of stimulation trains given across  
575 groups in a particular session. **a**, Random VNS linear regression ( $F=1.03$ ,  $p=0.3117$ ),  $R^2=0.009$ . **b**, Reach VNS linear  
576 regression ( $F=2.017$ ,  $p=0.22$ ),  $R^2=0.011$ . **c**, Success VNS linear regression equation ( $F=0.11$ ,  $p=0.7359$ ),  $R^2=0.001$ .

577

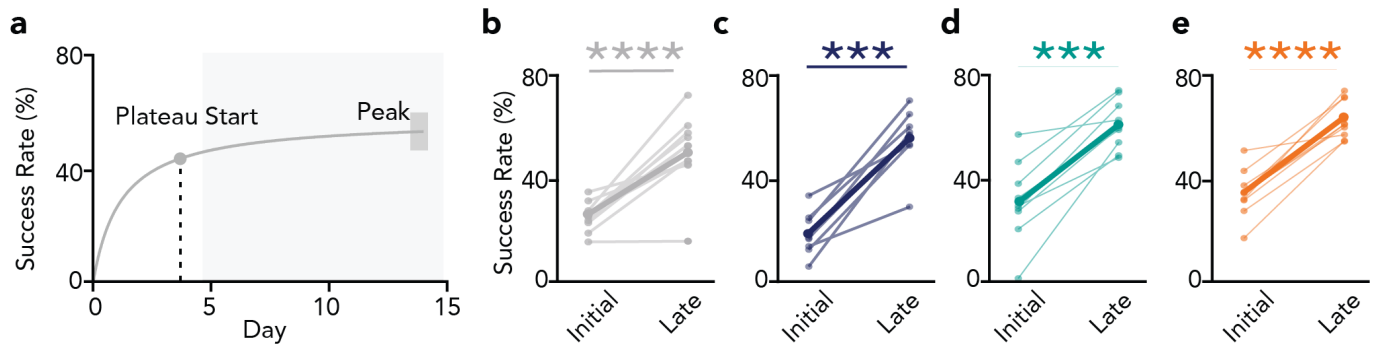

580 **a**, Nonlinear model of sham animal learning trajectories used to identify early and late learning phases (see methods). **b-e**,  
581 Comparison of performance during early and late learning phases. **b**, Sham VNS (paired T test,  $n=12$ ,  $p=0.0001$ ). **c**,  
582 Random VNS (paired T test,  $n=8$ ,  $p=0.0001$ ). **d**, Reach VNS (paired T test,  $n=9$ ,  $p=0.0002$ ). **e**, Success VNS (paired T test,  
583  $n=10$ ,  $p=0.001$ ).  
584

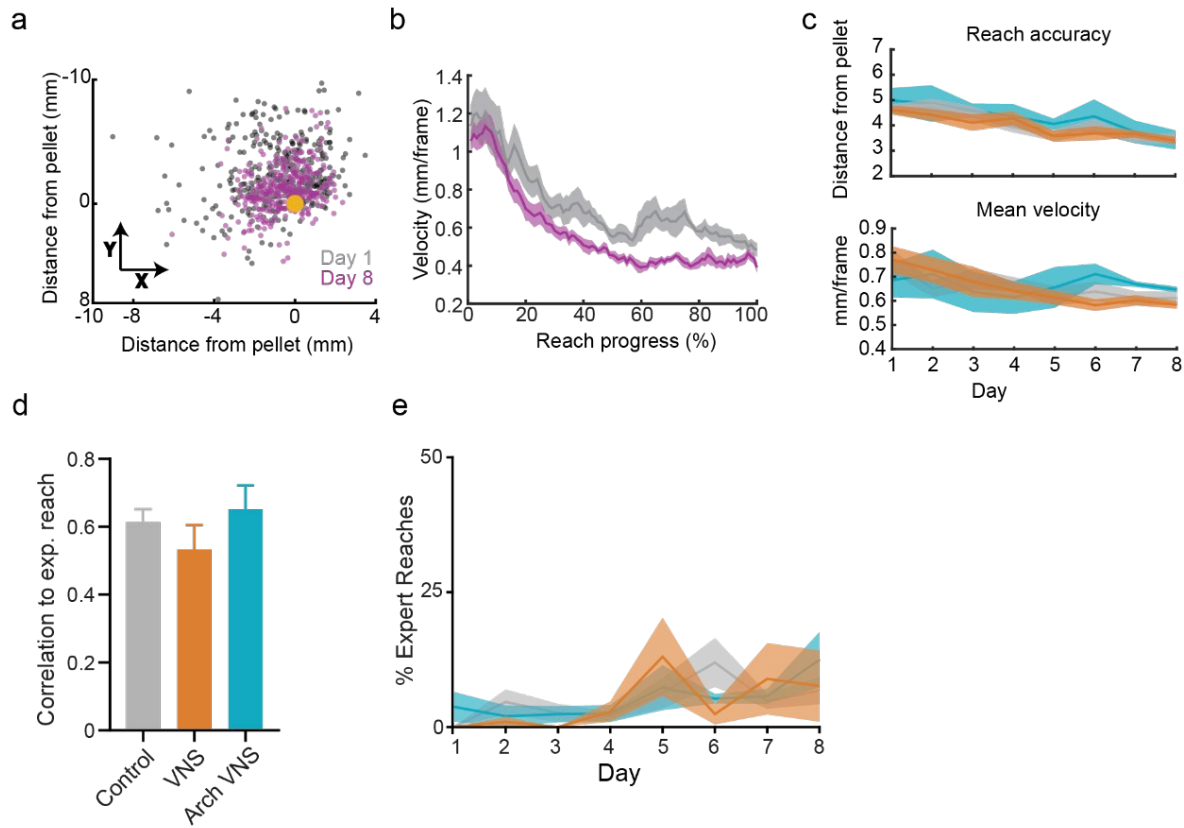

586 **Supplemental Figure 3 | VNS does not change speed, accuracy or initial exploration.**

587 **a**, Endpoint targeting of all control reaches on day 1 (grey) and day 8 (purple) of learning. Orange dot depicts pellet center.

588 **b**, Mean absolute velocity between reach initiation and reach maximum on day 1 and day 8 of learning. Reaches are time

589 warped to be an equal arbitrary length. **c**, Comparison of endpoint accuracy (top) and absolute velocity (bottom) between

590 control, VNS and Arch+VNS stimulation ( $p > 0.05$ , RM ANOVA, VNS N=8, Arch+VNS N=6, Control N=8). **d**, Reach

591 variability on day 1 for all groups, as measured by average correlation to expert trajectory ( $p > 0.05$ , one-way ANOVA,

592 VNS N=8, Arch+VNS N=6, Control N=8). **e**, Percent of 'reach failures' that qualify as expert reaches over learning.

593

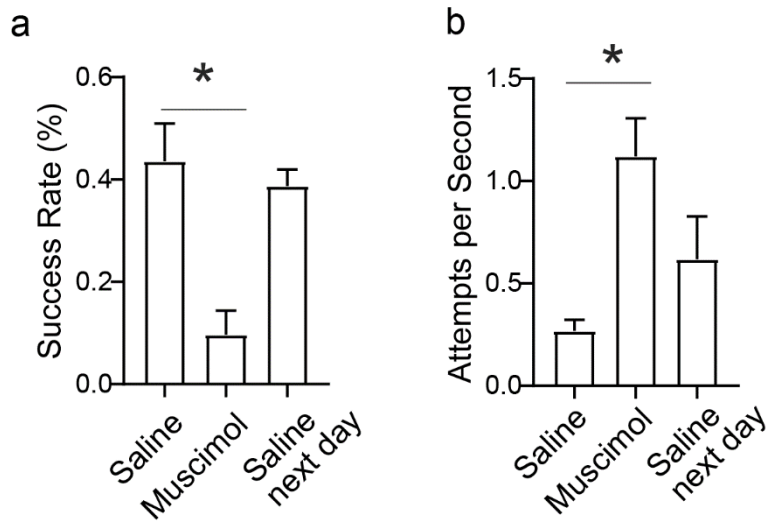

595 **Supplementary Figure 4 | The M1 activity is necessary for successful execution of the skilled reach task.**

596 **a**, Comparison of success rate of the skilled reach task before and after muscimol infusion into M1 (N=3, one-way  
597 ANOVA,  $p < 0.05$ ). **b**, Comparison of reach attempts per second in the same mice before and after muscimol infusion (n=3

598 mice, one-way ANOVA, control ~0.3 reaches per second, muscimol 1.1 reaches,  $p < 0.05$ ).

599

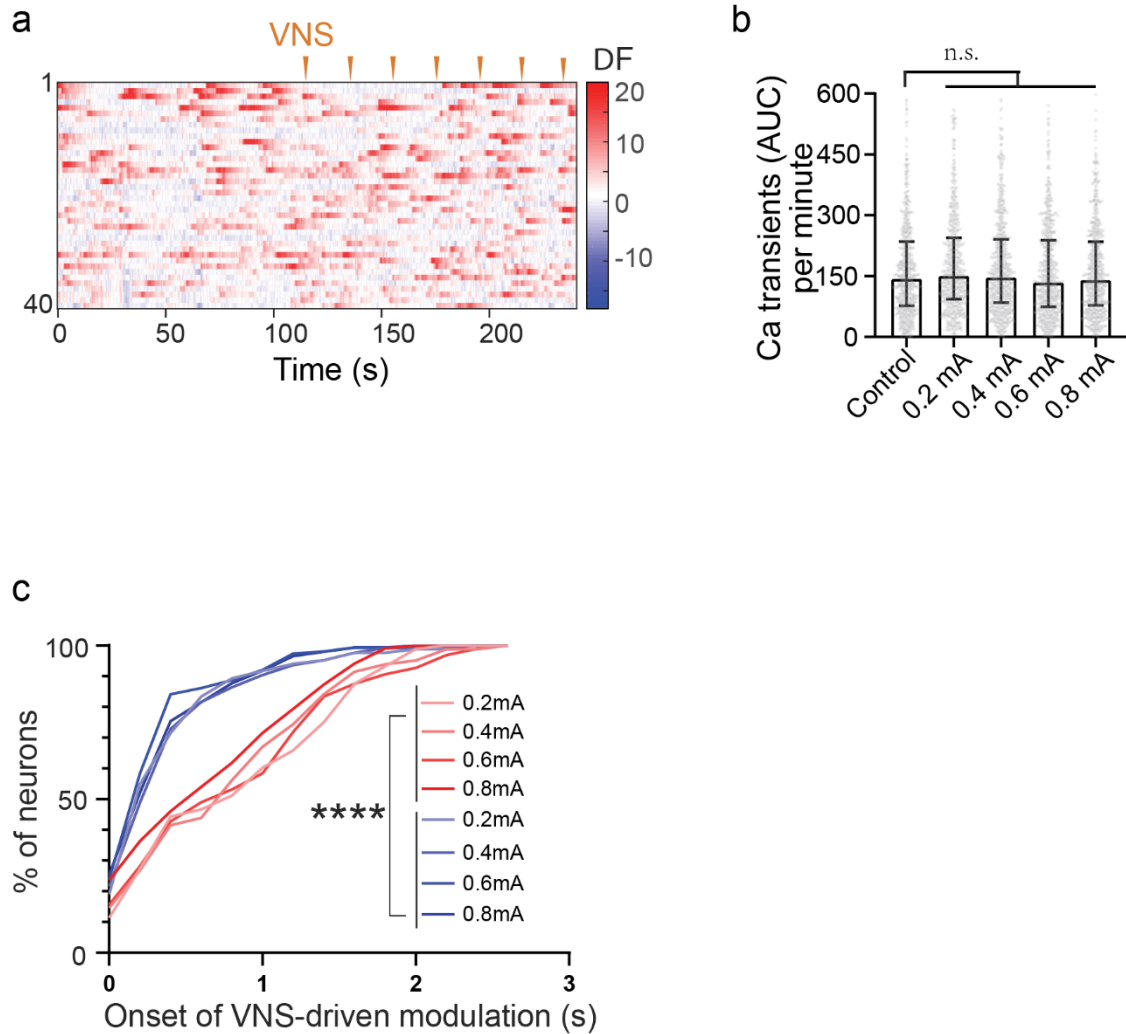

601 **Supplementary Figure 5 | The M1 activity is constant on minutes' time scale and the VNS response onset timing**  
602 **analysis.**

603 **a**, Heatmap plot of 40 neurons' GCaMP6m calcium response in L2/3 M1 from a representative mouse in the home cage  
604 two minutes before VNS delivery and two minutes while receiving delivery of VNS trains. Each orange arrow indicates  
605 one VNS pulse train delivery (15 pulses at 0.1 ms duration, 30 Hz, 0.4 mA). **b**, Ca transients quantified as area under the  
606 curve (AUC) of the fluorescence trace per minute in the 2nd minute after VNS application starts in VNS mice (N=7 mice,  
607 676 to 732 neurons), plot as median with interquartile range. Kruskal-Wallis test followed by Dunn's multiple comparison,  
608  $p > 0.05$  for all VNS stimulation groups compared to control. Controls are the same mice without VNS delivery). **c**,  
609 Cumulative distribution of neural response onset (measured as the first value goes above 2 s.d. of the baseline mean in the  
610 average trace 0~5 s after VNS onset) of VNS-activated or suppressed neurons (n=82 to 151 neurons from each group, N=7  
611 mice, Kruskal-Wallis test followed by Dunn's multiple comparisons test,  $p < 0.0001$ ).

612

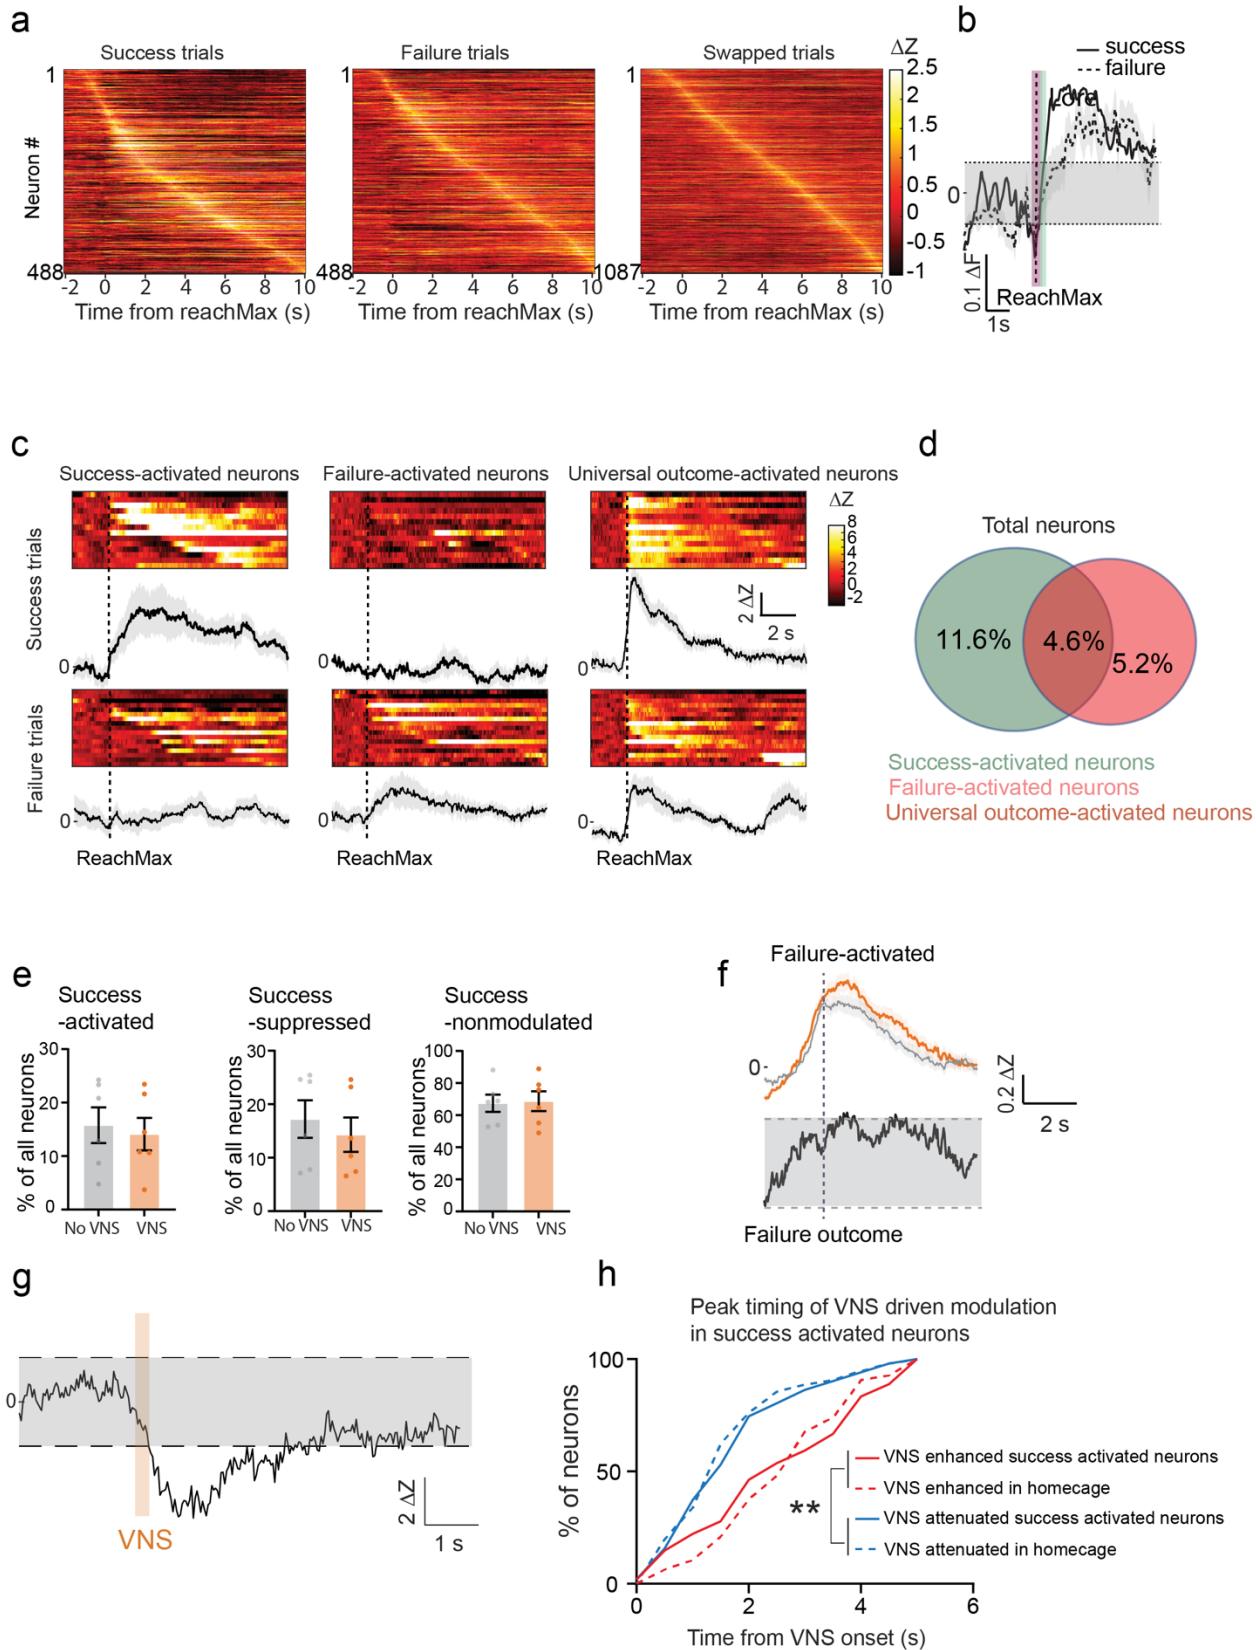

614

615 **Supplementary Figure 6 | The M1 neural dynamics in the reach task.**

616 **a**, Heatmap plot of individual neurons' response sorted by the peak timing; reach max is 0 s (N=6 mice, n=488 neurons).

617 **b**, Average neural activity of all neurons in single-reach success trials (black line), and single-reach failure trials (dotted

618 line). Grey block indicates 2 s.d. from the baseline mean during -6 to -3 s before reach max. **c**, Heatmap plot of trials and

619 average response of representative success-activated neuron, failure-activated neuron and universal outcome-activated  
620 neuron aligned by reach max. **d**, % of success activated-neurons, failure-activated neurons and universal outcome-activated  
621 neurons (N=1 mouse, n=172 neurons). **e**, The percentage of success-activated, -suppressed and non-modulated neurons in  
622 VNS sessions and in no-stimulation sessions (N=6 mice, n=488 neurons). **f**, Average neural activity of failure-activated  
623 neurons in VNS session (orange, n=77 neurons) and in no-stimulation session (grey, n=73 neurons), aligned at outcome  
624 recognition by CLARA. **g**, Cumulative distribution of neural response peak time of VNS enhancement or attenuation of  
625 outcome-activated neurons' outcome response. VNS driven enhancement or attenuation are measured as the peak value of  
626 the difference trace (individual neuron's VNS session average – no-stimulation session average) 0~5 s after VNS onset  
627 (51~54 neurons from each group, 6 mice, Kruskal-Wallis test,  $p < 0.0001$ ). **h**, The response to VNS of representative  
628 success-activated neuron in **fig. 7I** aligned at VNS and normalized to the -3 ~0 s before VNS.

629

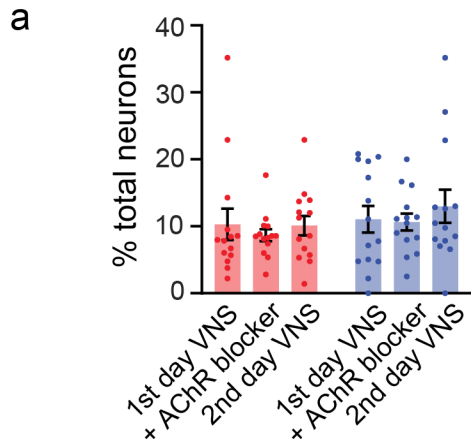

631 **Supplementary Figure 7 | The neural populations analysis with AChR blocker.**

632 **a**, Percentage of VNS-activated neurons and VNS-suppressed neurons in the total neuron populations after 0.4~0.6 mA

633 VNS delivery in control VNS session, VNS session with AChR blocker and recovery VNS session 2nd day (N=7 mice.

634 n=627 neurons, Brown-Forsythe ANOVA test,  $p>0.5$ )

635



636 **Methods**

637 **Animal care**

638 All animal procedures and experiments were performed in accordance with protocols approved by the Institutional Animal  
639 Care and Use Committee at the University of Colorado Anschutz Medical Campus. Male and female adult C57BL/6 wild-  
640 type mice between the age of 2 and 10 months old were used for all experiments unless otherwise noted. Mice were group-  
641 housed before surgery and single-housed following surgery and throughout behavior training. Mice were kept on 14 hr  
642 light/10 hr dark schedule with ad libitum access to food and water with exception from behavior-related food restriction  
643 (Forelimb Reach training).

644

645 **Surgery**

646 *Vagus nerve stimulating cuff implantations*

647 Commercial cuffs from Micro-leads (150um cuffs) and Cortec (100 um microsling cuffs), soldered to gold pins or Plastics1  
648 connectors, were implanted on the cervical vagus nerve<sup>28</sup>. Mice were anesthetized with 4.5% isoflurane anesthesia for  
649 induction and maintained with 1.5%. 1% injectable lidocaine was used locally at incision sites. Eye ointment was applied  
650 to the eye to prevent corneal drying. Temperature was regulated at 37°C with a thermostat-controlled heating pad. The  
651 vagus nerve was accessed with an incision in the ventral cervical region, and the nerve was bluntly dissected from the  
652 carotid sheath. The cuff was tunneled subcutaneously to the ventral cervical incision from an incision at the base of the  
653 dorsal skull. The vagus nerve was placed in the cuff. The ventral cervical incision was sutured using 6-0 absorbable sutures.  
654 The dorsal skull was cleaned using saline and ethanol, and electrical connectors were fixed to the skull using dental cement  
655 (C&B Metabond). GLUture (WPI) was used to seal the skin around the dental cemented headcap. Stimulation efficacy was  
656 measured using peripheral biomarkers such as breathing rate changes and heart rate reduction<sup>28</sup> on the day of surgery and  
657 weekly until the end of experiments with a paw sensor (Mouse Stat Jr., Kent Scientific). Mice received sub-cutaneous  
658 lactated ringers (~100 µL as necessary), intramuscular gentamicin (3 mg/kg), and intraperitoneal meloxicam (5 mg/kg)  
659 following surgery and as needed in cases of dehydration, infection, or pain. Mice were monitored for 7days to ensure  
660 proper recovery from surgery before any subsequent experiments were conducted.

661

662 *Viral injections and optical fiber implantation*

663 All surgeries were performed on mice expressing Cre recombinase driven by the ChAT promoter (ChAT-IRES-Cre,  
664 Jackson Labs stock #0064100<sup>97</sup>). Animals were prepared for surgery as described above, and the hair was removed prior  
665 to an incision over the dorsal skull. 200 µm diameter fiber optics with 1 cm ceramic cannulas were fabricated in-house  
666 using ONECore facilities. The skull at the dorsal incision was cleaned using sterile saline and ethanol. Two craniotomies  
667 were opened above the basal forebrain in each hemisphere (0.35 mm posterior, ±1.6 mm lateral of bregma) using a dental  
668 drill. Glass pipettes containing a floxed inhibitory archaerhodopsin (AAV-EF1a-DIO-eArch3.0-EYFP, UNC) or yellow  
669 fluorescent protein (YFP) control (AAV-EF1a-DIO-EYFP-WPRE-pA, UNC) were then inserted bilaterally into the basal  
670 forebrain using a stereotaxic device (-4.75 mm from dorsal surface of the brain). Approx. 210 nL of viral construct was  
671 injected over 5 minutes. The pipettes were removed and 200 µm fiber optic cannulas were inserted above each injection  
672 site (-4.65 mm from the dorsal surface of the brain). The craniotomies were then sealed using a surgical silicone (Kwik-  
673 Sil). The cannulas were fixed to the skull using dental cement (C&B Metabond). GLUture was used to seal the skin around

674 the headcap. Mice received intramuscular gentamicin (3 mg/kg), and intraperitoneal meloxicam (5 mg/kg) following  
675 surgery and as needed in cases of infection, or pain. Mice were monitored for 7 days to ensure proper recovery. After 14  
676 days, mice underwent VNS implantation described above (see *vagus nerve stimulating cuff implantations*).

677

### 678 *Electrode implantation*

679 Chronic tetrodes: Custom twisted wire tetrodes, built in-house, were implanted into the left basal forebrain of mice.  
680 Surgical preparation was as described above. Two craniotomies were opened using a dental drill: one above the left basal  
681 forebrain (0.35 mm posterior, 1.6 mm lateral of bregma) and one above the cerebellum (~1 mm posterior of lambda,  
682 midline). A tetrode was then inserted into the basal forebrain craniotomy using a stereotaxic device (-4.75 mm from the  
683 dorsal surface of the brain). A gold ground pin was inserted into the second craniotomy. Both craniotomies were sealed  
684 with surgical silicone (Kwik-Sil) and the tetrode was fixed to the skull using dental cement (C&B Metabond). GLUture  
685 was used to seal the skin around the dental cemented headcap. Mice received intramuscular gentamicin (3 mg/kg), and  
686 intra-peritoneal meloxicam (5 mg/kg) following surgery and as needed in cases of infection, or pain. Mice were monitored  
687 for 7 days to ensure proper recovery after which they underwent VNS implantation described above (see *vagus nerve*  
688 *stimulating cuff implantations*).

689

690 Acute Optrodes: Vagus nerve cuffs were implanted in transgenic mice expressing channelrhodopsin2 in cholinergic  
691 neurons (ChAT-ChR2<sup>98</sup>) using the protocol described above (see *vagus nerve stimulating cuff implantations*). After cuff  
692 implantation, while mice were still under anesthesia (1.5% isoflurane), mice were moved to a stereotaxic apparatus and a  
693 cranial window (2.5x2.5 mm) was opened above the left BF (0.35 mm posterior, 1.6 mm lateral of bregma). The stereotaxic  
694 apparatus was placed in a Faraday cage and single shank Optrodes from Neuronexus (A1x32-Edge-10mm-20-177-  
695 OA32LP) were inserted into the BF (-4.75 mm from the dorsal surface of the brain). Extracellular recordings were then  
696 performed while mice then underwent VNS (see *BF response to VNS*) and opto-tagging (see *opto-tagging*) protocols. Mice  
697 were sacrificed at the end of the experiment and the cuff and optrode were recovered.

698

### 699 *Cranial window surgery for miniscope objective lens and baseplate installation*

700 Mice were anesthetized with isoflurane and maintained similarly as described above until skull was exposed. A round  
701 cranial window (~1.8 mm diameter, ML 1.5 mm, AP 0.3 mm for center) was made above M1 contralateral to the reaching  
702 paw using a dental drill. A viral vector (AAV1.Syn.GCaMP6m.WPRE.SV40) was infused at  $2 \times 10^{12}$  titer to 200 ~300  $\mu\text{m}$   
703 beneath brain surface at 3~4 sites in the cranial window around the center, with ~200 nL at each site. Objective grin lenses  
704 (Edmund Optics, #64520, 1.8 mm, 0.23 mm WD) were lowered through the cranial window and pressed against the brain  
705 surface. The lens' side was sealed by surgical silicone (Kwik-Sil) and secured by dental cement. The exposed part of the  
706 lens above the skull was further coated with black nail polish. 3~4 weeks later, a metal baseplate was mounted to the skull  
707 over the lens with Loctite glue (Loctite 454 prism), guided by a miniscope for optimal field of view while the mice were  
708 anesthetized with isoflurane (1.5%). After the baseplate was securely mounted, the miniscope was taken off, a cap was  
709 attached to the baseplate and the mouse was returned to the home cage.

710

711

712 *Muscimol cannula surgery and infusion*

713 Using the same craniotomy surgery procedure described above, a round cranial window (~1.8 mm diameter, ML 1.5 mm,  
714 AP 0.3 mm for center) was made above the contralateral M1 and a plastic cannula (2~3 mm long pipet tip) was inserted  
715 into the window right above the brain surface. Then the pipet tip was secured by Kwik-Sil and dental cement. The top of  
716 the cannula was sealed with Kwik-Sil if the mouse was not undergoing behavior tests within a couple of hours. Before  
717 behavior tests, the mice were briefly anesthetized with isofluorane, the seal was removed and 1~2  $\mu$ L of muscimol at a  
718 concentration of 1 mg/mL was infused into the pipet tip.

719

720 **Behavior**

721 *Manual training of skilled forelimb reach task*

722 Mice were trained and scored on a skilled reach task<sup>27</sup>. Mice were food restricted and maintained at 85-90% of their free  
723 feeding weight throughout training. Following food restriction, mice were habituated to the training box for 20 minutes  
724 where mice were given 20 mg food pellets (BIO-serv) near the window of the box where reaching occurs. The training  
725 box is a custom-built plexiglass box with a 1 cm wide opening that provides access to a post with a divot to hold a pellet  
726 located approximately 1 cm away, with a left offset from the center of the opening to force right forepaw reaching. Learning  
727 sessions then occurred for 14 consecutive days where mice perform a reach to grasp task with the right forepaw for food  
728 pellets. Rehearsal sessions occurred 7-10 days after training and featured stimulated and unstimulated trials. For both  
729 training and rehearsal sessions, mice were scored on a per trial basis until 20 successful attempts or 20 minutes passed. A  
730 trial terminates in a success, or the pellet being knocked off the pellet holder by the mouse. Trial outcomes were recorded  
731 by the trainer in real time. A success was defined by when the mouse grabbed the pellet and returned it into the cage. Errors  
732 were subcategorized into: “reach error” (failure to correctly target), “grasp error” (failure to grasp the pellet), and “retrieval  
733 error” (successful grasp of pellet, but failure to return it into the box).

734

735 *VNS experiment groups*

736 Experiment groups for training were based on stimulation protocols. Sham VNS cohort were implanted with a cuff but  
737 were not stimulated at any point during learning. Success VNS were manually stimulated following every successful trial  
738 -- days 7 and 14 featured designated blocks without stimulation to track baseline learning levels versus trial-to-trial  
739 performance. Random VNS received stimulation at random intervals as generated by an Arduino board to achieve between  
740 15-20 stimulations per day, matching stimulation rates to other groups. Reach VNS received manual stimulation prior to  
741 movement onset on a pseudo-random 50% subset of trials to normalize VNS trains delivered. All groups were trained on  
742 the forelimb reach task for 14 days. For performance measurements in animals trained without VNS (Fig. 2 k-n), Reach  
743 VNS and Success VNS were applied during daily behavioral sessions. All animals received both Reach and Success VNS  
744 sessions on different days, with randomized order of session assignments across animals.

745

746 *CLARA skilled reach training and behavior data acquisition*

747 Mice were food restricted and habituated identically to manually trained animals. Dimensions of the behavior box were  
748 also identical in manual and CLARA cohorts. Behavior box used for miniscope recording was modified so that the front  
749 panel had an alcove above the height of the mouse head to accommodate the miniscope when the mouse was close to the

750 slit to reach. On day 1, the mice were primed to have one success before CLARA training session started. Learning sessions  
751 then occurred for 14 consecutive days (or specified otherwise in results), where mice perform a reach to grasp task with  
752 the right forepaw for food pellets. Each trial started as the automated dispenser placing a food pellet on the post, as the  
753 mouse reached to successfully retrieve it or knocked it off, the CLARA would mark success or failure as the trial outcome  
754 as the end of this trial. Each session lasted for 20 minutes, and mice were scored on a per attempt basis. Using the CLARA  
755 behavior system, high speed (150 Hz) video data was recorded from three FLIR Blackfly® S (model BFS-U3-16S2M-CS,  
756 Edmund Optics) cameras placed in front of the box, lateral to the box, and at a 45° angle above the box from the opposite  
757 side from the lateral camera (**Fig. 6a**). A neural network was trained prior to experiment sessions using manually annotated  
758 frames of the skilled reach behavior labeling the hand center and the pellet. Video frames from all cameras were sent  
759 through this network in real time to identify the location and state of the hand and pellet. This information was used to  
760 initiate trials via pellet placement, and to categorize attempt outcomes as either success or failure so that stimulation could  
761 be delivered in a closed-loop manner (for additional details, see<sup>45</sup>). The timing of pellet placement, success or failure  
762 outcome, VNS delivery, and optogenetic light delivery was recorded through CLARA. In the miniscope cohort, the timing  
763 of miniscope neural recording was cross registered with behavior video frames through a CLARA-controlled Arduino  
764 board.

#### 765 766 *Optogenetic+VNS experiment groups*

767 Experiment groups for training were based on stimulation type. The control cohort was injected with a floxed YFP construct  
768 that did not contain an opsin and received light stimulation (see *light stimulation parameters*), the Success VNS cohort  
769 was electrically stimulated (see *VNS stimulation parameters*), and the Arch+VNS cohort received both light and electrical  
770 stimulation. All groups received stimulation following every successful trial automatically through the CLARA system.

#### 771 772 *Miniscope groups*

773 Mice wore miniscopes for 5~10 minutes a few times in their home cages or the CLARA training box to habituate the  
774 weight. When recording VNS response in home cage, mice wearing miniscopes and VNS wires were put in home cage.  
775 About 4 minutes spontaneous neural activity were recorded as mice freely moved in the home cage, then 30~40 VNS were  
776 delivered every 20~30 s. Afterward, another ~4 minutes spontaneous activity was recorded. In sessions with AChR  
777 antagonists, scopolamine (1 mg/kg body weight) and mecamlamine (10 mg/kg body weight) were dissolved in saline and  
778 delivered to mice through intraperitoneal (IP) injection. The concentration of scopolamine and mecamlamine cocktail  
779 was chosen to have effects in brain circuits related to memory and learning without debilitating effects, according to  
780 previous studies<sup>99,100</sup>. 15 minutes after cocktail administration, the neural response was recorded during a home cage  
781 session.

782 For reach training recordings, food restricted mice were mounted with a miniscope and VNS wires and put in the  
783 training box to start a CLARA training session. The miniscope acquisition was turned on immediately as the CLARA  
784 training session started and each frame of the video was cross registered with the CLARA video frames. All mice were  
785 primed without VNS to have one success reach before the first session started. On the first day, VNS mice participated in  
786 one 20-minute Success VNS session. From day 2 to day 4, each VNS mouse participated in two sessions of training, with  
787 one of them being a Success VNS session and the other a no-stimulation session in which VNS was not delivered, which

788 was given on a pseudorandomized schedule (**Fig. 7d**). Control mice also received two training sessions without VNS each  
789 day. On days when mice receive two sessions of training, the two sessions are 1~3 hours apart.

790

#### 791 *Place preference test*

792 We used a standard conditioned place preference test to examine if VNS is rewarding or aversive. The behavior apparatus  
793 contained two compartments separated by a gate. Mice were tested for baseline preference in an initial 20-minute session  
794 where mice can freely navigate between compartments. Mice then were trained for three days with two 20-minute sessions  
795 each day where they received stimulation in only one compartment. Stimulation was delivered pseudo-randomly  
796 approximately once per minute. On the day of testing, no stimulation was given, and mice were allowed to freely navigate  
797 between compartments to see which compartment they spent more time in<sup>101</sup>. The amount of time spent in each  
798 compartment was compared between the baseline and testing day. Experiments were conducted with assistance from CU  
799 Anschutz Behavior Core.

800

#### 801 *Stimulation parameters*

##### 802 VNS stimulation parameters

803 For all VNS experiment groups, VNS was delivered as a 500 ms train of 15 pulses, with 100  $\mu$ s phase duration at 30 Hz.  
804 Current amplitudes were 0.4-0.6 mA. Stimulation parameters were controlled and delivered using Master8, PulsePal, or a  
805 CLARA+Arduino system, which were connected to a stimulation isolation unit (A-M Systems, Model 2200 Analog  
806 Stimulus Isolator) to control amperage.

807

##### 808 Light inhibition parameters

809 For all light stimulated groups, 561 nm light was delivered continuously for 500 ms. Light was delivered through a 200  
810 nm fiber-optic cable from a Class IIIb diode pumped solid-state laser (Cobalt) at 0.5 mW (calculated based on output  
811 efficiency from the bottom of the optical fiber). Stimulation parameters were controlled and delivered using a PulsePal, or  
812 a CLARA+Arduino system connected directly to the laser.

813

#### 814 **Behavior and kinematic analysis**

##### 815 *Manual behavior analysis*

816 A success percentage was generated for each session of each animal by determining the number of trials that resulted in a  
817 successful retrieval out of all trials initiated. Success percentages were compared between stimulation groups across all  
818 days of training, as well as by early and late learning phases. Early learning phase refers to days 1-4 of training, while the  
819 late phase refers to days 5-14, which were defined using a Weibull growth curve (See *quantification and statistical*  
820 *analysis*). On days where animals received blocks of stimulation, such as rehearsal groups, stimulated and unstimulated  
821 trials were compared on a per mouse basis within days. To determine a trial-level effect for the Success VNS group, we  
822 divided all trials to three categories, pre-success trials that occur immediately before each success trial, success trials and  
823 post-success trials that occur immediately after each success trial. We then compared the success rate between pre-success  
824 and post-success trials.

825

826 *Behavior curator analysis*

827 Videos acquired during CLARA training sessions were processed by custom Python scripts overnight to extract key reach  
828 timepoints: reach initiation (ReachInit), when the hand leaves the box; reach max (ReachMax), the outward point of  
829 maximum distance from reach initiation; reach end (ReachEnd), when the hand returns to the cage; and stimulation onset  
830 (stim), when a trial received a trigger pulse for VNS or light stimulation. The stamps of reachInit, reachMax and reachEnd  
831 were further manually screened for consistency. The accuracy of CLARA trial outcome classifications were verified, and  
832 failures were subcategorized *post-hoc* into reach, grasp and retrieval failures (see *Manual training of skilled forelimb reach*  
833 *task* for failure definitions).

834  
835 *Kinematic analysis*

836 3D location of the center of the paw and pellet were tracked during reach attempts (between reach initiation and reach end).  
837 Tracking data was extracted using custom MATLAB scripts (MATLAB Simulink) and documented as 3D data arrays for  
838 kinematic analysis. Positional data for gross targeting analysis was determined by selecting the 3D location of the hand  
839 and pellet at the reach max timepoint. Points were normalized such that the pellet center was 0,0,0. Euclidean distance  
840 between the hand center and pellet center was then calculated using the norm function from MATLAB. The mean distance  
841 from the pellet was compared in early and late phases and between stimulation groups. Reach velocity was obtained by  
842 measuring the absolute velocity between reach initiation and reach end, and then averaging the velocity over that period.  
843 The mean velocity was compared in early and late phases of training and between stimulation groups.

844  
845 *Reach consistency and expert reach*

846 Positional data between reachInit and reachEnd were normalized such that the pellet center was 0,0,0. Reach trajectory  
847 was defined as the time between reach initiation and reach end. Each trajectory was then temporally warped to be the same  
848 arbitrary ‘length’ of time using dynamic time warping<sup>102</sup>. An expert trajectory was constructed for each mouse by averaging  
849 the trajectories of all successful reach attempts made on each mouse’s last two days of training. Reach consistency was  
850 determined through comparison of reach trajectories to each mouse’s expert trajectory. Reach trajectories were compared  
851 to the expert trajectory through a correlation coefficient to obtain the mean correlation coefficient for each mouse in each  
852 training session. Additionally, any individual reach that had a correlation of 0.95 or higher with the expert trajectory was  
853 defined as an ‘expert reach’, and the percent of expert reaches were also recorded for each day. The number of expert  
854 reaches and mean correlation coefficients were then compared between VNS, Arch+VNS and control groups in early and  
855 late phases.

856  
857 *Feature consistency*

858 Several reach features were extracted from each reach attempt: start location (X, Y, Z), end location (X, Y, Z), mean  
859 absolute velocity, max absolute velocity, pathlength (length of full trajectory), and reach consistency (defined above in  
860 *reach consistency and expert reach*). The distribution of each feature was calculated for the early and late learning phases  
861 based on the stimulation group. The distribution of each early-late pair was normalized using the interquartile range of the  
862 early phase distribution. The normalized late interquartile range was subtracted from the normalized early range and the

863 difference was defined as ‘delta feature consistency’. A positive delta means that the distribution was more constrained  
864 during the late phase compared to the early phase.

## 865 866 **Electrophysiology recording and analysis**

### 867 *VNS electrophysiological recording in BF*

868 While mice were either under maintained anesthesia (1.5% isoflurane), or awake in a home cage, VNS was repeatedly  
869 delivered while recording from the left basal forebrain (see *optrode implantation*). No behavioral task was performed  
870 during recording. Mice received several (10-20) trains of VNS (0.5 s, 30 Hz, 100  $\mu$ s pulse-width, 0.6 mA), delivered  
871 approximately 90 s apart. Data was recorded with Cheetah acquisition software at 30 kHz using a Digital Lynx SX  
872 (Neuralynx). TTL pulses were sent from the Master-8 (A.M.P.I.) to the Digital Lynx SX for each pulse of a light or electric  
873 stimulation train. In acute experiments, mice were opto-tagged after all VNS trains were delivered to identify cholinergic  
874 units.

### 875 876 *Opto-tagging protocol*

877 While mice were under maintained anesthesia (1.5% isoflurane), recordings were performed in the left BF (see *optrode*  
878 *implantation*). Light was delivered using a class IIIb diode pumped solid state laser (Cobalt) attached to the optrode through  
879 a ceramic ferule. Opto-tagging stimulus consisted of several (10-20) trains of 5 mW, 488 nm light delivered just above the  
880 BF through a 105  $\mu$ m diameter fiber optic spaced  $\sim$ 30 s apart. Trains consisted of 10 pulses of light at 20 Hz with a 10 ms  
881 pulse duration.

### 882 883 *Neural classification of BF response*

884 After recording, units were clustered manually using clustering software SpikeSort 3D (Neuralynx) and imported into  
885 MATLAB. Isolation distance and L-ratio were used to quantify cluster quality and noise contamination<sup>103</sup>. The start of  
886 each stimulation train was identified *post-hoc* using custom scripts (Mathworks) and defined as a trial. The trial window,  
887 referred to as the ‘VNS stimulation window,’ was defined as: 1 s baseline before stimulation (-1 to 0 s), VNS delivery (0  
888 to 0.5 s), and 1 s after the end of VNS (0.5 to 1.5 s). Firing rate during the trial window was calculated using a 100 ms  
889 moving average, shifted by 1 ms from the start of the trial window to 100 ms after the end of the trial window. Baseline  
890 firing rate was defined as the mean firing rate during the baseline period (-1 to 0 s). Units were screened, and any unit with  
891 a mean firing rate below 0.5 Hz in anesthetized recordings or below 1 Hz in awake recordings were removed from the  
892 pool.  $\pm$ 1 ms around each stimulation pulse was removed to account for electrical noise. Firing rate was converted into a Z-  
893 score normalized to the mean firing rate and standard deviation of baseline activity. If a unit’s normalized firing rate was  
894  $\pm$ 2.56 s.d. from the baseline firing rate for  $>$ 100 ms during VNS delivery (0 to 0.5 s), the unit was defined as VNS  
895 responsive. If the change in firing rate was 2.56 s.d. above baseline it was further subclassified as Activated, and if it was  
896 2.56 s.d. below baseline, it was subclassified as Suppressed. A unit that met both criteria was classified based on which  
897 occurred first. Peak response, peak delay and response duration were compared between cholinergic and non-cholinergic  
898 units in anesthetized mice, and units recorded in awake mice. Peak response refers to the maximum normalized firing rate  
899 of VNS activated units after stimulation onset (0 to 1.5 s). Peak response delay refers to the amount of time, in ms, from

900 train onset (0 s) to peak response. Duration refers to the total amount of time that a VNS activated unit had normalized  
901 activity  $<2.56$  s.d. above baseline after stimulation onset (0 to 1.5s).

902  
903 *Neural classification of opto-tagging in BF*

904 After recording, units were clustered manually using clustering software SpikeSort 3D (Neuralynx). Each pulse was  
905 identified *post-hoc* using custom MATLAB scripts (Mathworks) and defined as a trial. Tagged units were identified using  
906 a stimulus-associated latency test (SALT<sup>18</sup>). This test compares the distribution of onset time of the first spike recorded  
907 during light delivery trials (10 ms) to the onset time of spikes during control windows of similar length (10 ms). Units  
908 whose p-value from the SALT test was  $<0.05$  were defined as cholinergic, all other units were defined as non-cholinergic.  
909 Firing rates of cholinergic and non-cholinergic units were calculated using the baseline firing rate of the unit from the VNS  
910 session.

911  
912 **Calcium imaging and analysis**

913 *Data acquisition*

914 Miniscope components and DAQ board were purchased and assembled by Optogenetics and Neural Engineering (ONE)  
915 Core according to UCLA miniscope (<http://miniscope.org/>) V3 guidelines. The objective GRIN lens used were Edmund  
916 optics #64-520 and achromatic lens were #45-407. Images were acquired at 30 Hz with Miniscope Control data acquisition  
917 package (affiliated with UCLA miniscope). Each imaging session was 15~20 minutes. The calcium signal images were  
918 saved as TIFF stacks through USB3.0 port to an SSD hard drive to reduce frame drops. For some home cage sessions, the  
919 mice behavior was recorded simultaneously by a LG webcam controlled by MiniscopeControl. For CLARA reach training  
920 sessions, behaviors were recorded by the CLARA system and the timing of miniscope frames and behavior camera frames  
921 were coordinated.

922  
923 *Imaging analysis*

924 Neural signal preprocessing

925 Image stacks that were acquired through the miniscope were motion corrected using MATLAB-based NoRMCorre  
926 packages<sup>104</sup> (<https://github.com/flatironinstitute/NoRMCorre>). For most sessions, the rigid motion correction module was  
927 sufficient to yield good results; in sessions with non-even shifting of the field of view, the non-rigid motion correction  
928 module was used. After motion correction, the field of view was cropped and spatially down sampled 4x to reduce the file  
929 size for subsequent neural signal extraction. Neural signals were extracted from the images using the MATLAB-based  
930 CNMF-E package<sup>105</sup> ([https://github.com/zhoupc/CNMF\\_E](https://github.com/zhoupc/CNMF_E)). The results were manually curated to discard non-neuronal  
931 ROIs. The resulting C-raw matrix, which was a scaled  $dF$  x ROIs, was used for further analysis. For individual ROIs, the  
932 time series  $dF$  of the whole session was further organized as a 2D matrix  $dF$  per trial x trials.

933  
934 Neural classification

935 To identify VNS responsive neurons, each trial epoch ( $\pm 10$ s around VNS) was mean z-scored to the 3 seconds prior to  
936 VNS. Noise response was estimated by calculating average Z-scored  $dF$  for individual neurons using a randomly shuffled



937 VNS onset times in the same session (excluding the 3 s window after each VNS onset in the whole session), and  
938 bootstrapping across 1000 repeats. For an individual neuron, if the real maximum Z-scored dF in the 3 s window after VNS  
939 is higher than the 95% value of the bootstrapped histogram, the neuron was defined as activated by VNS; if the real  
940 minimum Z-scored dF in the 3 s window after VNS is lower than the 95% value of randomized z-scored dF, the neuron  
941 was defined as suppressed by VNS.

942 To measure the onset or peak timing for the VNS response, VNS responsive neurons' dF were Z-scaled with the  
943 whole session baseline mean calculated from time points lacking Ca<sup>2+</sup> activity<sup>106</sup> (defined as time points with fluorescence  
944 values less than the 0.50 quantile of all fluorescence values). This general-based Z-score process allows dF level above or  
945 below 0 before VNS onset each trial and keeps the average dynamics of VNS response more accurately. For individual  
946 VNS-activated neurons, the onset of VNS activation was defined as the first time point when the Z-scored dF value reached  
947 above 2 s.d. of the mean baseline (the 3 seconds before VNS onset) in the 5 s after VNS onset. For individual VNS  
948 suppressed neurons, the onset of VNS suppression was the first time point when the Z-scored dF value reached below 2  
949 s.d. of the mean baseline (the 3 seconds before VNS onset) in the 5 s after VNS onset.

950 To identify reach-task responsive neurons, a similar trial-based Z-score processes were employed. Trial dFs were  
951 aligned by reach max. The baseline was taken as -6 to -3 s before the time of reach max. The response of individual neurons  
952 to the task was measured as the maximum and minimum values of the average Z-scored dF in the -800 to -300 ms (reach  
953 preparation), -300 to 200 ms (reach), 200 to 1700 ms (outcome), in reference to reach max as time 0. The cut off value for  
954 maximum or minimum dF for these time windows were estimated through a similar randomization procedure as above, in  
955 which that the same number of reach trials were randomized across the whole session 1000 times. Success trials and failure  
956 trials were analyzed separately unless noted otherwise. Several sub-groups of neurons were categorized as: preparation-  
957 activated, preparation-suppressed, reach-activated, reach-suppressed, success-activated, success-suppressed, failure-  
958 activated and failure-suppressed. Preparation and reach modulated neurons were grouped together as reach modulated  
959 neurons in **Fig. 7**. After neural classification, Z-score procedures were used to obtain the average success modulated  
960 neurons response to VNS and no-stimulation sessions.

961

#### 962 *Cross-registration of multiple sessions and cross session VNS modulated neurons definition*

963 Due to computational power limits, we chose to process neural activity data from each session and register neurons across  
964 sessions. The MATLAB-based CellReg package<sup>107</sup> (<https://github.com/zivlab/CellReg>) was used to identify the same  
965 neurons from multiple sessions based on spatial footprints of cellular activity (ROIs). Pairs of neurons with correlation  
966 coefficient > 0.65 were regarded as the same neurons.

967 For individual neurons, if a neuron was categorized as success-activated in one of the two training sessions, the  
968 neuron was regarded as a success-activated neuron. To look for significant modulation after VNS onset in VNS sessions  
969 of these success-activated neurons, the success outcome response of each neuron was aligned to VNS onset and measured  
970 in no-stimulation session and VNS session; the difference in response was obtained by subtracting the no-stimulation  
971 response from the VNS session response. A difference in response during the 0~3s after VNS onset that was higher or  
972 lower than 2.5 s.d. of the mean of baseline (-3 to 0 s before VNS onset) for at least 0.15 s was regarded as significant  
973 enhancement or attenuation in the VNS session. To look for significant modulation before VNS onset, the neural response  
974 was aligned to reach end. The baseline window was set from -6 to -3 s before reach end. This reach end alignment allows

975 us to evaluate differences in neural representation of reach preparation, execution, and outcome. Differences between the  
976 reach representation were compared between the Success VNS and no-stimulation sessions. A difference in response  
977 during the -3 to 3 s around reach end that was higher or lower than 2.5 s.d. of the mean of baseline (-6 to -3 s in reference  
978 to reach end) for at least 0.15 s was regarded as significant enhancement or attenuation. The onset time of the modulation  
979 was defined as the first time point of this enhancement or attenuation.

980 The control, AChR antagonists, and recovery sessions were processed similarly as VNS in home cage sessions, as  
981 described above. In addition, these sessions were temporally down sampled to a 15 Hz frame rate to reduce the file size so  
982 that each mouse's three sessions imaging data could be motion corrected and concatenated together to save the *post-hoc*  
983 cross registration step. For VNS-modulated neurons, the VNS activation window was empirically measured and defined  
984 as rise onset to peak timing in **Fig. 6g,h** (0.8 to 2.8 s after VNS onset; suppression window as 0.2 to 1.6 s after VNS onset).  
985

### 986 **Quantitation and Statistical Analysis**

987 Statistical analyses were conducted using Graphpad, JMP (SAS), or MATLAB (MathWorks). No normality tests were  
988 performed but individual data points are plotted to visualize distribution. We used parametric statistics including paired  
989 and unpaired Student's T-tests, and one-way ANOVA with Tukey's HSD *post-hoc* tests. Two-tailed tests and an alpha  
990 cutoff of <0.05 were employed unless otherwise stated. We employed a mixed model (Restricted Maximum Likelihood  
991 model (REML)) for all learning experiments. REML enables us to test how fixed effects (dependent variables) and known  
992 random effects (individual mouse, sex, age) correlate to an outcome variable.

$$993 \text{Outcome} = \text{fixed effect} + \text{known random effect} + \text{error}$$

994 Models were constructed with one or two fixed effects. In cases where there were two fixed effects, we ran full factorial  
995 models. To determine early and late phases of learning, a Weibull growth curve was applied to Sham VNS learning data.  
996 The formula was:

$$997 a * \left( 1 - \text{Exp} \left( - \left( \frac{\text{Day}}{b} \right)^c \right) \right)$$

998 a = asymptote, b = inflection point, c = growth rate. The AICc = 1295.90 and the R<sup>2</sup> = 0.21. We used the asymptote of the  
999 control cohort (55.50% ± 6.8%) to represent the plateau in success rate. The late learning phase was selected based on the  
1000 first training day that exceeded the lower 95<sup>th</sup> percentile of the asymptote (42.15%), which was day 4. We thus called late  
1001 learning days 5-14 and early learning days 1-4.  
1002

- 1003 1. Ben-Menachem, E. *et al.* Vagus Nerve Stimulation for Treatment of Partial Seizures: 1. A Controlled  
1004 Study of Effect on Seizures. *Epilepsia* **35**, 616–626 (1994).
- 1005 2. The Vagus Nerve Stimulation Study Group. A randomized controlled trial of chronic vagus nerve  
1006 stimulation for treatment of medically intractable seizures. The Vagus Nerve Stimulation Study Group.  
1007 *Neurology* **45**, 224–230 (1995).
- 1008 3. Rush, A. J. *et al.* Vagus Nerve Stimulation for Treatment-Resistant Depression: A Randomized,  
1009 Controlled Acute Phase Trial. *Biological Psychiatry* **58**, 347–354 (2005).
- 1010 4. Shi, C., Flanagan, S. R. & Samadani, U. Vagus Nerve Stimulation to Augment Recovery from Severe  
1011 Traumatic Brain Injury Impeding Consciousness: A Prospective Pilot Clinical Trial. *Neurol Res* **35**, 263–  
1012 276 (2013).
- 1013 5. Tyler, R. *et al.* Vagus Nerve Stimulation Paired with Tones for the Treatment of Tinnitus: A Prospective  
1014 Randomized Double-blind Controlled Pilot Study in Humans. *Sci Rep* **7**, 11960 (2017).
- 1015 6. Dawson, J. *et al.* Vagus nerve stimulation paired with rehabilitation for upper limb motor function after  
1016 ischaemic stroke (VNS-REHAB): a randomised, blinded, pivotal, device trial. *The Lancet* **397**, 1545–  
1017 1553 (2021).
- 1018 7. Pruitt, D. T. *et al.* Vagus Nerve Stimulation Delivered with Motor Training Enhances Recovery of  
1019 Function after Traumatic Brain Injury. *J. Neurotrauma* **33**, 871–879 (2016).
- 1020 8. Ganzer, P. D. *et al.* Closed-loop neuromodulation restores network connectivity and motor control after  
1021 spinal cord injury. *Elife* **7**, (2018).
- 1022 9. Meyers, E. C. *et al.* Enhancing plasticity in central networks improves motor and sensory recovery after  
1023 nerve damage. *Nat Commun* **10**, 5782 (2019).
- 1024 10. Kimberley, T. J. *et al.* Vagus Nerve Stimulation Paired With Upper Limb Rehabilitation After Chronic  
1025 Stroke. *Stroke* **49**, 2789–2792 (2018).
- 1026 11. Krahl, S. E., Clark, K. B., Smith, D. C. & Browning, R. A. Locus coeruleus lesions suppress the seizure-  
1027 attenuating effects of vagus nerve stimulation. *Epilepsia* **39**, 709–714 (1998).
- 1028 12. Beaumont, E. *et al.* Cervical vagus nerve stimulation augments spontaneous discharge in second- and  
1029 higher-order sensory neurons in the rat nucleus of the solitary tract. *Am J Physiol Heart Circ Physiol* **313**,  
1030 H354–H367 (2017).

- 1031 13. Hulseley, D. R. *et al.* Parametric characterization of neural activity in the locus coeruleus in response to  
1032 vagus nerve stimulation. *Exp. Neurol.* **289**, 21–30 (2017).
- 1033 14. Collins, L., Boddington, L., Steffan, P. J. & McCormick, D. Vagus nerve stimulation induces widespread  
1034 cortical and behavioral activation. *Current Biology* **31**, 2088-2098.e3 (2021).
- 1035 15. Hulseley, D. R. *et al.* Reorganization of Motor Cortex by Vagus Nerve Stimulation Requires Cholinergic  
1036 Innervation. *Brain Stimul* **9**, 174–181 (2016).
- 1037 16. Hulseley, D. R., Shedd, C. M., Sarker, S. F., Kilgard, M. P. & Hays, S. A. Norepinephrine and serotonin are  
1038 required for vagus nerve stimulation directed cortical plasticity. *Exp. Neurol.* **320**, 112975 (2019).
- 1039 17. Conner, J. M., Kulczycki, M. & Tuszynski, M. H. Unique Contributions of Distinct Cholinergic Projections  
1040 to Motor Cortical Plasticity and Learning. *Cereb Cortex* **20**, 2739–2748 (2010).
- 1041 18. Hangya, B., Ranade, S. P., Lorenc, M. & Kepecs, A. Central Cholinergic Neurons Are Rapidly Recruited  
1042 by Reinforcement Feedback. *Cell* **162**, 1155–1168 (2015).
- 1043 19. Zhang, K., Chen, C. D. & Monosov, I. E. Novelty, salience, and surprise-timing are signaled by neurons  
1044 in the basal forebrain. *Curr Biol* **29**, 134-142.e3 (2019).
- 1045 20. Porter, B. A. *et al.* Repeatedly pairing vagus nerve stimulation with a movement reorganizes primary  
1046 motor cortex. *Cereb. Cortex* **22**, 2365–2374 (2012).
- 1047 21. Borland, M. S. *et al.* Cortical Map Plasticity as a Function of Vagus Nerve Stimulation Intensity. *Brain*  
1048 *Stimulation* **9**, 117–123 (2016).
- 1049 22. Reed, A. *et al.* Cortical map plasticity improves learning but is not necessary for improved performance.  
1050 *Neuron* **70**, 121–131 (2011).
- 1051 23. Chase, M. H., Serman, M. B. & Clemente, C. D. Cortical and subcortical patterns of response to afferent  
1052 vagal stimulation. *Exp. Neurol.* **16**, 36–49 (1966).
- 1053 24. Fraschini, M. *et al.* VNS induced desynchronization in gamma bands correlates with positive clinical  
1054 outcome in temporal lobe pharmaco-resistant epilepsy. *Neurosci. Lett.* **536**, 14–18 (2013).
- 1055 25. Usami, K. *et al.* Modulation of cortical synchrony by vagus nerve stimulation in adult rats. *Conf Proc*  
1056 *IEEE Eng Med Biol Soc* **2013**, 5348–5351 (2013).
- 1057 26. Engineer, N. D. *et al.* Reversing pathological neural activity using targeted plasticity. *Nature* **470**, 101–  
1058 104 (2011).

- 1059 27. Whishaw, I. Q., Whishaw, P. & Gorny, B. The Structure of Skilled Forelimb Reaching in the Rat: A  
1060 Movement Rating Scale. *J Vis Exp* 816 (2008) doi:10.3791/816.
- 1061 28. Mughrabi, I. T. *et al.* Development and characterization of a chronic implant mouse model for vagus  
1062 nerve stimulation. *eLife* **10**, e61270 (2021).
- 1063 29. Groves, D. A. & Brown, V. J. Vagal nerve stimulation: a review of its applications and potential  
1064 mechanisms that mediate its clinical effects. *Neurosci Biobehav Rev* **29**, 493–500 (2005).
- 1065 30. Narayanan, J. T. *et al.* Cerebral activation during vagus nerve stimulation: a functional MR study.  
1066 *Epilepsia* **43**, 1509–1514 (2002).
- 1067 31. Feldman, D. E. The spike timing dependence of plasticity. *Neuron* **75**, 556–571 (2012).
- 1068 32. Dayan, P. & Balleine, B. W. Reward, Motivation, and Reinforcement Learning. *Neuron* **36**, 285–298  
1069 (2002).
- 1070 33. Leong, Y. C., Radulescu, A., Daniel, R., DeWoskin, V. & Niv, Y. Dynamic Interaction between  
1071 Reinforcement Learning and Attention in Multidimensional Environments. *Neuron* **93**, 451–463 (2017).
- 1072 34. Peters, A. J., Lee, J., Hedrick, N. G., O’Neil, K. & Komiyama, T. Reorganization of corticospinal output  
1073 during motor learning. *Nat. Neurosci.* **20**, 1133–1141 (2017).
- 1074 35. Padmashri, R. & Dunaevsky, A. Modulation of excitatory but not inhibitory synaptic inputs in the mouse  
1075 primary motor cortex in the late phase of motor learning. *Neurosci Lett* **709**, 134371 (2019).
- 1076 36. Wickens, J. R., Reynolds, J. N. & Hyland, B. I. Neural mechanisms of reward-related motor learning.  
1077 *Current Opinion in Neurobiology* **13**, 685–690 (2003).
- 1078 37. Censor, N., Sagi, D. & Cohen, L. G. Common mechanisms of human perceptual and motor learning. *Nat*  
1079 *Rev Neurosci* **13**, 658–664 (2012).
- 1080 38. Guo, W., Robert, B. & Polley, D. B. The Cholinergic Basal Forebrain Links Auditory Stimuli with Delayed  
1081 Reinforcement to Support Learning. *Neuron* **103**, 1164-1177.e6 (2019).
- 1082 39. Ramanathan, D., Tuszynski, M. H. & Conner, J. M. The Basal Forebrain Cholinergic System Is Required  
1083 Specifically for Behaviorally Mediated Cortical Map Plasticity. *J. Neurosci.* **29**, 5992–6000 (2009).
- 1084 40. Ramanathan, D. S., Conner, J. M., Anilkumar, A. A. & Tuszynski, M. H. Cholinergic systems are  
1085 essential for late-stage maturation and refinement of motor cortical circuits. *J Neurophysiol* **113**, 1585–  
1086 1597 (2015).

- 1087 41. Kucinski, A., Kim, Y. & Sarter, M. Basal forebrain chemogenetic inhibition disrupts the superior complex  
1088 movement control of goal-tracking rats. *Behav. Neurosci.* **133**, 121–134 (2019).
- 1089 42. Gielow, M. R. & Zaborszky, L. The Input-Output Relationship of the Cholinergic Basal Forebrain. *Cell*  
1090 *Reports* **18**, 1817–1830 (2017).
- 1091 43. Do, J. P. *et al.* Cell type-specific long-range connections of basal forebrain circuit. *eLife* **5**, e13214  
1092 (2016).
- 1093 44. Lima, S. Q., Hromádka, T., Znamenskiy, P. & Zador, A. M. PINP: A New Method of Tagging Neuronal  
1094 Populations for Identification during In Vivo Electrophysiological Recording. *PLoS One* **4**, e6099 (2009).
- 1095 45. Bowles, S., Williamson, W. R., Nettles, D., Hickman, J. & Welle, C. G. Closed-loop automated reaching  
1096 apparatus (CLARA) for interrogating complex motor behaviors. *J. Neural Eng.* (2021) doi:10.1088/1741-  
1097 2552/ac1ed1.
- 1098 46. Shmuelof, L., Krakauer, J. W. & Mazzoni, P. How is a motor skill learned? Change and invariance at the  
1099 levels of task success and trajectory control. *Journal of Neurophysiology* **108**, 578–594 (2012).
- 1100 47. Kawai, R. *et al.* Motor cortex is required for learning but not executing a motor skill. *Neuron* **86**, 800–812  
1101 (2015).
- 1102 48. Guo, J.-Z. *et al.* Cortex commands the performance of skilled movement. *eLife* **4**, e10774 (2015).
- 1103 49. Donoghue, J. P. & Sanes, J. N. Motor areas of the cerebral cortex. *J Clin Neurophysiol* **11**, 382–396  
1104 (1994).
- 1105 50. Sanes, J. N. & Donoghue, J. P. Plasticity and primary motor cortex. *Annu Rev Neurosci* **23**, 393–415  
1106 (2000).
- 1107 51. Peters, A. J., Chen, S. X. & Komiyama, T. Emergence of reproducible spatiotemporal activity during  
1108 motor learning. *Nature* **510**, 263–267 (2014).
- 1109 52. Levy, S. *et al.* Cell-Type-Specific Outcome Representation in the Primary Motor Cortex. *Neuron* **107**,  
1110 954-971.e9 (2020).
- 1111 53. Han, W. *et al.* A Neural Circuit for Gut-Induced Reward. *Cell* **175**, 887–888 (2018).
- 1112 54. Neuser, M. P. *et al.* Vagus nerve stimulation boosts the drive to work for rewards. *Nat Commun* **11**, 3555  
1113 (2020).

- 1114 55. Weber, I. *et al.* Trust your gut: vagal nerve stimulation in humans improves reinforcement learning. *Brain*  
1115 *Communications* **3**, (2021).
- 1116 56. Pekny, S. E., Izawa, J. & Shadmehr, R. Reward-Dependent Modulation of Movement Variability. *J.*  
1117 *Neurosci.* **35**, 4015–4024 (2015).
- 1118 57. Uehara, S., Mawase, F., Therrien, A. S., Cherry-Allen, K. M. & Celnik, P. Interactions between motor  
1119 exploration and reinforcement learning. *Journal of Neurophysiology* **122**, 797–808 (2019).
- 1120 58. Wolpert, D. M., Diedrichsen, J. & Flanagan, J. R. Principles of sensorimotor learning. *Nat Rev Neurosci*  
1121 **12**, 739–751 (2011).
- 1122 59. Athalye, V. R., Santos, F. J., Carmena, J. M. & Costa, R. M. Evidence for a neural law of effect. *Science*  
1123 **359**, 1024–1029 (2018).
- 1124 60. Oby, E. R. *et al.* New neural activity patterns emerge with long-term learning. *Proc Natl Acad Sci U S A*  
1125 **116**, 15210–15215 (2019).
- 1126 61. Aronov, D., Andalman, A. S. & Fee, M. S. A Specialized Forebrain Circuit for Vocal Babbling in the  
1127 Juvenile Songbird. *Science* **320**, 630–634 (2008).
- 1128 62. Garst-Orozco, J., Babadi, B. & Ölveczky, B. P. A neural circuit mechanism for regulating vocal variability  
1129 during song learning in zebra finches. *eLife* **3**, e03697 (2014).
- 1130 63. Dhawale, A. K., Smith, M. A. & Ölveczky, B. P. The Role of Variability in Motor Learning. *Annu Rev*  
1131 *Neurosci* **40**, 479–498 (2017).
- 1132 64. Wu, H. G., Miyamoto, Y. R., Castro, L. N. G., Ölveczky, B. P. & Smith, M. A. Temporal structure of motor  
1133 variability is dynamically regulated and predicts motor learning ability. *Nat Neurosci* **17**, 312–321 (2014).
- 1134 65. Athalye, V. R., Ganguly, K., Costa, R. M. & Carmena, J. M. Emergence of Coordinated Neural Dynamics  
1135 Underlies Neuroprosthetic Learning and Skillful Control. *Neuron* **93**, 955-970.e5 (2017).
- 1136 66. Dhawale, A. K., Miyamoto, Y. R., Smith, M. A. & Ölveczky, B. P. Adaptive Regulation of Motor Variability.  
1137 *Current Biology* **29**, 3551-3562.e7 (2019).
- 1138 67. Perez, S. M., Carreno, F. R., Frazer, A. & Lodge, D. J. Vagal Nerve Stimulation Reverses Aberrant  
1139 Dopamine System Function in the Methylazoxymethanol Acetate Rodent Model of Schizophrenia. *J*  
1140 *Neurosci* **34**, 9261–9267 (2014).

- 1141 68. Farrand, A. Q. *et al.* Vagus nerve stimulation improves locomotion and neuronal populations in a model  
1142 of Parkinson's disease. *Brain Stimul* **10**, 1045–1054 (2017).
- 1143 69. Sawaki, L. *et al.* Cholinergic Influences on Use-Dependent Plasticity. *Journal of Neurophysiology* **87**,  
1144 166–171 (2002).
- 1145 70. Shinoe, T., Matsui, M., Taketo, M. M. & Manabe, T. Modulation of Synaptic Plasticity by Physiological  
1146 Activation of M1 Muscarinic Acetylcholine Receptors in the Mouse Hippocampus. *J Neurosci* **25**, 11194–  
1147 11200 (2005).
- 1148 71. Kang, J. I., Huppé-Gourgues, F. & Vaucher, E. Boosting visual cortex function and plasticity with  
1149 acetylcholine to enhance visual perception. *Front. Syst. Neurosci.* **8**, (2014).
- 1150 72. Jiang, L. *et al.* Cholinergic signaling controls conditioned-fear behaviors and enhances plasticity of  
1151 cortical-amygdala circuits. *Neuron* **90**, 1057–1070 (2016).
- 1152 73. Lin, S.-C. & Nicolelis, M. A. L. Neuronal ensemble bursting in the basal forebrain encodes salience  
1153 irrespective of valence. *Neuron* **59**, 138–149 (2008).
- 1154 74. Conner, J. M., Culberson, A., Packowski, C., Chiba, A. A. & Tuszynski, M. H. Lesions of the Basal  
1155 Forebrain Cholinergic System Impair Task Acquisition and Abolish Cortical Plasticity Associated with  
1156 Motor Skill Learning. *Neuron* **38**, 819–829 (2003).
- 1157 75. Puzerey, P. A., Maher, K., Prasad, N. & Goldberg, J. H. Vocal learning in songbirds requires cholinergic  
1158 signaling in a motor cortex-like nucleus. *Journal of Neurophysiology* **120**, 1796–1806 (2018).
- 1159 76. Détári, L., Juhász, G. & Kukorelli, T. Effect of stimulation of vagal and radial nerves on neuronal activity  
1160 in the basal forebrain area of anaesthetized cats. *Acta Physiol Hung* **61**, 147–154 (1983).
- 1161 77. Smiley, J. F., Subramanian, M. & Mesulam, M.-M. Monoaminergic–cholinergic interactions in the primate  
1162 basal forebrain. *Neuroscience* **93**, 817–829 (1999).
- 1163 78. Zaborszky, L., Rosin, D. L. & Kiss, J. Alpha-adrenergic receptor ( $\alpha_2A$ ) is colocalized in basal  
1164 forebrain cholinergic neurons: a light and electron microscopic double immunolabeling study. *J*  
1165 *Neurocytol* **33**, 265–276 (2004).
- 1166 79. Schwarz, L. A. & Luo, L. Organization of the Locus Coeruleus-Norepinephrine System. *Current Biology*  
1167 **25**, R1051–R1056 (2015).



- 1168 80. Groves, D. A., Bowman, E. M. & Brown, V. J. Recordings from the rat locus coeruleus during acute vagal  
1169 nerve stimulation in the anaesthetised rat. *Neuroscience Letters* **379**, 174–179 (2005).
- 1170 81. Whishaw, I. Q., O'Connor, W. T. & Dunnett, S. B. THE CONTRIBUTIONS OF MOTOR CORTEX,  
1171 NIGROSTRIATAL DOPAMINE AND CAUDATE-PUTAMEN TO SKILLED FORELIMB USE IN THE RAT.  
1172 *Brain* **109**, 805–843 (1986).
- 1173 82. Lemon, R. N. Descending Pathways in Motor Control. *Annual Review of Neuroscience* **31**, 195–218  
1174 (2008).
- 1175 83. Adler, A., Zhao, R., Shin, M. E., Yasuda, R. & Gan, W.-B. Somatostatin-Expressing Interneurons Enable  
1176 and Maintain Learning-Dependent Sequential Activation of Pyramidal Neurons. *Neuron* **102**, 202-216.e7  
1177 (2019).
- 1178 84. Biane, J. S., Takashima, Y., Scanziani, M., Conner, J. M. & Tuszynski, M. H. Reorganization of  
1179 Recurrent Layer 5 Corticospinal Networks Following Adult Motor Training. *J Neurosci* **39**, 4684–4693  
1180 (2019).
- 1181 85. Luft, A. R. & Schwarz, S. Dopaminergic signals in primary motor cortex. *International Journal of*  
1182 *Developmental Neuroscience* **27**, 415–421 (2009).
- 1183 86. Hosp, J. A., Pekanovic, A., Rioult-Pedotti, M. S. & Luft, A. R. Dopaminergic Projections from Midbrain to  
1184 Primary Motor Cortex Mediate Motor Skill Learning. *J. Neurosci.* **31**, 2481–2487 (2011).
- 1185 87. Heffley, W. *et al.* Coordinated cerebellar climbing fiber activity signals learned sensorimotor predictions.  
1186 *Nat Neurosci* **21**, 1431–1441 (2018).
- 1187 88. Eggermann, E., Kremer, Y., Crochet, S. & Petersen, C. C. H. Cholinergic signals in mouse barrel cortex  
1188 during active whisker sensing. *Cell Rep* **9**, 1654–1660 (2014).
- 1189 89. Reimer, J. *et al.* Pupil fluctuations track rapid changes in adrenergic and cholinergic activity in cortex.  
1190 *Nat Commun* **7**, 13289 (2016).
- 1191 90. Musall, S., Urai, A. E., Sussillo, D. & Churchland, A. K. Harnessing behavioral diversity to understand  
1192 neural computations for cognition. *Current Opinion in Neurobiology* **58**, 229–238 (2019).
- 1193 91. Lai, J. & David, S. V. Short-Term Effects of Vagus Nerve Stimulation on Learning and Evoked Activity in  
1194 Auditory Cortex. *eNeuro* **8**, (2021).

- 1195 92. Chang, Y.-C. *et al.* Quantitative estimation of nerve fiber engagement by vagus nerve stimulation using  
1196 physiological markers. *Brain Stimulation* **13**, 1617–1630 (2020).
- 1197 93. Pelot, N. A., Behrend, C. E. & Grill, W. M. Modeling the response of small myelinated axons in a  
1198 compound nerve to kilohertz frequency signals. *J Neural Eng* **14**, 046022 (2017).
- 1199 94. Settell, M. L. *et al.* Functional vagotomy in the cervical vagus nerve of the domestic pig: implications for  
1200 the study of vagus nerve stimulation. *J Neural Eng* **17**, 026022 (2020).
- 1201 95. Wu, D. *et al.* Effect and Safety of Transcutaneous Auricular Vagus Nerve Stimulation on Recovery of  
1202 Upper Limb Motor Function in Subacute Ischemic Stroke Patients: A Randomized Pilot Study. *Neural*  
1203 *Plasticity* **2020**, e8841752 (2020).
- 1204 96. Redgrave, J. N. *et al.* Transcutaneous Auricular Vagus Nerve Stimulation with Concurrent Upper Limb  
1205 Repetitive Task Practice for Poststroke Motor Recovery: A Pilot Study. *J Stroke Cerebrovasc Dis* **27**,  
1206 1998–2005 (2018).
- 1207 97. Rossi, J. *et al.* Melanocortin-4-receptors Expressed by Cholinergic Neurons Regulate Energy Balance  
1208 and Glucose Homeostasis. *Cell Metab* **13**, 195–204 (2011).
- 1209 98. Zhao, S. *et al.* Cell-type Specific Optogenetic Mice for Dissecting Neural Circuitry Function. *Nat Methods*  
1210 **8**, 745–752 (2011).
- 1211 99. Riekkinen, P., Sirviö, J., Aaltonen, M. & Riekkinen, P. Effects of concurrent manipulations of nicotinic  
1212 and muscarinic receptors on spatial and passive avoidance learning. *Pharmacol Biochem Behav* **37**,  
1213 405–410 (1990).
- 1214 100. Riekkinen, P., Riekkinen, M. & Sirviö, J. Cholinergic drugs regulate passive avoidance performance via  
1215 the amygdala. *J Pharmacol Exp Ther* **267**, 1484–1492 (1993).
- 1216 101. Prus, A. J., James, J. R. & Rosecrans, J. A. Conditioned Place Preference. in *Methods of Behavior*  
1217 *Analysis in Neuroscience* (ed. Buccafusco, J. J.) (CRC Press/Taylor & Francis, 2009).
- 1218 102. Li, Q. *et al.* Refinement of learned skilled movement representation in motor cortex deep output layer.  
1219 *Nature Communications* **8**, 15834 (2017).
- 1220 103. Schmitzer-Torbert, N., Jackson, J., Henze, D., Harris, K. & Redish, A. D. Quantitative measures of  
1221 cluster quality for use in extracellular recordings. *Neuroscience* **131**, 1–11 (2005).

- 1222 104. Pnevmatikakis, E. A. & Giovannucci, A. NoRMCorre: An online algorithm for piecewise rigid motion  
1223 correction of calcium imaging data. *J Neurosci Methods* **291**, 83–94 (2017).
- 1224 105. Zhou, P. *et al.* Efficient and accurate extraction of in vivo calcium signals from microendoscopic video  
1225 data. *eLife* **7**, e28728 (2018).
- 1226 106. Jimenez, J. C. *et al.* Anxiety Cells in a Hippocampal-Hypothalamic Circuit. *Neuron* **97**, 670-683.e6  
1227 (2018).
- 1228 107. Sheintuch, L. *et al.* Tracking the Same Neurons across Multiple Days in Ca<sup>2+</sup> Imaging Data. *Cell Rep*  
1229 **21**, 1102–1115 (2017).
- 1230
